# Supplementary material for: Specialized contributions of mid-tier stages of dorsal and ventral pathways to stereoscopic processing in macaque
Source: eLife journal article supplement (doi:10.7554/elife.58749), 2021-02-24
Supplement: supp [file elife-58749-supp-v1.zip]

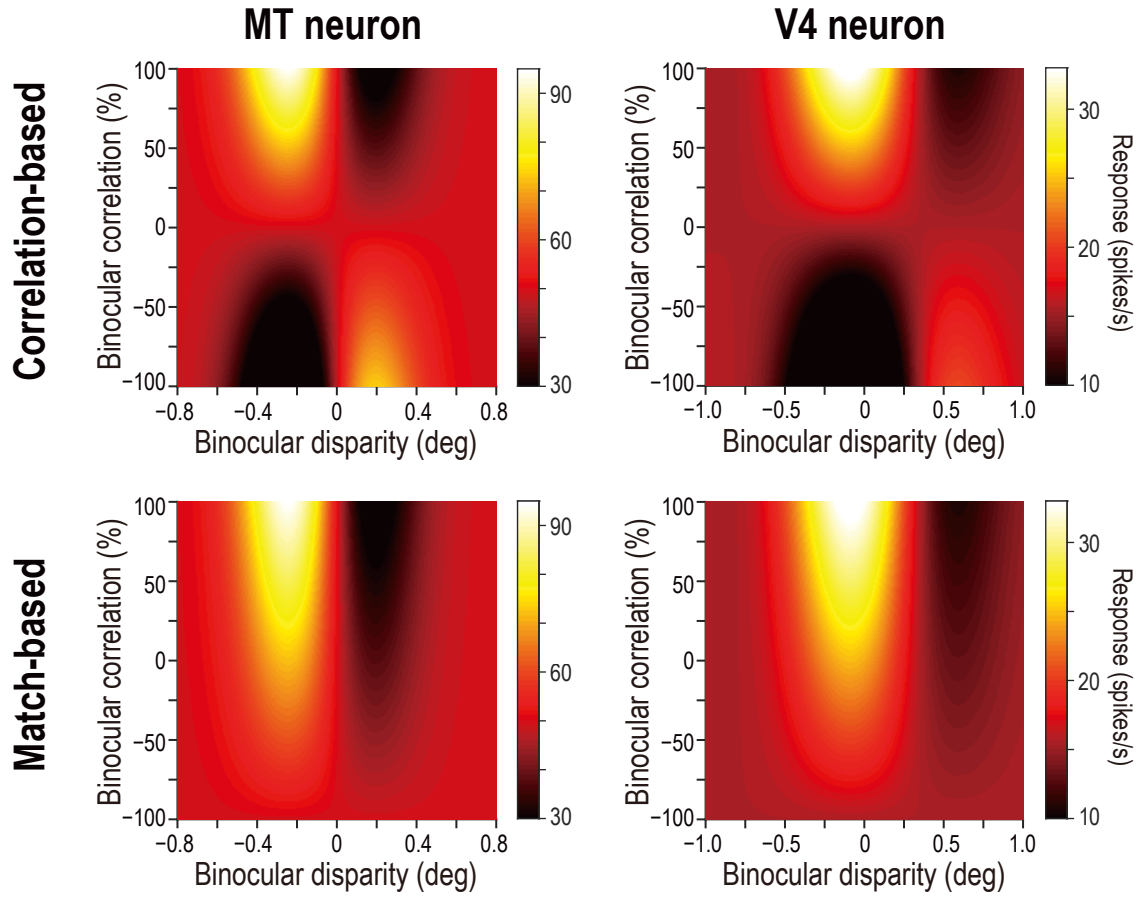

**Figure 2 - figure supplement 1: Predicted response maps for example MT and V4 neurons.** Compare the observed response maps for the same neurons (shown in **Figures. 2C,D**) and the predicted maps shown here. The observed map for the example MT neuron is closer to the correlation-based prediction (**top left**), whereas the observed map for the V4 neuron is closer to the match-based prediction (**bottom right**). We constructed the predictions for each example neuron as follows: we started with the Gabor functions fitted to the disparity-tuning data for correlated RDSs (i.e., at 100% binocular correlation). Next, we computed the predicted responses at lower correlation levels using the linear functions shown in **Figure 4A**; these functions dictate how the tuning amplitude should change with decreasing binocular correlation for pure correlation-based and match-based models. Specifically, we multiplied the signed amplitude ratio of the correlation-based representation or of the match-based representation by the Gabor function at 100% correlation. The predictions were plotted using the same color ranges as the corresponding observed data.
