# Supplementary material for: Specialized contributions of mid-tier stages of dorsal and ventral pathways to stereoscopic processing in macaque
Source: eLife journal article supplement (doi:10.7554/elife.58749), 2021-02-24
Supplement: supp [file elife-58749-supp-v1.zip]

Archive with 25 entries (25 files):
- elife_poa_e58749_Figure_2_source_data_1.csv
- elife_poa_e58749_Figure_3_source_data_1.csv
- elife_poa_e58749_Figure_4_source_data_1.csv
- elife_poa_e58749_Figure_5_source_data_1.csv
- elife_poa_e58749_Figure_5_figure_supplement_1_source_data_1.csv
- elife_poa_e58749_Figure_5_figure_supplement_4_source_data_1.csv
- elife_poa_e58749_Figure_6_source_data_1.csv
- elife_poa_e58749_Figure_6_figure_supplement_2_source_data_1.csv
- elife_poa_e58749_Figure_7_source_data_1.csv
- elife_poa_e58749_Figure_8_source_data_1.csv
- elife_poa_e58749_Figure_9_source_data_1.csv
- elife_poa_e58749_Figure_9_source_data_2.csv
- elife_poa_e58749_Figure_9_source_data_3.csv
- elife_poa_e58749_Figure_9_figure_supplement_1_source_data_1.csv
- elife_poa_e58749_Transparent_Reporting_File.docx
- elife_poa_e58749_Figure_2_figure_supplement_1.pdf
- elife_poa_e58749_Figure_3_figure_supplement_1.pdf
- elife_poa_e58749_Figure_5_figure_supplement_1.pdf
- elife_poa_e58749_Figure_5_figure_supplement_2.pdf
- elife_poa_e58749_Figure_5_figure_supplement_3.pdf
- elife_poa_e58749_Figure_5_figure_supplement_4.pdf
- elife_poa_e58749_Figure_5_figure_supplement_5.pdf
- elife_poa_e58749_Figure_6_figure_supplement_1.pdf
- elife_poa_e58749_Figure_6_figure_supplement_2.pdf
- elife_poa_e58749_Figure_9_figure_supplement_1.pdf
