# Supplementary material for: Specialized contributions of mid-tier stages of dorsal and ventral pathways to stereoscopic processing in macaque
Source: eLife journal article supplement (doi:10.7554/elife.58749), 2021-02-24
Supplement: supp [file elife-58749-supp-v1.zip]

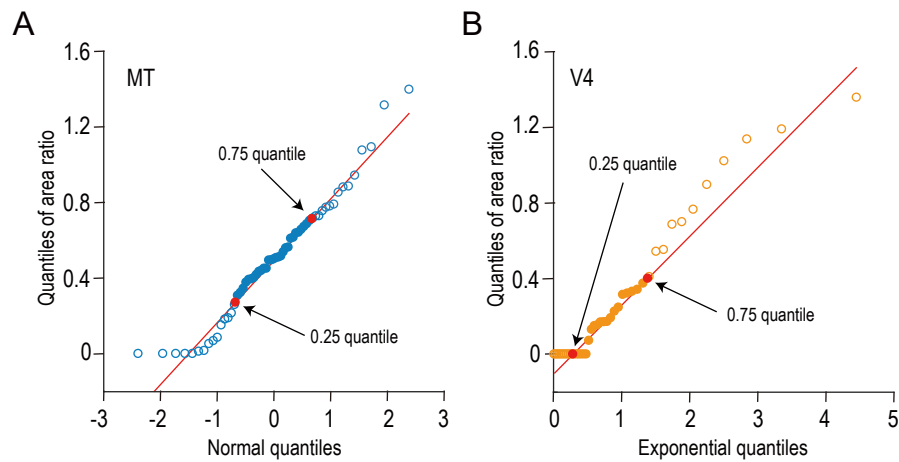

**Figure 5-figure supplement 2: The distributions of the area ratios for MT and V4 are compared against normal and exponential distributions, respectively.** We examined the shapes of area-ratio distributions using quantile-quantile plots. **(A)** The quantiles of area ratios for MT are plotted against the theoretical quantiles expected from the standard normal distribution. **(B)** Likewise, the quantiles of V4 data are plotted against the theoretical quantiles expected from an exponential distribution (mean = 1). Red lines are drawn through the 0.25 and 0.75 quantiles. The data between these two points are well aligned on the red lines, meaning that the area-ratio distributions from MT and V4 follow the normal and exponential distributions, respectively, within the middle 50% of the data range.
