# Supplementary material for: Specialized contributions of mid-tier stages of dorsal and ventral pathways to stereoscopic processing in macaque
Source: eLife journal article supplement (doi:10.7554/elife.58749), 2021-02-24
Supplement: supp [file elife-58749-supp-v1.zip › elife_poa_e58749_Figure_2_source_data_1.csv]

Area	BinoCorr	Disparity	MeanResponse
MT	-100	-0.8	48.29417757
MT	-100	-0.6	40.91885565
MT	-100	-0.4	41.2845179
MT	-100	-0.2	29.52263083
MT	-100	0	62.4408206
MT	-100	0.2	76.14862674
MT	-100	0.4	58.04791838
MT	-100	0.6	47.18415829
MT	-100	0.8	52.39732493
MT	-70	-0.8	54.01999418
MT	-70	-0.6	49.97857081
MT	-70	-0.4	37.69032286
MT	-70	-0.2	31.11031655
MT	-70	0	60.01696308
MT	-70	0.2	61.90627292
MT	-70	0.4	50.59253111
MT	-70	0.6	54.19310964
MT	-70	0.8	54.87486217
MT	-30	-0.8	44.28116689
MT	-30	-0.6	47.43718997
MT	-30	-0.4	46.35156373
MT	-30	-0.2	46.84677509
MT	-30	0	45.72414
MT	-30	0.2	57.81898648
MT	-30	0.4	59.50675798
MT	-30	0.6	52.57124495
MT	-30	0.8	50.94200227
MT	0	-0.8	45.57129054
MT	0	-0.6	55.59456148
MT	0	-0.4	49.34948783
MT	0	-0.2	53.08983973
MT	0	0	47.54577875
MT	0	0.2	50.9916961
MT	0	0.4	45.08063382
MT	0	0.6	43.41943812
MT	0	0.8	50.61072842
MT	30	-0.8	45.3850385
MT	30	-0.6	51.50165017
MT	30	-0.4	56.09282286
MT	30	-0.2	68.72700679
MT	30	0	47.02209085
MT	30	0.2	53.13525109
MT	30	0.4	41.40773038
MT	30	0.6	45.01607847
MT	30	0.8	52.41941788
MT	70	-0.8	49.49450726
MT	70	-0.6	58.63635451
MT	70	-0.4	70.95113532
MT	70	-0.2	73.46534653
MT	70	0	43.02619643
MT	70	0.2	34.0252646
MT	70	0.4	40.4432342
MT	70	0.6	46.52172853
MT	70	0.8	53.02737619
MT	100	-0.8	56.88052665
MT	100	-0.6	55.71268384
MT	100	-0.4	78.75725504
MT	100	-0.2	98.06197658
MT	100	0	43.89224599
MT	100	0.2	35.79719085
MT	100	0.4	32.86438873
MT	100	0.6	37.36936074
MT	100	0.8	42.15371639
V4	-100	-1.2	14.53927574
V4	-100	-0.8	17.28194669
V4	-100	-0.4	16.08108056
V4	-100	0	11.5175885
V4	-100	0.4	15.83568397
V4	-100	0.8	17.24946353
V4	-100	1.2	13.59222928
V4	-70	-1.2	14.34995855
V4	-70	-0.8	15.38172377
V4	-70	-0.4	15.81643755
V4	-70	0	14.78955863
V4	-70	0.4	18.77744005
V4	-70	0.8	17.78199932
V4	-70	1.2	13.77826161
V4	-30	-1.2	12.99376746
V4	-30	-0.8	19.31957301
V4	-30	-0.4	16.90210425
V4	-30	0	16.96246277
V4	-30	0.4	19.1580029
V4	-30	0.8	13.96759195
V4	-30	1.2	14.86717479
V4	0	-1.2	15.63493023
V4	0	-0.8	14.59089374
V4	0	-0.4	17.08268091
V4	0	0	22.87122747
V4	0	0.4	15.75020724
V4	0	0.8	15.81587148
V4	0	1.2	17.86558595
V4	30	-1.2	16.42008996
V4	30	-0.8	18.82237979
V4	30	-0.4	17.3833222
V4	30	0	24.63681266
V4	30	0.4	20.63381728
V4	30	0.8	15.31529458
V4	30	1.2	13.80062018
V4	70	-1.2	13.37013755
V4	70	-0.8	15.56182071
V4	70	-0.4	26.70110106
V4	70	0	28.0587505
V4	70	0.4	13.82272574
V4	70	0.8	13.28498703
V4	70	1.2	13.67105708
V4	100	-1.2	10.56168584
V4	100	-0.8	16.19494349
V4	100	-0.4	23.56262089
V4	100	0	33.35996746
V4	100	0.4	13.09913343
V4	100	0.8	12.70025483
V4	100	1.2	15.96568842
