# Supplementary material for: Specialized contributions of mid-tier stages of dorsal and ventral pathways to stereoscopic processing in macaque
Source: eLife journal article supplement (doi:10.7554/elife.58749), 2021-02-24
Supplement: supp [file elife-58749-supp-v1.zip › elife_poa_e58749_Figure_3_figure_supplement_1.pdf]

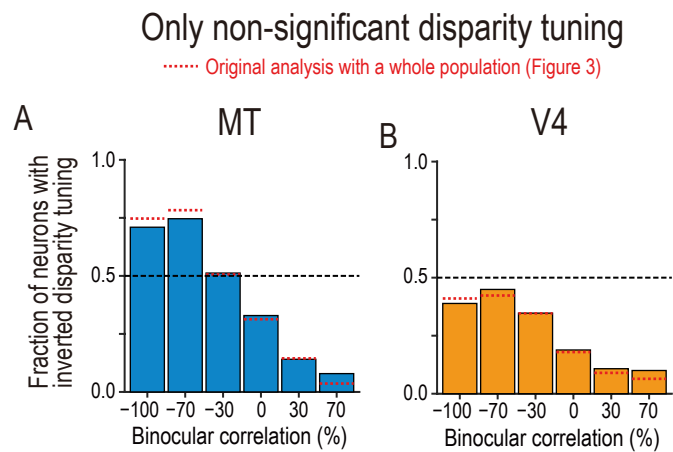

**Figure 3—figure supplement 1. Fractions of neurons with tuning inversion in a subpopulation of neurons with non-significant disparity tuning.**

**(A, B)** The fraction of neurons with inverted disparity tuning as a function of binocular correlation. The population comprises all neurons with non-significant disparity tuning judged at each correlation level (Kruskal-Wallis test;  $p > 0.05$ ). The results were similar to those reported in **Figure 3C,D**, which are shown by red dotted lines. We suggest that the similarity between the main and supplementary results warrants the inclusion of non-significant tuning in the main analysis.
