# Supplementary material for: Specialized contributions of mid-tier stages of dorsal and ventral pathways to stereoscopic processing in macaque
Source: eLife journal article supplement (doi:10.7554/elife.58749), 2021-02-24
Supplement: supp [file elife-58749-supp-v1.zip › elife_poa_e58749_Figure_3_source_data_1.csv]

Area	BinoCorr	KruskalWallisPvalue	TuningCorrelation
MT	-100	0.030242139	0.611641731
MT	-100	0.473828915	-0.084893227
MT	-100	0.229564734	0.02668242
MT	-100	0.546186426	0.219336335
MT	-100	0.024008902	-0.594729892
MT	-100	0.85909381	-0.412268472
MT	-100	0.72476555	-0.151098957
MT	-100	0.411625452	-0.394463106
MT	-100	0.40239208	-0.374552186
MT	-100	0.167827903	-0.285474993
MT	-100	0.033159752	-0.038210795
MT	-100	0.000117	-0.655717837
MT	-100	0.791717475	0.434288728
MT	-100	0.343497168	-0.047618247
MT	-100	0.034326365	-0.74122589
MT	-100	0.754054994	-0.052912189
MT	-100	0.743422146	-0.668933165
MT	-100	0.947519276	-0.110252209
MT	-100	0.278915874	-0.78090373
MT	-100	0.122742473	0.075983543
MT	-100	0.19815051	-0.685443095
MT	-100	0.047285313	-0.672333097
MT	-100	0.559753838	-0.455455806
MT	-100	0.36849622	0.039618438
MT	-100	0.250597501	-0.227983813
MT	-100	0.033558502	-0.161203847
MT	-100	0.382653331	-0.352556784
MT	-100	0.580753233	0.214005724
MT	-100	0.731707777	-0.119531304
MT	-100	0.376807311	0.480726268
MT	-100	0.446163976	0.90391459
MT	-100	0.044638012	0.530935004
MT	-100	0.855834313	0.473215472
MT	-100	0.520612292	-0.606470809
MT	-100	0.64491166	-0.494174503
MT	-100	0.718997235	0.042146052
MT	-100	0.183816447	-0.477258869
MT	-100	0.004702498	-0.484260627
MT	-100	0.464949085	-0.517031873
MT	-100	0.704755933	0.105551293
MT	-100	0.0039331	-0.422090322
MT	-100	0.725179333	-0.215688537
MT	-100	0.158947426	-0.689636344
MT	-100	0.484863954	-0.858674281
MT	-100	2.34e-08	-0.786658507
MT	-100	0.889899124	-0.265427782
MT	-100	0.912996445	-0.178682848
MT	-100	0.961255701	-0.903844772
MT	-100	0.049380277	-0.684128339
MT	-100	0.710744581	-0.482093303
MT	-100	0.020311995	-0.494221635
MT	-100	0.035299598	-0.778803531
MT	-100	0.02623634	0.262477804
MT	-100	0.583450636	-0.4153255
MT	-100	0.584312285	-0.547397102
MT	-100	0.635772404	-0.296418263
MT	-100	0.63488136	-0.189517597
MT	-100	0.304163675	-0.125747048
MT	-100	0.616894112	0.02420966
MT	-100	0.038183669	-0.510611784
MT	-100	0.834531147	-0.122561378
MT	-100	0.939922383	0.062271083
MT	-100	0.245363927	-0.380288424
MT	-100	0.246116124	-0.64222855
MT	-100	0.219210382	0.193015437
MT	-100	0.996297076	-0.426714258
MT	-100	0.414581886	-0.592824335
MT	-100	0.043963814	-0.605338919
MT	-100	0.160701876	0.088111894
MT	-100	0.830203219	-0.47912809
MT	-100	0.138966052	-0.376848399
MT	-100	0.65948	-0.367683856
MT	-100	0.039093486	-0.099515136
MT	-100	0.502054699	-0.228172991
MT	-100	0.066110891	-0.897197305
MT	-100	0.699850276	0.648763635
MT	-100	0.474661782	-0.661301854
MT	-100	0.611930895	0.180729508
MT	-100	0.375462659	-0.671108587
MT	-100	0.023190255	-0.60109748
MT	-100	0.698073727	0.059738959
MT	-100	0.028122381	-0.334009686
MT	-100	0.00915479	-0.46583606
MT	-70	0.646647014	-0.108006057
MT	-70	0.958205898	-0.670146669
MT	-70	0.504717867	-0.483649748
MT	-70	0.26346425	-0.139537609
MT	-70	0.115451695	-0.593590349
MT	-70	0.73288404	-0.268771947
MT	-70	0.87957398	-0.460254356
MT	-70	0.42990761	-0.190784094
MT	-70	0.946976615	0.012340988
MT	-70	0.021225766	-0.072678536
MT	-70	0.01031494	-0.076134806
MT	-70	6.39e-05	-0.720128903
MT	-70	0.297103099	-0.430609114
MT	-70	0.679223641	-0.207807356
MT	-70	0.022791915	-0.860929357
MT	-70	0.349410506	0.243612033
MT	-70	0.033996478	-0.621387961
MT	-70	0.4042982	-0.249552454
MT	-70	0.44843012	-0.277847701
MT	-70	0.986526957	-0.301661552
MT	-70	0.639084754	-0.119460535
MT	-70	0.195933856	-0.673038943
MT	-70	0.584239838	-0.403517472
MT	-70	0.672282265	-0.254694725
MT	-70	0.931362218	0.520558363
MT	-70	0.104119363	-0.425985415
MT	-70	0.74345234	-0.349143298
MT	-70	0.084242212	0.012366642
MT	-70	0.596147925	0.099648581
MT	-70	0.009109078	0.675572007
MT	-70	0.787366826	-0.233136113
MT	-70	0.029408483	-0.427850321
MT	-70	0.668962775	-0.082876681
MT	-70	0.139901244	-0.143370708
MT	-70	0.927220353	0.562616476
MT	-70	0.171488885	-0.087805719
MT	-70	0.143094913	-0.537489675
MT	-70	0.517257935	-0.700070418
MT	-70	0.863229572	-0.526598903
MT	-70	0.044036689	-0.08058889
MT	-70	0.161252838	-0.244790702
MT	-70	0.373719767	-0.097219486
MT	-70	0.274737776	-0.68088906
MT	-70	0.237003679	0.067438361
MT	-70	0.000105	-0.896362367
MT	-70	0.141098985	0.645274052
MT	-70	0.342445551	-0.45744989
MT	-70	0.031118522	-0.800384515
MT	-70	0.195403143	-0.630697084
MT	-70	0.032080032	-0.649266364
MT	-70	0.000928	-0.695267838
MT	-70	0.013399704	-0.648949808
MT	-70	0.146913255	-0.316409841
MT	-70	0.433562358	-0.437963385
MT	-70	0.511475727	0.418298138
MT	-70	0.669701754	-0.304635148
MT	-70	0.102986344	-0.233303914
MT	-70	0.027118715	-0.286998376
MT	-70	0.364258381	0.750317537
MT	-70	0.933208328	-0.290565525
MT	-70	0.317715562	-0.77101957
MT	-70	0.07853021	-0.795026686
MT	-70	0.306046275	0.393988778
MT	-70	0.411541711	0.166136101
MT	-70	0.053455842	-0.839031677
MT	-70	0.684443127	0.095370058
MT	-70	0.201556501	-0.562181734
MT	-70	0.060651717	-0.559777031
MT	-70	0.254768187	-0.367049142
MT	-70	0.033376008	-0.377760502
MT	-70	0.386480839	-0.373673508
MT	-70	0.818803634	0.389981137
MT	-70	0.411985811	0.165228388
MT	-70	0.400517211	-0.187911142
MT	-70	0.264664627	-0.148682781
MT	-70	0.70546457	0.207403896
MT	-70	0.033719955	-0.518362344
MT	-70	0.287566728	0.482071156
MT	-70	0.777351122	-0.469837401
MT	-70	0.110417376	-0.144008751
MT	-70	0.261848458	-0.691688234
MT	-70	0.774441522	-0.120509498
MT	-70	0.205897548	-0.89860769
MT	-30	0.728156098	0.344676485
MT	-30	0.191238492	-0.40754628
MT	-30	0.227330931	0.559230694
MT	-30	0.341644578	-0.100892444
MT	-30	0.364955969	-0.350093431
MT	-30	0.736050768	-0.472081509
MT	-30	0.844073583	0.641879442
MT	-30	0.895685843	-0.103367095
MT	-30	0.984272842	0.224630278
MT	-30	0.149476452	0.185709012
MT	-30	0.953139961	-0.111694844
MT	-30	0.165492296	-0.463500745
MT	-30	0.147930246	0.211766291
MT	-30	0.978383678	-0.278892704
MT	-30	0.914726452	-0.661731214
MT	-30	0.402340246	0.542587569
MT	-30	0.569768043	-0.451891701
MT	-30	0.87170002	0.247118906
MT	-30	0.760772025	-0.202966083
MT	-30	0.295201419	0.025592622
MT	-30	0.160172358	-0.666095592
MT	-30	0.175127781	-0.405543133
MT	-30	0.863012604	-0.482989892
MT	-30	0.256638595	-0.077754255
MT	-30	0.505570044	0.727992325
MT	-30	0.745047025	-0.14053909
MT	-30	0.905319567	-0.049552476
MT	-30	0.083146214	0.604026124
MT	-30	0.66380469	0.117077255
MT	-30	0.263176713	0.739080316
MT	-30	0.818749896	0.16874471
MT	-30	0.171565018	0.20367794
MT	-30	0.45271107	-0.466618056
MT	-30	0.506476208	0.039008463
MT	-30	0.377862582	0.508856945
MT	-30	0.089467646	0.192270092
MT	-30	0.329559366	-0.668783841
MT	-30	0.229498877	0.168521148
MT	-30	0.157216912	0.041169944
MT	-30	0.810026207	0.321477076
MT	-30	0.290753786	-0.559801071
MT	-30	0.694194476	-0.389578114
MT	-30	0.165021115	-0.553164256
MT	-30	0.715231642	-0.132386291
MT	-30	0.070390124	-0.627361873
MT	-30	0.344966255	0.647485647
MT	-30	0.519995454	-0.535404455
MT	-30	0.885168111	-0.421858677
MT	-30	0.55170456	-0.315506585
MT	-30	0.418538187	0.304048738
MT	-30	0.3650226	-0.105481857
MT	-30	0.375323958	-0.372477434
MT	-30	0.373697881	0.120933344
MT	-30	0.081355597	-0.232901526
MT	-30	0.751100044	0.141812898
MT	-30	0.25440709	-0.120044534
MT	-30	0.246937054	-0.584324029
MT	-30	0.594850809	0.66261474
MT	-30	0.492447106	0.698205119
MT	-30	0.027450797	0.425072222
MT	-30	0.637258706	0.455555191
MT	-30	0.300013448	-0.213271989
MT	-30	0.76690808	0.138851966
MT	-30	0.494510966	-0.296327174
MT	-30	0.124599052	-0.529769245
MT	-30	0.985625654	0.073696006
MT	-30	0.627385179	0.04211184
MT	-30	0.369124523	-0.196381065
MT	-30	0.546630419	0.275626593
MT	-30	0.543760589	-0.091435543
MT	-30	0.203391611	0.258452991
MT	-30	0.78818725	-0.03155957
MT	-30	0.390568908	-0.203523588
MT	-30	0.106793836	0.047737809
MT	-30	0.315505287	0.336736073
MT	-30	0.912025365	0.38991172
MT	-30	0.987672525	-0.243079689
MT	-30	0.279322237	0.339011568
MT	-30	0.277366452	-0.407064825
MT	-30	0.276073521	0.227955607
MT	-30	0.782301732	-0.069579615
MT	-30	0.231191275	0.278659287
MT	-30	0.755691457	0.560391493
MT	0	0.355630276	0.52338735
MT	0	0.488031431	0.234860863
MT	0	0.700810167	0.539821851
MT	0	0.350850257	-0.151471676
MT	0	0.01422913	0.397283971
MT	0	0.986821534	-0.07484204
MT	0	0.396890801	0.853750476
MT	0	0.745451528	-0.241021606
MT	0	0.679927683	0.136952531
MT	0	0.287899352	0.512750818
MT	0	0.533897429	0.027289596
MT	0	0.087973902	0.889356254
MT	0	0.099771844	0.702612938
MT	0	0.657461578	0.646062314
MT	0	0.461621943	0.717196316
MT	0	0.423614044	0.422849865
MT	0	0.809816235	-0.260265724
MT	0	0.89544662	-0.46534019
MT	0	0.653242921	-0.36668191
MT	0	0.89007927	0.408090436
MT	0	0.96767475	0.630380196
MT	0	0.420912772	-0.3655654
MT	0	0.366181339	0.299012908
MT	0	0.214357562	-0.676580665
MT	0	0.065001052	0.53466289
MT	0	0.3801986	-0.10345599
MT	0	0.813511807	0.186153448
MT	0	0.465212974	0.478172261
MT	0	0.759380913	0.382887841
MT	0	0.659450132	0.547568464
MT	0	0.547067164	-0.073298819
MT	0	0.194319069	0.119328459
MT	0	0.50508207	0.295274753
MT	0	0.452475121	-0.044223494
MT	0	0.852777934	0.027875009
MT	0	0.161477363	0.573226363
MT	0	0.129369903	-0.18451497
MT	0	0.112661161	0.524223862
MT	0	0.163269359	0.221712577
MT	0	0.011210129	0.540379066
MT	0	0.348999821	0.550929038
MT	0	0.449542458	-0.188269239
MT	0	0.087765183	0.074656079
MT	0	0.211462828	-0.256979225
MT	0	0.495455339	0.464256565
MT	0	0.630973669	0.445837911
MT	0	0.847875137	0.093149927
MT	0	0.91376474	-0.326043023
MT	0	0.532706669	0.104913861
MT	0	0.327475762	-0.255140835
MT	0	0.371709814	0.340088522
MT	0	0.728962469	0.558811239
MT	0	0.990555603	0.516771204
MT	0	0.05139161	0.026683622
MT	0	0.563022711	-0.012924333
MT	0	0.353636552	-0.153539122
MT	0	0.671894789	0.695266523
MT	0	0.075216675	0.846888794
MT	0	0.955315923	0.416394421
MT	0	0.953588522	0.75807583
MT	0	0.344144913	0.9394929
MT	0	0.047619964	0.780052502
MT	0	0.444041836	0.694763534
MT	0	0.002056978	0.676807912
MT	0	0.277264346	-0.486364661
MT	0	0.883605004	0.403209995
MT	0	0.146150114	0.243567171
MT	0	0.627448285	0.06553918
MT	0	0.091240307	-0.15472434
MT	0	0.328939742	-0.279572526
MT	0	0.741988928	0.537004166
MT	0	0.385038879	0.477018904
MT	0	0.673491204	-0.040035259
MT	0	0.685760758	0.479821937
MT	0	0.74921326	0.801503358
MT	0	0.930923533	0.200402206
MT	0	0.814695869	-0.396020116
MT	0	0.230512145	-0.382407426
MT	0	0.373430045	0.608659967
MT	0	0.846288192	-0.657796071
MT	0	0.518810788	0.098907614
MT	0	0.587629101	-0.139745206
MT	0	0.869619659	0.232944985
MT	30	0.030770748	0.847645265
MT	30	0.03214947	0.83668265
MT	30	0.003053388	0.672779449
MT	30	0.015903135	0.615556395
MT	30	0.025971582	-0.110794183
MT	30	0.434543891	0.148257762
MT	30	0.107323928	0.959335387
MT	30	0.457416131	0.036752946
MT	30	0.507322978	0.4616995
MT	30	0.03952513	0.204043031
MT	30	0.414261749	0.516506677
MT	30	9.89e-05	0.845050369
MT	30	0.492671406	0.384181629
MT	30	0.723066025	0.840470657
MT	30	0.040111781	0.638294728
MT	30	0.511913009	0.304215975
MT	30	0.340685726	-0.208303278
MT	30	0.268576035	0.135290833
MT	30	0.364936141	-0.026159325
MT	30	0.695071256	0.80711
MT	30	0.358696635	0.775850053
MT	30	0.793572357	0.132475983
MT	30	0.724248714	0.304601876
MT	30	0.157676991	0.653951073
MT	30	0.82603078	0.11217152
MT	30	0.05314631	0.869084299
MT	30	0.514080731	0.402823267
MT	30	0.062643546	0.92044775
MT	30	0.110470161	0.656287579
MT	30	0.001527418	0.802162882
MT	30	0.632597146	0.090263198
MT	30	0.570588154	0.703542454
MT	30	0.076749741	0.626645075
MT	30	0.377975864	-0.086876068
MT	30	0.440963847	0.644413718
MT	30	0.10306726	0.722334437
MT	30	0.497861714	-0.273789853
MT	30	0.504982806	0.425244121
MT	30	0.78408846	-0.352586593
MT	30	0.003229802	0.869412399
MT	30	0.124472077	0.749182833
MT	30	0.001417408	0.801279589
MT	30	0.686327676	-0.14851647
MT	30	0.257596932	0.122161473
MT	30	0.003005222	0.830995718
MT	30	0.869846411	0.518478154
MT	30	0.748187357	0.69432709
MT	30	0.320799292	0.688205353
MT	30	0.001252376	0.914753146
MT	30	0.343346869	0.158399681
MT	30	0.006672947	0.660863098
MT	30	0.383799939	0.82768941
MT	30	0.072938607	0.656585945
MT	30	0.736451158	0.594671384
MT	30	0.925473139	0.507458707
MT	30	0.057979862	0.337798506
MT	30	0.345819368	0.804128896
MT	30	0.005151078	0.853379385
MT	30	0.18002797	0.34300237
MT	30	0.015631364	0.657565607
MT	30	0.118959699	0.936051362
MT	30	0.12903775	0.818802801
MT	30	0.074633441	0.860840787
MT	30	0.005358034	0.865261809
MT	30	0.063137515	0.804283221
MT	30	0.662665606	0.815191177
MT	30	0.026319372	-0.030830691
MT	30	0.546728504	0.729382969
MT	30	0.312537573	0.823576302
MT	30	0.219655097	-0.031648167
MT	30	0.093288887	0.224871739
MT	30	0.100330441	0.40951699
MT	30	0.046053018	-0.013637874
MT	30	0.56432266	0.17334088
MT	30	0.089874605	0.485418255
MT	30	0.676091097	0.156533272
MT	30	0.906002682	0.642192222
MT	30	0.331986561	0.428638492
MT	30	0.803286559	-0.257452886
MT	30	0.906182406	-0.103546489
MT	30	0.079066877	0.865823923
MT	30	0.578958693	0.736965235
MT	30	0.156395299	0.262612169
MT	70	0.003381993	0.859133029
MT	70	0.000258	0.893965018
MT	70	2.14e-05	0.960825644
MT	70	0.041450331	0.805202964
MT	70	0.059695106	0.843486218
MT	70	0.007738104	0.54684912
MT	70	0.025317159	0.941582149
MT	70	0.3895284	0.211669282
MT	70	0.017565518	0.270780572
MT	70	0.016986941	0.470304918
MT	70	0.568687162	0.171835422
MT	70	1.25e-06	0.965789629
MT	70	0.010917458	0.72441141
MT	70	0.009716995	0.77679593
MT	70	0.00139479	0.813817027
MT	70	0.00018	0.711494688
MT	70	0.010419489	0.789258603
MT	70	0.22537617	0.92894875
MT	70	0.030713755	0.699137032
MT	70	0.168551143	0.861597695
MT	70	0.011726266	0.890754652
MT	70	0.0015535	0.833281403
MT	70	0.127055115	0.911930346
MT	70	0.019692892	0.507279764
MT	70	0.123467825	0.720527263
MT	70	0.001309452	0.875944163
MT	70	0.009821107	0.647893304
MT	70	0.072610223	0.741258628
MT	70	0.023698532	0.611389717
MT	70	1.49e-05	0.924255549
MT	70	0.822119176	0.342552907
MT	70	0.250850564	-0.260605311
MT	70	0.231711976	0.494233979
MT	70	0.17223331	0.380615432
MT	70	0.017857681	0.862332176
MT	70	0.000383	0.836757804
MT	70	0.551691103	0.325043522
MT	70	0.282986214	0.579418908
MT	70	0.683686008	0.562582839
MT	70	3.89e-05	0.969995082
MT	70	9.01e-05	0.939823111
MT	70	0.00021	0.95293106
MT	70	0.214136599	0.483372824
MT	70	0.010410576	0.956892978
MT	70	3.27e-07	0.917128117
MT	70	0.088251098	0.715689442
MT	70	0.052858837	0.762137412
MT	70	0.000456	0.830647596
MT	70	0.002291669	0.883952898
MT	70	0.005673622	0.890514539
MT	70	9.71e-05	0.950599627
MT	70	0.052903195	0.677366624
MT	70	0.000136	0.917028442
MT	70	0.005577421	0.945684905
MT	70	0.591798766	0.674798392
MT	70	0.109356353	0.8867638
MT	70	0.07456239	0.56494491
MT	70	0.028528237	0.936616752
MT	70	0.064139409	0.118521829
MT	70	0.045929606	0.769634165
MT	70	0.276765065	0.958282548
MT	70	0.003266845	0.97827128
MT	70	0.130003932	0.931542912
MT	70	0.001721282	0.931709891
MT	70	0.002471163	0.87104315
MT	70	0.255587751	0.672699335
MT	70	0.686237004	0.163034
MT	70	0.000753	0.845504485
MT	70	0.370001259	0.749000035
MT	70	0.398594694	0.061476704
MT	70	1.22e-05	0.953855603
MT	70	0.902057147	0.176508686
MT	70	0.00767145	0.716006479
MT	70	0.000303	0.654327256
MT	70	0.223188341	0.706194655
MT	70	0.720556837	-0.22152904
MT	70	0.016252918	0.924094605
MT	70	0.176136694	0.936866773
MT	70	0.40971392	0.575138205
MT	70	0.632251117	-0.593147383
MT	70	0.18491316	0.771346423
MT	70	0.333665943	0.509905967
MT	70	0.373030268	0.877890685
V4	-100	0.315184713	-0.283133932
V4	-100	0.272098365	-0.421385923
V4	-100	0.883653576	0.702420064
V4	-100	0.988646721	-0.191776853
V4	-100	0.911850708	0.537984924
V4	-100	0.177051759	-0.30154838
V4	-100	0.92398212	-0.065216859
V4	-100	0.95506745	0.371962625
V4	-100	0.784490286	0.732293326
V4	-100	0.780290866	-0.075969959
V4	-100	0.059700416	-0.765658537
V4	-100	0.892158147	0.660415271
V4	-100	0.200323923	0.897669983
V4	-100	0.747475438	-0.529771688
V4	-100	0.386594223	0.647773338
V4	-100	0.951018285	-0.151662781
V4	-100	0.938273428	0.4804681
V4	-100	0.678137208	0.542290455
V4	-100	0.975981853	0.655037
V4	-100	0.933208546	-0.078315649
V4	-100	0.596662981	0.115638303
V4	-100	0.556907105	0.765045116
V4	-100	0.393163962	-0.144521677
V4	-100	0.169846812	0.492628499
V4	-100	0.838532607	-0.524860551
V4	-100	0.538210637	0.327740371
V4	-100	0.024502299	-0.498220007
V4	-100	0.6490938	0.327740371
V4	-100	0.254775886	0.683948938
V4	-100	0.419498491	0.340428133
V4	-100	0.09696615	0.529858577
V4	-100	0.292418632	-0.412299451
V4	-100	0.02820019	0.539940338
V4	-100	0.618704094	0.5189312
V4	-100	0.081679723	0.345836081
V4	-100	0.059399155	0.358280901
V4	-100	0.178203547	-0.611383906
V4	-100	0.344273935	-0.452447383
V4	-100	0.570882979	-0.511752615
V4	-100	0.044769569	0.515002543
V4	-100	0.501168515	-0.056764888
V4	-100	0.396637804	0.497955385
V4	-100	0.738214961	-0.151526078
V4	-100	0.939532002	-0.836293596
V4	-100	0.021942182	-0.564990293
V4	-100	0.801566068	0.167086875
V4	-100	0.418198638	-0.382778302
V4	-100	0.412644134	0.425457644
V4	-100	0.161461542	0.722630328
V4	-100	0.952231091	-0.426541349
V4	-100	0.023777797	-0.153077784
V4	-100	0.355379815	-0.421052402
V4	-100	0.293230961	0.491398519
V4	-100	0.998278003	-0.369599509
V4	-100	0.259961787	0.158167857
V4	-100	0.982052184	0.494692786
V4	-100	0.338320727	0.2278778
V4	-100	0.807372033	-0.121066129
V4	-100	0.43858842	0.007468994
V4	-100	0.098770441	0.15110715
V4	-100	0.172368742	0.069265287
V4	-100	0.051551564	0.652354041
V4	-100	0.691392312	0.682927867
V4	-100	0.06856917	0.088133476
V4	-100	0.054331135	0.371882763
V4	-100	0.265301128	0.662910148
V4	-100	0.41428706	0.85823384
V4	-100	0.887539935	0.293408055
V4	-100	0.064905857	-0.261227428
V4	-100	0.495725004	-0.318777552
V4	-100	0.068001653	0.519583661
V4	-100	0.784777674	0.39980982
V4	-100	0.017896886	-0.131122546
V4	-100	0.849687583	0.031433299
V4	-100	0.135633422	0.776903408
V4	-100	0.198799595	0.835877223
V4	-100	0.929862158	-0.405565999
V4	-100	0.534630494	-0.624512146
V4	-70	0.992477884	-0.065875799
V4	-70	0.854973646	-0.682174983
V4	-70	0.774693636	0.033037779
V4	-70	0.109447158	0.399175872
V4	-70	0.39407856	-0.104551173
V4	-70	0.094408974	0.289510896
V4	-70	0.275942235	0.763182528
V4	-70	0.754961098	-0.54173202
V4	-70	0.047605144	0.744376725
V4	-70	0.602555304	0.787319968
V4	-70	0.571141652	-0.485087929
V4	-70	0.289734117	-0.165258643
V4	-70	0.816961002	0.146086374
V4	-70	0.432523967	0.0141262
V4	-70	0.378768963	0.249712182
V4	-70	0.799286523	0.730938719
V4	-70	0.545050242	0.129580332
V4	-70	0.544024767	-0.18079717
V4	-70	0.927906236	0.708479649
V4	-70	0.699593951	0.579896495
V4	-70	0.951564222	0.331439256
V4	-70	0.213920221	0.239115062
V4	-70	0.561523846	-0.103088767
V4	-70	0.382303562	-0.296470771
V4	-70	0.792256672	-0.305217003
V4	-70	0.127823859	0.428283087
V4	-70	0.332175718	0.074547297
V4	-70	0.654009158	0.428283087
V4	-70	0.576816821	0.351063059
V4	-70	0.157020314	-0.582062432
V4	-70	0.409719463	-0.100901831
V4	-70	0.957986341	-0.448593879
V4	-70	0.718809008	0.280029169
V4	-70	0.005954619	-0.514820123
V4	-70	0.220274681	-0.148311843
V4	-70	0.664973929	0.593113622
V4	-70	0.540055409	-0.283340065
V4	-70	0.359319143	-0.326608044
V4	-70	0.905340957	-0.52626974
V4	-70	0.60227718	-0.560837389
V4	-70	0.455579072	-0.681856583
V4	-70	0.203223327	0.088394269
V4	-70	0.463688276	0.667862142
V4	-70	0.869202722	-0.161028663
V4	-70	0.093522581	-0.075032862
V4	-70	0.860543771	-0.310480597
V4	-70	0.260196735	-0.377197655
V4	-70	0.030509114	0.593721183
V4	-70	0.68795876	0.628767498
V4	-70	0.508271224	0.302372302
V4	-70	0.068916098	-0.683653599
V4	-70	0.943559766	-0.326003454
V4	-70	0.257057011	0.694153661
V4	-70	0.177758729	-0.501799341
V4	-70	0.697197658	-0.623423126
V4	-70	0.483818087	0.285244951
V4	-70	0.546530033	-0.748574967
V4	-70	0.867484473	0.008665269
V4	-70	0.241339993	0.332564409
V4	-70	0.577870634	0.516190239
V4	-70	0.00462	0.445094674
V4	-70	0.005483447	0.807665746
V4	-70	0.971889682	-0.110525031
V4	-70	0.078147377	-0.196811353
V4	-70	0.033415373	0.613014225
V4	-70	0.037779496	0.555674109
V4	-70	0.6561309	0.648154422
V4	-70	0.672680272	0.715696546
V4	-70	0.666080868	0.090927701
V4	-70	0.790643811	0.147295182
V4	-70	0.49357348	0.444665972
V4	-70	0.73732698	0.569836091
V4	-70	0.026808786	-0.439551534
V4	-70	0.464866959	-0.016390423
V4	-70	0.028404268	0.339062209
V4	-70	0.154769006	0.590840916
V4	-70	0.560064149	0.02681563
V4	-70	0.444800856	0.658195638
V4	-30	0.58476596	0.394605592
V4	-30	0.035158136	-0.38266627
V4	-30	0.905806553	0.146162811
V4	-30	0.355513879	-0.372118185
V4	-30	0.170742794	0.717600005
V4	-30	0.672031326	0.446813837
V4	-30	0.661090868	0.01785655
V4	-30	0.169041073	-0.319563071
V4	-30	0.672984513	0.075171935
V4	-30	0.960152835	-0.112296635
V4	-30	0.091804271	0.791041018
V4	-30	0.217340969	0.313258338
V4	-30	0.35009107	0.825074279
V4	-30	0.195332848	0.646116805
V4	-30	0.708924061	0.057014278
V4	-30	0.810591904	-0.105850215
V4	-30	0.278778778	0.324750266
V4	-30	0.598633773	0.103644643
V4	-30	0.26110654	0.620255784
V4	-30	0.823748868	-0.205869387
V4	-30	0.313112077	-0.693199623
V4	-30	0.329715261	0.618419449
V4	-30	0.26021076	-0.442579476
V4	-30	0.330834153	-0.195323038
V4	-30	0.147263131	0.847268307
V4	-30	0.791926461	-0.301711099
V4	-30	0.002856118	0.60322799
V4	-30	0.955332894	-0.301711099
V4	-30	0.946705125	0.743548387
V4	-30	0.857799932	0.614325992
V4	-30	0.70247599	0.829267317
V4	-30	0.636569792	-0.485985457
V4	-30	0.125652295	0.37683878
V4	-30	0.364549089	0.348351263
V4	-30	0.002382266	0.49230471
V4	-30	0.41175854	0.917706066
V4	-30	0.150536736	0.287532521
V4	-30	0.511647955	0.231386527
V4	-30	0.333939816	-0.479167553
V4	-30	0.630241741	0.609870476
V4	-30	0.188553234	-0.657500772
V4	-30	0.894303748	0.373464094
V4	-30	0.075942514	0.09765867
V4	-30	0.546010292	-0.155749128
V4	-30	0.949062085	0.259788068
V4	-30	0.344750352	-0.485404061
V4	-30	0.376384257	0.537467225
V4	-30	0.076323373	0.315004898
V4	-30	0.842031677	0.188024661
V4	-30	0.532893208	0.085335652
V4	-30	0.558968541	-0.146200275
V4	-30	0.261013753	0.236114188
V4	-30	0.334841799	0.184782445
V4	-30	0.080060428	-0.511660404
V4	-30	0.459118628	-0.202900499
V4	-30	0.969986813	-0.315713757
V4	-30	0.092066489	-0.222403675
V4	-30	0.483991662	0.450546586
V4	-30	0.92491299	-0.087924691
V4	-30	0.158222447	-0.360465966
V4	-30	0.067191539	0.636771703
V4	-30	0.13084988	0.68529262
V4	-30	0.497152306	0.223076015
V4	-30	0.26335942	0.427068777
V4	-30	0.231385877	0.731955362
V4	-30	0.769044761	0.311384515
V4	-30	0.972084062	0.434417354
V4	-30	0.91894685	0.884677531
V4	-30	0.445322108	0.781430373
V4	-30	0.910819669	-0.166253676
V4	-30	0.010602194	-0.454360641
V4	-30	0.037535147	0.218420032
V4	-30	0.136964577	-0.411652946
V4	-30	0.699212839	0.393315804
V4	-30	0.526619258	0.397637923
V4	-30	0.500691384	-0.250704317
V4	-30	0.027062726	0.757511112
V4	-30	0.788162935	0.414143088
V4	0	0.849504233	0.736357844
V4	0	0.146043166	-0.314780345
V4	0	0.935411358	0.489844615
V4	0	0.915461256	0.16899733
V4	0	0.699239846	0.545137375
V4	0	0.301756039	0.079326633
V4	0	0.397568212	-0.37644093
V4	0	0.13162901	-0.625245488
V4	0	0.513127979	0.853549673
V4	0	0.564178415	0.135424121
V4	0	0.345032004	0.399928228
V4	0	0.63064777	0.64462279
V4	0	0.328460602	0.435266567
V4	0	0.75084794	0.19365778
V4	0	0.194370941	0.264466231
V4	0	0.995935055	-0.471231218
V4	0	0.520758245	0.310722831
V4	0	0.207097995	0.503831956
V4	0	0.014906875	0.421278329
V4	0	0.223968626	0.681821409
V4	0	0.90969471	-0.280861248
V4	0	0.351862467	0.235355582
V4	0	0.779554143	0.646654486
V4	0	0.723548067	0.487153464
V4	0	0.175547385	0.683461699
V4	0	0.025978025	0.223660303
V4	0	0.736774588	0.086517405
V4	0	0.928594547	0.223660303
V4	0	0.039635718	0.784933725
V4	0	0.608391531	0.619223119
V4	0	0.608770753	0.206668196
V4	0	0.391990665	0.065780546
V4	0	0.548404616	0.415939603
V4	0	0.081747574	0.841384991
V4	0	0.001009793	0.522703055
V4	0	0.351331369	0.608506504
V4	0	0.166075417	0.876062411
V4	0	0.865933763	0.048283689
V4	0	0.718298247	-0.580087973
V4	0	0.400083696	0.120296046
V4	0	0.012711458	-0.128892787
V4	0	0.911917975	0.982052493
V4	0	0.108806527	0.357992999
V4	0	0.829644481	0.497117942
V4	0	0.776969288	-0.060059672
V4	0	0.415828258	0.651666542
V4	0	0.008088709	0.277555551
V4	0	0.095261483	0.904134416
V4	0	0.212216396	0.218420032
V4	0	0.060781708	-0.497264635
V4	0	0.356634925	0.838652814
V4	0	0.094942671	0.618621523
V4	0	0.146694564	0.677715144
V4	0	0.520336271	-0.498967827
V4	0	0.004744833	0.840506164
V4	0	0.707507019	0.278394439
V4	0	0.613193768	0.499519121
V4	0	0.389320726	0.27232446
V4	0	0.606990827	0.068661339
V4	0	0.598851019	-0.384606869
V4	0	0.00048	0.653041293
V4	0	0.005549618	0.468774733
V4	0	0.209457666	0.342021704
V4	0	0.126790746	0.860039839
V4	0	0.406033313	0.817994857
V4	0	0.066211792	0.546047664
V4	0	0.057170392	0.85979584
V4	0	0.328437898	0.627242919
V4	0	0.119881114	0.69763668
V4	0	0.723687203	0.350780108
V4	0	0.431341246	-0.298815875
V4	0	0.618689402	0.188024661
V4	0	0.572581097	-0.685043523
V4	0	0.461620297	0.073541983
V4	0	0.431284429	-0.352657792
V4	0	0.559046878	0.344820604
V4	0	0.612977332	0.294053396
V4	0	0.618274336	0.71939833
V4	30	0.91521056	-0.554837022
V4	30	0.00316274	0.770892162
V4	30	0.642869203	0.490936328
V4	30	0.212627338	0.01382486
V4	30	0.443873956	0.35195347
V4	30	0.080490304	0.288373642
V4	30	0.771191061	0.822438396
V4	30	0.711014127	0.389335165
V4	30	0.488090589	0.725673588
V4	30	0.251948998	-0.051452429
V4	30	0.353538664	0.648184431
V4	30	0.260782904	-0.000495
V4	30	0.330697449	0.553884825
V4	30	0.842728592	0.743437698
V4	30	0.041651765	0.789589857
V4	30	0.261147085	0.613277061
V4	30	0.34334974	-0.01358117
V4	30	0.067254606	0.663187908
V4	30	0.000711	0.832492022
V4	30	0.052812136	0.657785358
V4	30	0.16553379	0.848749097
V4	30	0.788685116	0.630349663
V4	30	0.064632277	0.476253129
V4	30	0.645849359	0.376094354
V4	30	0.632302328	0.417445818
V4	30	0.801990992	0.269900698
V4	30	0.652466689	0.206889948
V4	30	0.390142868	0.269900698
V4	30	0.199422087	0.235213294
V4	30	0.267245818	0.054465119
V4	30	0.171684977	0.46123671
V4	30	0.74035608	0.019969246
V4	30	0.164829549	0.846762
V4	30	0.497985722	0.820986236
V4	30	0.019124672	0.556037479
V4	30	0.338588474	0.796628344
V4	30	0.025179213	0.682715902
V4	30	0.816512544	0.172341973
V4	30	0.711269071	0.870188329
V4	30	0.177634614	0.668025498
V4	30	0.925167366	0.385844412
V4	30	0.591007969	0.843153375
V4	30	0.277173743	0.747531129
V4	30	0.832463383	0.433905675
V4	30	0.390091855	0.654837052
V4	30	0.72330736	0.287470439
V4	30	0.358456389	0.40553016
V4	30	0.043874844	0.462068805
V4	30	0.780699949	0.569836091
V4	30	0.550357559	0.252543516
V4	30	0.200409441	0.717576647
V4	30	0.802271788	0.879268824
V4	30	0.990100498	0.04351363
V4	30	0.964977413	0.338354997
V4	30	0.038828401	0.324647037
V4	30	0.379755226	-0.351962764
V4	30	0.122428913	0.241029806
V4	30	0.077186308	0.059605676
V4	30	0.441541736	0.554158439
V4	30	0.802286405	-0.215774391
V4	30	0.260803788	0.455348213
V4	30	0.018639565	0.642049374
V4	30	0.035027947	0.762026073
V4	30	0.606784913	0.154603589
V4	30	0.580541961	0.252843225
V4	30	0.036009648	0.516292668
V4	30	0.845685652	0.877871037
V4	30	0.699991103	0.488963821
V4	30	0.174241744	0.542347768
V4	30	0.775014926	0.254055762
V4	30	0.048295945	0.60083465
V4	30	0.059115994	0.628767498
V4	30	0.085105493	0.501618572
V4	30	0.02314999	0.801981407
V4	30	0.242857361	0.539719556
V4	30	0.594525543	-0.182892017
V4	30	0.042378601	0.892942905
V4	30	0.192964015	0.334065532
V4	70	0.485084165	0.661375682
V4	70	2.41e-05	0.911279184
V4	70	0.757160292	0.69680208
V4	70	0.271592007	-0.261724969
V4	70	0.199311214	0.782091346
V4	70	0.150042451	0.694607528
V4	70	0.144483557	0.623830019
V4	70	0.786121016	-0.018389797
V4	70	0.49565443	0.654398393
V4	70	0.006708575	0.755779913
V4	70	0.006343405	0.965044885
V4	70	0.044883893	0.279644228
V4	70	0.011021202	0.811964217
V4	70	0.009379949	0.848304564
V4	70	0.33100985	0.745901614
V4	70	0.585959537	-0.759619539
V4	70	0.665019289	0.318373086
V4	70	0.542675852	0.308504902
V4	70	0.84277371	0.742202014
V4	70	0.000152	0.866451819
V4	70	0.38503043	0.884883777
V4	70	0.159437877	0.637130955
V4	70	0.006840715	0.9799397
V4	70	0.148393235	0.626010564
V4	70	0.342718157	0.650630131
V4	70	0.545296988	0.157622032
V4	70	0.124813393	0.448517531
V4	70	0.058939918	0.157622032
V4	70	0.011453694	0.597981145
V4	70	0.478457573	0.251285067
V4	70	0.144762399	0.554987289
V4	70	0.239319155	0.787663856
V4	70	0.0017	0.918083708
V4	70	0.548	0.349876398
V4	70	1.79e-06	0.826771669
V4	70	0.058851915	0.852975265
V4	70	7.85e-05	0.935073768
V4	70	0.349698326	0.674157131
V4	70	0.000841	0.869311608
V4	70	0.001563581	0.785915975
V4	70	0.251562288	0.806146698
V4	70	0.158017942	0.738831011
V4	70	0.033214394	0.619402126
V4	70	0.493865924	0.188381695
V4	70	0.711655073	-0.003925301
V4	70	0.057962282	0.738814513
V4	70	0.00604066	0.883847233
V4	70	0.220016686	0.604405784
V4	70	0.167067677	0.39980982
V4	70	0.00058	0.608475386
V4	70	1.23e-05	0.938949067
V4	70	0.070689392	0.869960503
V4	70	0.010950673	0.784264006
V4	70	0.763706065	0.424845584
V4	70	0.096271579	0.732362723
V4	70	0.946604513	0.341242782
V4	70	0.487277083	0.274461372
V4	70	0.862426179	-0.204396241
V4	70	0.228791219	0.187067812
V4	70	0.147595035	0.71229389
V4	70	0.000209	0.76992074
V4	70	0.003779799	0.621221676
V4	70	0.019926067	0.932903935
V4	70	0.099896064	0.623496175
V4	70	0.014670858	0.890725771
V4	70	0.035458637	0.812041979
V4	70	0.235562538	0.863230374
V4	70	0.183684462	0.632203514
V4	70	0.044724107	0.934833029
V4	70	0.639383137	0.648500982
V4	70	0.216285386	0.358433257
V4	70	0.596077473	0.722630328
V4	70	0.33649142	0.827797185
V4	70	0.0883973	0.900259012
V4	70	0.016183449	0.524175229
V4	70	0.562884868	0.540427148
V4	70	0.016373135	0.889173997
V4	70	0.010642755	0.900490845
