# Supplementary material for: Specialized contributions of mid-tier stages of dorsal and ventral pathways to stereoscopic processing in macaque
Source: eLife journal article supplement (doi:10.7554/elife.58749), 2021-02-24
Supplement: supp [file elife-58749-supp-v1.zip › elife_poa_e58749_Figure_4_source_data_1.csv]

Area	BinoCorr	SignedAmpRatio
MT	-100	-0.667548862
MT	-70	-0.473420759
MT	-30	-0.165671779
MT	0	0.060002753
MT	30	0.269208135
MT	70	0.676589224
MT	100	1
V4	-100	-0.1787898
V4	-70	-0.179356229
V4	-30	0.128915607
V4	0	0.326798841
V4	30	0.446457289
V4	70	0.887651855
V4	100	1
