# Supplementary material for: Specialized contributions of mid-tier stages of dorsal and ventral pathways to stereoscopic processing in macaque
Source: eLife journal article supplement (doi:10.7554/elife.58749), 2021-02-24
Supplement: supp [file elife-58749-supp-v1.zip › elife_poa_e58749_Figure_5_figure_supplement_1.pdf]

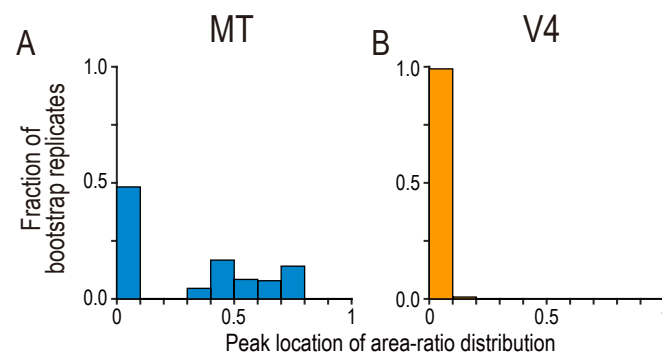

**Figure 5—figure supplement 1. Bootstrap distribution for peak location of area-ratio distribution.**

(A, B) The fraction of bootstrap replicates is plotted against the binned area ratio. For each bootstrap replicate, we resampled the observed area-ratio values with replacement, constructed a histogram with the same bins used in **Figure 5A,B**, and registered the location of the peak bin. We repeated the process 50,000 times. The peak distribution for MT consisted of two clusters with an approximately equal size, whereas the peak distribution for V4 was almost entirely concentrated at around zero.
