# Supplementary material for: Specialized contributions of mid-tier stages of dorsal and ventral pathways to stereoscopic processing in macaque
Source: eLife journal article supplement (doi:10.7554/elife.58749), 2021-02-24
Supplement: supp [file elife-58749-supp-v1.zip › elife_poa_e58749_Figure_5_figure_supplement_1_source_data_1.csv]

BinCenter	MT	V4
0.05	0.4824	0.9911
0.15	0.0011	0.0081
0.25	0	0.0008
0.35	0.0455	0
0.45	0.1671	0
0.55	0.0839	0
0.65	0.0783	0
0.75	0.1411	0
0.85	0.0005	0
0.95	0	0
1.05	0	0
1.15	0	0
1.25	0	0
1.35	0	0
1.45	0	0
