# Supplementary material for: Specialized contributions of mid-tier stages of dorsal and ventral pathways to stereoscopic processing in macaque
Source: eLife journal article supplement (doi:10.7554/elife.58749), 2021-02-24
Supplement: supp [file elife-58749-supp-v1.zip › elife_poa_e58749_Figure_5_figure_supplement_3.pdf]

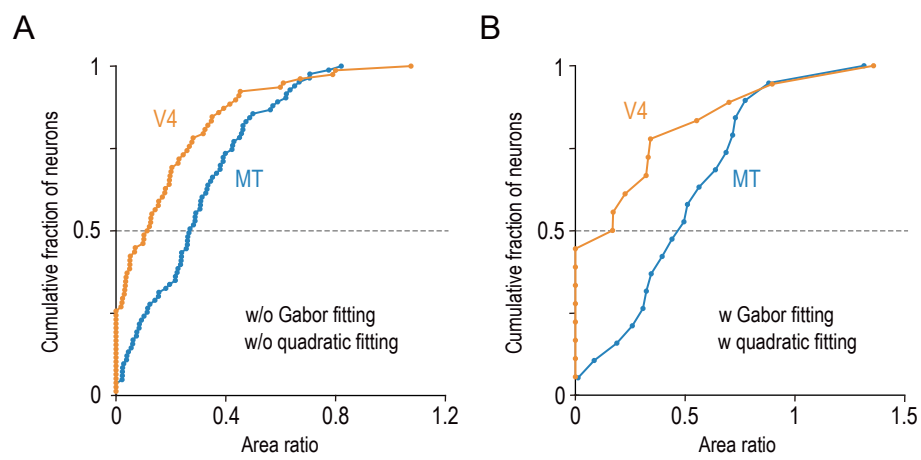

**Figure 5-figure supplement 3: The differential distributions of the area ratios between V4 and MT hold in two control analyses. (A)** We quantified the area ratio without model fitting (see Methods) and confirmed that the area ratio significantly differed between MT and V4 (two-sided Mann-Whitney U-test,  $p = 2.3 \times 10^{-5}$  for the median difference). This analysis included our whole data set (MT,  $n = 83$ ; V4,  $n = 78$ ). **(B)** We analyzed only the data obtained from MT and V4 of the same individual monkey and confirmed the same result (Monkey O; MT,  $n = 28$ ; V4,  $n = 30$ ; two-sided Mann-Whitney U-test,  $p = 9.9 \times 10^{-3}$ ).
