# Supplementary material for: Specialized contributions of mid-tier stages of dorsal and ventral pathways to stereoscopic processing in macaque
Source: eLife journal article supplement (doi:10.7554/elife.58749), 2021-02-24
Supplement: supp [file elife-58749-supp-v1.zip › elife_poa_e58749_Figure_5_figure_supplement_4.pdf]

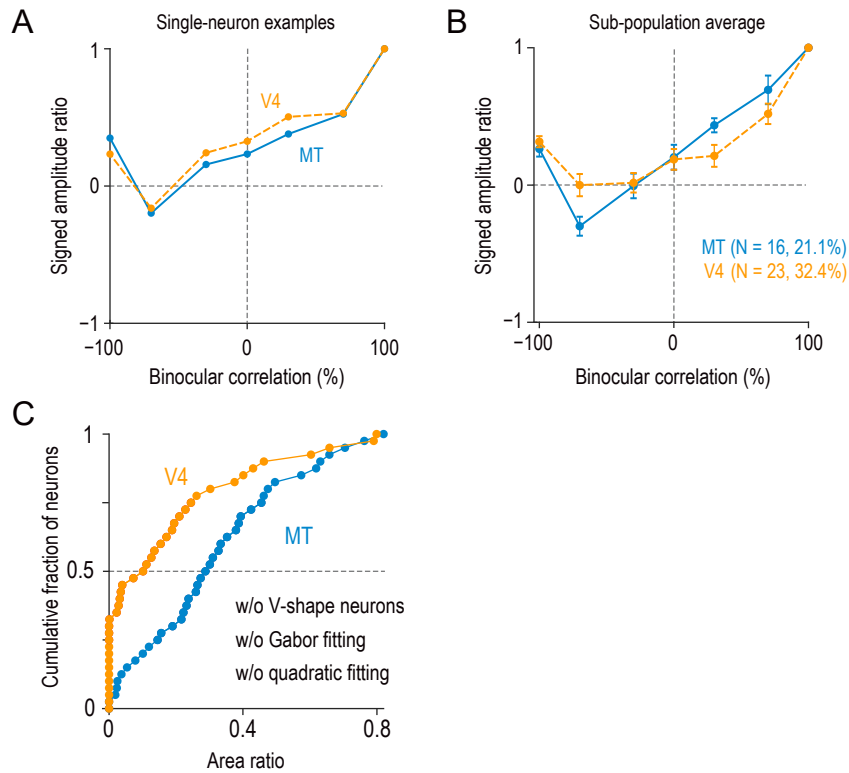

**Figure 5—figure supplement 4: Neurons with V-shape signed amplitude-ratio functions.**

**(A)** Example single neurons with V-shape signed amplitude-ratio functions. The signed amplitude ratios were calculated based on the Gabor functions fitted to disparity-tuning data (we did not use the peak-to-trough difference of raw disparity-tuning data because it was more susceptible to neuronal noise). **(B)** The average signed amplitude-ratio functions for the subpopulation of neurons similar to the examples in (A) (i.e., neurons with positive values at  $-100\%$  correlation and negative minima at correlation levels above  $-100\%$ ). The average curve for the V4 subpopulation did not have a large negative minimum, because the location of the minimum varied between  $-70\%$  and  $-30\%$  correlations. Error bars indicate  $\pm$ SEMs. **(C)** Model-free area-ratio distribution similar to **Figure 5—figure supplement 3A** but without the subpopulation of neurons summarized in (B). The area ratio significantly differed between MT and V4 (two-sided Mann-Whitney U-test,  $p = 3.3 \times 10^{-5}$  for the median difference;  $N = 67$  for MT,  $55$  for V4).
