# Supplementary material for: Specialized contributions of mid-tier stages of dorsal and ventral pathways to stereoscopic processing in macaque
Source: eLife journal article supplement (doi:10.7554/elife.58749), 2021-02-24
Supplement: supp [file elife-58749-supp-v1.zip › elife_poa_e58749_Figure_5_figure_supplement_4_source_data_1.csv]

Area	SignedAmpRatio_m100	SignedAmpRatio_m70	SignedAmpRatio_m30	SignedAmpRatio_0	SignedAmpRatio_p30	SignedAmpRatio_p70	SignedAmpRatio_p100	Example	StrongViolation
MT	-1.29356164730423	-0.850811962831382	-0.804594995431166	0.339539158191898	0.647587868269983	1.3500502712364	1	0	0
MT	0.277121013968566	-0.062379326327973	-0.160722955601904	-0.042986428000853	0.423095176595888	0.911773581951306	1	0	1
MT	-0.151595774354684	-0.296429946513572	-0.327480770940133	0.37291062326923	0.170483088509696	0.535159655507815	1	0	0
MT	-0.712774207115913	-0.340559717076365	-0.244135105739784	-0.351877970744083	-0.283084756121604	1.00317416505658	1	0	0
MT	0.126782322845862	-0.457613587634687	-0.490653029639321	0.460593699287288	0.622588240048277	0.630394353275123	1	0	1
MT	-0.312456490720401	-0.501340615181071	0.187106521974459	0.457853335548822	0.393157072253383	0.648494186898416	1	0	0
MT	-0.351196208094735	0.160453006270913	0.384496883340034	0.364967357319769	0.910861518853244	0.346846809725768	1	0	0
MT	-0.898056668936767	-0.412510099399633	0.172703205564763	0.178633256082338	0.518109616694289	0.705204756056115	1	0	0
MT	0.002000976133016	-0.390086548517399	-0.148444184007755	0.317947169148388	0.329417787922723	0.618637056455972	1	0	1
MT	-1.34899363249793	-0.722000495029436	-0.991929984884237	0.834636158438256	0.974033522041765	1.00507998363253	1	0	0
MT	-0.237777048770733	0.060747595359119	-0.245792799209768	0.219672188014049	0.451348389879649	0.498293494336622	1	0	0
MT	0.129573115581291	-0.32312603541819	-0.283825427015039	-0.306084250469818	0.31571322941428	0.642473765695848	1	0	1
MT	-0.535762541335205	-0.484669137491414	0.140359928797327	-0.058785614835474	0.233118058172058	0.492129216336549	1	0	0
MT	-0.77002091706439	-0.577996740412051	0.551853718178656	0.625330373220323	0.499641316400922	0.969316025889947	1	0	0
MT	-0.267112189080256	-0.560832815999689	-0.344705772291995	-0.336172338715076	-0.064718866455943	0.117953314958698	1	0	0
MT	-0.234630894904322	-0.349786609287159	-0.375525233102566	0.127207766426771	0.171427737997653	0.811128216609932	1	0	0
MT	-0.338980813606754	0.060699528864278	-0.21252579112996	0.295942690815913	0.431383778035159	0.260591858614631	1	0	0
MT	-0.187894433237586	-0.093234480243632	0.107934705346846	0.122326607761321	0.170074336996322	1.16631304505173	1	0	0
MT	-0.52563125150887	-0.244342964409077	0.138371562741116	0.282221180663214	0.391238119333815	0.525456468076808	1	0	0
MT	0.44586389268352	0.167256924161233	0.202988146069086	0.219665004960286	-0.018598213897284	-0.125350303827288	1	0	1
MT	-0.227706935517004	-0.272407281788391	-0.037419476504547	-0.044465286818807	0.120360001667012	0.508792756355873	1	0	0
MT	-0.617361833361077	0.14754849667074	-0.658235047756133	0.243877087250801	-0.074151169858263	0.570392527261131	1	0	0
MT	-0.516890068907143	-0.49799557120862	0.415379647253186	-0.240488750369279	-0.090607096144638	-0.124358820525808	1	0	0
MT	0.576456722290056	-1.02236437930193	0.464050862191321	0.790205339010965	0.807747170498314	1.31666657054646	1	0	1
MT	0.754036117205845	-0.392696789263108	0.543378544251484	-0.362239105772898	0.62818339480748	0.892859486141727	1	0	1
MT	-0.369131584697294	-0.670254255389586	0.367861713030922	0.079337225582975	0.355455992524995	0.604149420126434	1	0	0
MT	0.349440449359858	-0.197467973538626	0.156929950926289	0.233328759125466	0.379096118717683	0.524406099058044	1	1	1
MT	0.15268358981461	-0.160915375773354	-0.06818227314685	0.12163743617217	0.282838562469235	0.767995805205799	1	0	1
MT	0.257376506575593	-0.207400217875898	0.319097021189903	0.109179592863204	0.385744638691275	0.90157962260465	1	0	1
MT	0.066999440227747	-0.577682626474857	-0.694279913660664	0.872400708878993	0.468643618727155	0.971413098588909	1	0	1
MT	-0.5113251678797	-0.398217629354991	-0.164038485197301	0.206431078361446	-0.347598311768841	0.580172896791343	1	0	0
MT	-0.172716082810174	-0.38147322448164	-0.287467184649222	0.041720340708479	0.391849412068467	0.837504600050249	1	0	0
MT	0.06926728969374	-0.100853226410255	0.211308675272245	0.439705415881356	0.748185881075402	1.07966031177111	1	0	1
MT	-0.290975165295063	-0.317299666827812	-0.10022199512191	-0.305178666781194	0.455571028923022	0.371929508821017	1	0	0
MT	-0.393334129071058	-0.127352802719202	-0.137568714725641	-0.305459487036835	0.368952042228701	0.74993868072455	1	0	0
MT	-0.508174177162533	-0.15187790437199	0.212232444482522	0.427675827283493	0.784114864019861	0.997165718114583	1	0	0
MT	-0.770705944629002	0.108754088156464	-0.274125855494119	0.39563416746632	0.484175798029826	0.361682193983195	1	0	0
MT	-0.300727334387167	-0.249962068895035	-0.04566371728563	0.112137090045737	0.427065021118181	0.731200897637732	1	0	0
MT	-0.171639958186348	-0.179965946444909	0.129037946400133	0.436483642545501	0.174405759678917	0.436629635142789	1	0	0
MT	0.17205216227549	-0.205281691210867	-0.127813559400087	-0.29852143727774	0.304853381572419	0.814289721879401	1	0	1
MT	-0.356833167359282	-0.437163194761699	-0.1625360149458	0.234540338520772	0.592175955094003	0.936412355721099	1	0	0
MT	0.189759957578302	0.271134124503364	0.141516762862137	0.420530450001856	0.354590597255459	0.887817642555573	1	0	0
MT	-0.35601781815154	-0.31055501564224	-0.352618609884092	-0.133061103636324	-0.350784477257578	0.945932263288492	1	0	0
MT	-0.174311170273268	-0.577894989024285	0.090936550994753	-0.182563621043892	0.299891973782746	0.841307733307851	1	0	0
MT	-0.599670016457118	-0.387034816906247	-0.57518321288099	-0.603563660122872	0.117343632662492	1.23875662766361	1	0	0
MT	-0.379189404368515	-0.079738929819029	-0.152242192941068	0.159541509485048	0.243210038271107	0.667298326354115	1	0	0
MT	-0.313022702414802	-0.135037330123558	-0.281863143148951	0.114695950228542	0.40565854392302	0.584646168431118	1	0	0
MT	-0.366566382092297	-0.36727266738024	-0.2410110293299	-0.088549413446804	0.06961959112323	0.75506515068297	1	0	0
MT	-0.305845378436039	-0.22986255779866	-0.129273998711438	-0.216412703871799	-0.053095571588901	0.617982995815684	1	0	0
MT	-0.331052674628322	-0.147188217856093	-0.202474123904967	-0.152513199286029	0.592350904469361	0.632393469147772	1	0	0
MT	-0.160863742509017	0.316329085645145	0.706593467405981	0.891591499719437	-0.300694534319977	0.722032012406318	1	0	0
MT	-0.106811924366191	-0.22988058115929	-0.139952965789411	0.298058380355584	0.130536824740381	0.548267288672866	1	0	0
MT	-0.405039569005504	-0.289266543288971	-0.174781161364338	-0.192043686850119	0.351407960257679	1.03907786087851	1	0	0
MT	-0.439729706127461	-0.626515598113953	0.043194958356684	0.617831623616887	0.579585460840103	0.532181418452665	1	0	0
MT	0.544293547900812	-0.507091049351433	-0.382021384846549	0.280338828390922	0.399780177937355	-0.286123586257839	1	0	1
MT	-0.448972105888176	-0.228703811880943	-0.50761630862166	0.036064140731641	0.59032436546667	0.664400777168796	1	0	0
MT	-0.214794594286344	-0.507181925553025	0.152637887458516	-0.369608842070627	-0.104620735788766	-0.248997742443129	1	0	0
MT	-0.124416861659162	0.219774216477181	0.222660683640853	-0.123008761751639	0.66306631568219	0.936124126208307	1	0	0
MT	0.215121716165143	-0.144351738772052	0.260619992847818	0.206854776365749	0.383820842392829	0.668529471878934	1	0	1
MT	-0.477154353511382	-0.464888932164389	-0.64875743877984	-0.506598295875161	0.053597569195523	0.337077053259403	1	0	0
MT	-0.646749105773731	-0.584287048942417	0.234612993021567	0.300602130561057	0.322039503903088	0.90289802797898	1	0	0
MT	-0.336539604629493	-0.2524834593751	0.485570043807389	0.354114892918181	-0.272731775925958	0.65206890514639	1	0	0
MT	0.06660581783725	-0.220516602266402	0.091598236967296	0.195444190206596	0.500836827031137	0.760945576243651	1	0	1
MT	-0.544153657691442	-0.232674944734548	-0.281124440028236	0.218678210464039	0.377804552567208	0.9580293141718	1	0	0
MT	-0.167426187237664	-0.01649362717932	0.092242601672583	-0.035155001021307	0.44814146277728	0.931007105127619	1	0	0
MT	-0.619401380748927	-0.510422181110579	-0.381636682853379	0.163674105429738	-0.251556370177334	0.577149848715753	1	0	0
MT	-0.371873183567381	0.298518449226162	0.085590207253514	-0.486860193501787	0.148135219003093	0.692659515722789	1	0	0
MT	-0.667548861518675	-0.47342075948544	-0.165671778608208	0.060002752871546	0.269208135404367	0.676589224281606	1	0	0
MT	-0.177001346795897	0.228431877009175	0.26977865400714	0.190976981460153	0.194235211527958	0.607651469509421	1	0	0
MT	-0.130360199252818	-0.177304685842519	-0.306473688989999	-0.10390505015153	0.273178786643852	0.442537121143796	1	0	0
MT	-0.024619337716306	-0.278685506921243	0.130221371056005	0.378124519034741	0.802815150332674	0.511858666659495	1	0	0
MT	-0.21450708711019	-0.499953617238927	-0.144757482629613	-0.175019466641785	0.298261658552492	0.6370094279517	1	0	0
MT	-0.355230961560341	-0.218925468340071	-0.043691853665732	-0.108462332413382	0.675318820063025	0.506569840561523	1	0	0
MT	-0.202160724182302	-0.382090233686668	-0.034048186573654	-0.09116098771706	0.098887781550094	0.526644393394	1	0	0
MT	-0.211566699918477	-0.395727521496088	-0.079563999523727	0.115641190373098	0.354405277351183	0.568608975808784	1	0	0
MT	-0.101437291757031	0.084201619334346	0.06156474980066	-0.339638918646101	0.591438304827077	0.637803806798928	1	0	0
V4	-0.122955485789306	-0.08168263276672	0.129648300095907	0.308236531738203	-0.099155485784141	0.70509899455341	1	0	0
V4	-0.009878621449243	-0.055501618605436	-0.126025728341698	-0.23144236905899	0.408607297524632	0.660654280192507	1	0	0
V4	0.319279093541882	0.412346639721146	0.119411112852057	0.182565812634242	0.653259223519833	0.732840662375137	1	0	0
V4	0.14182957363589	-0.169879922594487	0.450906172510275	0.165359965588622	0.293849540504032	0.554983171251429	1	0	1
V4	-0.336395878211237	-0.463303545977999	-0.117891142942395	-0.176989677304625	-0.472285122571958	0.490099814669679	1	0	0
V4	0.189025180628348	0.327834423960897	0.140314503516258	-0.421626944322886	0.462160773173059	0.687620488004868	1	0	1
V4	0.337996043719422	-0.197722883123551	-0.43645244669244	-0.737687489440322	0.074260422202711	-0.175953746386392	1	0	1
V4	0.118372839442206	0.410128142298924	0.006570574115015	0.329354413893068	0.470542113634462	0.487637128383467	1	0	0
V4	-0.128962781400247	0.198330953503748	-0.040725426373031	0.055558214750929	-0.132575291044164	0.48875934790054	1	0	0
V4	-0.883194603914919	-0.444966231857898	0.594326156331292	0.664789802742345	0.457246785231949	1.217461660389	1	0	0
V4	0.260087499386711	-0.501852214246063	0.545955217629667	0.052847932892466	0.393573344073223	0.59240133469198	1	0	1
V4	0.443402807081733	0.143945102197089	0.15005372417802	0.314629017759872	0.361130288061495	0.933269605330081	1	0	0
V4	-0.528958637695567	0.157552426071504	0.220729435991551	0.403912201727622	0.313234130638836	1.05726951613387	1	0	0
V4	0.134036969270766	0.089383892636299	0.417217537313523	0.403659575543951	0.625528189034337	0.48981629839661	1	0	0
V4	-0.222136430713435	0.058451151972703	-0.165134820728222	-0.098501854074227	0.266720370775521	-0.257233097047706	1	0	0
V4	0.799573025216786	0.872907172901369	0.294777145003488	0.200766465597349	-0.589288525227117	0.586344272756737	1	0	1
V4	0.245125334278962	-0.23506921486083	-0.122133566504974	0.324170215489546	0.583255062662095	0.222963999986011	1	0	1
V4	0.081578805798278	0.18550454314302	0.337146388524705	0.443300503454197	0.74693300106447	0.29018132615035	1	0	0
V4	0.063978348117103	0.033821033020801	-0.110436498019638	0.252809240385106	0.35623202446638	0.763848298110808	1	0	1
V4	-0.183985267861842	0.073825553996987	-0.468822666740081	-0.136608596522838	0.433739232932886	0.629457490043736	1	0	0
V4	0.462315164856199	0.347615458587129	0.515863521079581	0.153382862534971	0.354445645958786	0.739212965178415	1	0	0
V4	-0.08953480401554	-0.153876506166583	-0.248838115934227	0.318990727229274	0.398317934509294	0.808016994324426	1	0	0
V4	0.480928689883914	-0.238202370500439	-0.157460247780704	0.326583991805677	0.353855721393035	0.517967759243001	1	0	1
V4	-0.142203414019823	-0.146406342553023	0.432283871572635	0.203697328683457	0.111303347815688	0.389605747444098	1	0	0
V4	0.228620135936757	0.645709756421468	-0.11637294963741	0.542139540067304	0.343108266462442	0.106391709061919	1	0	1
V4	-0.529311262980385	0.801222596964587	0.590707375521434	0.364860796010862	-0.533083340729564	1.05014644537143	1	0	0
V4	-0.176075788512887	-0.985081845967916	0.188305207316877	-0.060396909992742	0.350447824115563	0.72000028085122	1	0	0
V4	0.942283392821278	0.312055544157394	0.249907739138713	0.909892256761014	0.756335386803158	1.35373011638211	1	0	0
V4	0.503141926675123	-0.320924853245097	0.265861611244223	-0.179490958476216	0.426151027808492	0.610773887278733	1	0	1
V4	-0.530937408563211	-0.361354788131424	-0.49849528156277	0.247112792711738	-0.114076459018701	0.909995509735965	1	0	0
V4	0.474474760599871	0.263048060177019	0.493143690985659	0.379823322032401	0.476749008779387	0.992389583021601	1	0	0
V4	0.350232854806264	-0.391510838118797	0.422643881948461	0.63425259462173	0.393465223363862	0.476806225001407	1	0	1
V4	0.06749631866964	-0.162751957869406	0.428529825706205	0.311668132306787	0.343855125403098	0.764573775192962	1	0	1
V4	0.317838499770015	0.481120120779529	0.678331798425292	0.463831262351879	0.340748713555219	0.847853419086056	1	0	0
V4	-0.178789800248573	-0.179356228678743	0.128915606665715	0.326798841207564	0.446457288928432	0.887651854833372	1	0	0
V4	-0.591419722544155	-0.154750171390672	0.716009789388807	0.578103428075599	0.655364996095255	1.36125612126614	1	0	0
V4	0.208844266577058	-0.141420813143536	-0.239908443305542	-0.301923007701412	0.112073316641167	0.976824725479297	1	0	1
V4	0.511690430363508	-0.302850653784541	0.19137052384269	0.215536996775492	0.453129913151131	1.1866196939016	1	0	1
V4	-0.369257936293493	-0.44925066274446	-0.46587771214069	-0.443090042442265	0.457671430976143	0.760977002972515	1	0	0
V4	0.253465798520954	-0.23574794234926	0.213055071512368	0.105634567034585	0.251994509301982	0.574994443745256	1	0	1
V4	0.045031488797147	0.482731479971898	-0.312243544846492	0.376909002792979	0.274613477222727	0.40400836711272	1	0	1
V4	-0.299269416804175	-0.03375935340663	-0.10444697355427	0.059373536666172	0.39748773748859	0.328060607085382	1	0	0
V4	-0.867889732257949	-0.329723367400112	0.357450343632716	-0.469623394009242	0.372975928372719	0.571687025671107	1	0	0
V4	0.172200662886189	-0.330805646610544	-0.516754216162077	0.611169841163134	0.398872156542249	0.730110962766237	1	0	1
V4	-0.145323279908323	-0.197069248270177	0.038118495457752	0.075723878921544	-0.37587987641982	0.595747554389555	1	0	0
V4	0.458341975522733	0.76265044980743	0.447207047101732	0.710894364367415	0.576010218584323	0.559086018440744	1	0	0
V4	0.536991067573472	0.555555555555556	-0.267787235368853	0.625395927055634	-0.546672892185861	0.670908224243546	1	0	1
V4	-0.156108381540317	0.153866473839818	0.120736856592046	-0.25155956393663	0.24051196857531	0.777671169084945	1	0	0
V4	0.412847054862954	-0.293100649207688	-0.206597723249768	0.190979220802898	0.220287343922889	0.866047839259583	1	0	1
V4	-0.179950168076695	-0.108836859610415	0.127795926352006	0.417113738311416	0.289024512643872	0.579372777229185	1	0	0
V4	-0.337987710072818	-0.716665089073119	-0.640556981829954	-0.086039342027795	0.291022181226336	0.329775317444485	1	0	0
V4	-0.402352770369091	-0.252755419496524	-0.298047409015051	0.754545563534738	0.55938394699815	0.62350120999458	1	0	0
V4	0.331659033814738	0.10807367824121	-0.269342840049924	0.273973988068397	-0.099242947869819	0.235188812820731	1	0	1
V4	0.268241712797674	0.201190860953623	0.420443588414997	0.603076386848393	-0.771116641027881	-0.380890977730733	1	0	1
V4	-0.210649761901704	0.439069710304848	-0.240856153915209	0.046549795358287	0.202710826685844	0.357545944181708	1	0	0
V4	-0.878058500016414	0.371551632201805	-0.832827462934241	-0.484393477779062	-0.144980116391035	0.920523396684232	1	0	0
V4	0.220549500730611	0.452229262698718	0.424210933911569	0.481022072423479	0.34690108643337	0.652623679337866	1	0	0
V4	0.45805469361117	0.47389203492901	0.490019291969694	0.571880583888578	0.492786551124716	0.367242185907561	1	0	0
V4	0.232865861929088	-0.161258852888221	0.242021425477457	0.326128488996702	0.503930713948303	0.530257531676187	1	1	1
V4	0.278919995001537	0.365570875141426	0.203172799226451	0.211606927190865	0.189110369238498	0.692179399463546	1	0	0
V4	0.154423709364124	0.311198589547133	0.138953887662045	0.174616551597587	0.185446052097264	0.771280232548726	1	0	0
V4	0.433440639238488	0.284316711939176	0.117142184384484	0.530992254849817	0.316191272846273	0.701358559103436	1	0	0
V4	0.199178866233511	0.263317130281406	0.268069201603131	0.259039558252412	0.268718187018409	0.657938017160796	1	0	0
V4	-0.317421628314187	-0.14122526949699	0.278821822046976	0.355088408945873	0.328688903936774	0.470041932036232	1	0	0
V4	-0.417592518335897	-0.194218418559623	-0.442928669237287	0.49727426192472	0.718183978516403	0.721567554389079	1	0	0
V4	0.614528768579882	0.437371808189929	-0.486808790752101	-0.212572386513735	0.652040608642288	0.421812374727654	1	0	1
V4	0.309449164964965	0.961549837625985	1.76359307366045	0.56732950604161	1.2455346253475	0.852159242025716	1	0	0
V4	-0.448625174500962	-0.58870888500259	-0.536158371567574	-0.252539020488789	0.476939341451232	0.241923631510258	1	0	0
V4	-0.107934869239328	-0.447664173660728	0.318801276437591	-0.484980709566293	0.611693258405059	0.644619804273403	1	0	0
V4	-0.252016396452097	0.088993319230642	1.04554676349176	0.285775366987765	0.893624795825613	0.891616024938914	1	0	0
V4	-0.313616617003197	0.11902264477792	-0.211514428420047	0.208355933234372	0.401090662601704	0.729847826877822	1	0	0
