# Supplementary material for: Specialized contributions of mid-tier stages of dorsal and ventral pathways to stereoscopic processing in macaque
Source: eLife journal article supplement (doi:10.7554/elife.58749), 2021-02-24
Supplement: supp [file elife-58749-supp-v1.zip › elife_poa_e58749_Figure_5_figure_supplement_5.pdf]

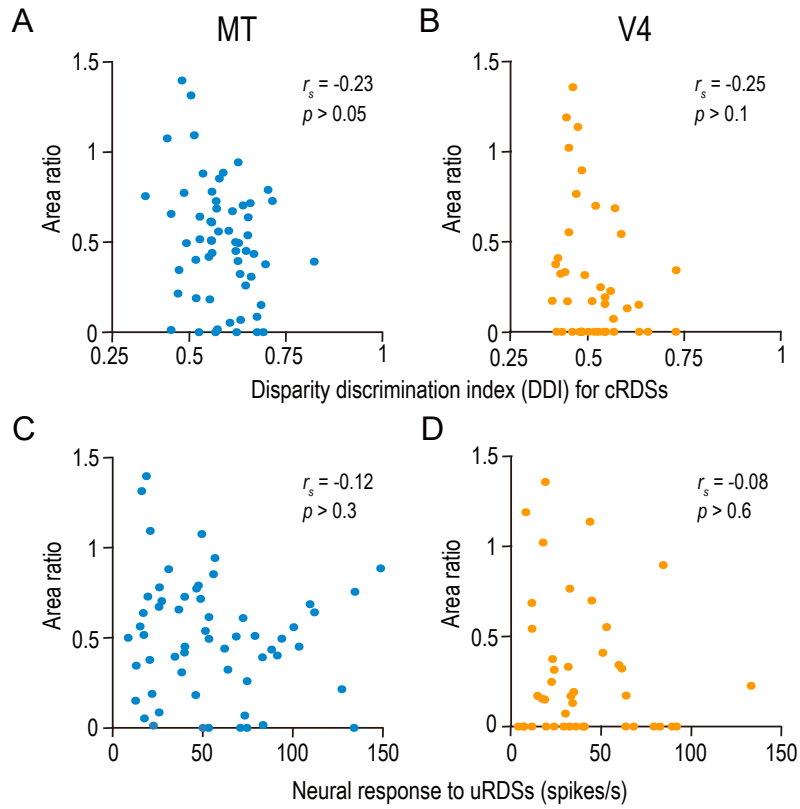

**Figure 5-figure supplement 5: The area ratio is correlated neither with the strength of disparity selectivity nor with the responsiveness in MT and V4. (A, B)** The area ratio is plotted against the disparity discrimination index (DDI) calculated from the responses to correlated random dot stereograms (cRDSs). The DDI quantifies the strength of disparity selectivity. **(C, D)** The area ratio is plotted against the average firing rate for uncorrelated RDSs, which is often taken as the baseline response level (Uka and DeAngelis, 2003).  $r_s$ , Spearman's correlation coefficient. The analyses were performed in the same population of neurons as in Figure 6.
