# Supplementary material for: Specialized contributions of mid-tier stages of dorsal and ventral pathways to stereoscopic processing in macaque
Source: eLife journal article supplement (doi:10.7554/elife.58749), 2021-02-24
Supplement: supp [file elife-58749-supp-v1.zip › elife_poa_e58749_Figure_5_source_data_1.csv]

Area	AreaRatio	AmpRatio	AreaRatioWOfits	isMonkeyO	DDI	ResponseURDS
MT	NaN	0.06699944	0.429370075	0	NaN	NaN
MT	0.942857958	0.511325168	0.704886105	0	0.625129887	56.50398773
MT	0.558744893	0.172716083	0.344565434	0	0.574134164	100.2235923
MT	0.015843123	0.06926729	0.084032774	0	0.571290626	83.23201307
MT	0.755085668	0.290975165	0.486954086	0	0.384866751	134.2089584
MT	0.656345853	0.393334129	0.060673524	0	0.451443452	36.46969547
MT	NaN	0.770705945	0.449923362	0	NaN	NaN
MT	0.214405418	0.508174177	0.238428738	0	0.469230921	126.9851419
MT	0.391678628	0.300727334	0.222534074	0	0.822208756	82.88231798
MT	NaN	NaN	0	0	NaN	NaN
MT	0	0.349440449	0.039596489	0	0.674142753	133.7463118
MT	0	0.257376507	0.055145358	0	0.690453334	74.2882199
MT	0.068110069	0.15268359	0.238900184	0	0.631430463	73.10034973
MT	0.401704929	0.439729706	0.027962052	0	0.515391409	91.13106276
MT	0.377120303	0.106811924	0.282170985	0	0.69596146	20.32874035
MT	NaN	0.544293548	0.571252994	0	NaN	NaN
MT	0.614614412	0.599670016	0.634010671	0	0.553976318	53.17454261
MT	1.075870996	0.356017818	0.618678016	0	0.441419316	49.20496672
MT	0.609612198	0.17431117	0.366083775	0	0.556842928	72.11965631
MT	0.641107837	0.405039569	0.308645391	0	0.525828303	111.7925354
MT	NaN	NaN	0	0	NaN	NaN
MT	0.450773196	0.379189404	0.045095445	0	0.619008051	103.1992449
MT	0.852910497	0.366566382	0.498564951	0	0.576449768	55.67690238
MT	0.494987264	0.313022702	0.331395891	0	0.626315218	93.61269943
MT	NaN	NaN	0.235039119	0	NaN	NaN
MT	NaN	0.160863743	0.074364669	0	NaN	NaN
MT	0.182143427	0.171639958	0.092567481	0	0.55173304	45.81940663
MT	0.434248755	0.356833167	0.216366453	0	0.665841219	87.96905963
MT	0.417946292	0.172052162	0.255949888	0	0.54913966	39.61181832
MT	0	0.189759958	0.023264042	0	0.566629212	70.65049304
MT	0.671719627	0.448972106	0.288153717	0	0.610242614	25.42860777
MT	NaN	0.214794594	0.620587512	0	NaN	NaN
MT	NaN	0.124416862	0.022024197	0	NaN	NaN
MT	0	0.215121716	0.115314831	0	0.621153215	53.04013271
MT	1.397238616	0.477154354	0.774819801	0	0.479488111	18.44529436
MT	0.507039433	0.646749106	0.237027268	0	0.556314859	68.31733905
MT	0.885270166	0.305845378	0.259887797	0	0.586151196	148.4852468
MT	NaN	0.336539605	0.261307587	0	NaN	NaN
MT	0.052298539	0.066605818	0.085094357	0	0.603993116	17.35302937
MT	0.515694807	0.331052675	0.379969051	0	0.525726058	17.02970297
MT	0.537882848	0.544153658	0.307582677	0	0.650076181	51.23201096
MT	0.150902721	0.167426187	0.265637274	0	0.684395091	12.4637974
MT	1.093023596	0.619401381	0.650609256	0	0.511480141	20.60725949
MT	NaN	0.371873184	0.269471617	0	NaN	NaN
MT	0	0.177001347	0.023072411	0	0.523521814	49.83811779
MT	0.703561768	0.130360199	0.422383975	0	0.637697849	26.96725156
MT	0.789904627	0.667548862	0.390218238	0	0.702580675	47.3455917
MT	0.779857763	0.214507087	0.456989751	0	0.557232727	25.68907934
MT	0.450899955	0.355230962	0.287911752	0	0.64572337	39.79585296
MT	0.500042475	0.2115667	0.334460694	0	0.618243667	8.330742581
MT	0.727333777	0.202160724	0.313397791	0	0.568118346	39.68991625
V4	0.171851677	0.122955486	0.229245119	1	0.407006694	63.61080552
V4	0.341919052	0.009878621	0.258469797	1	0.727784743	59.5878907
V4	0	0.319279094	0	1	0.516333372	63.34625349
V4	NaN	NaN	0.414654159	0	NaN	NaN
V4	0	0.141829574	0.153986632	1	0.654645906	40.44423915
V4	NaN	0.336395878	0.031806912	0	NaN	NaN
V4	0	0.118372839	0	1	0.545619549	6.849447622
V4	0.331453678	0.128962781	0.200304509	1	0.439777223	31.48139329
V4	0.322029605	0.883194604	0.193649816	1	0.428371449	61.21552673
V4	NaN	0.260087499	0.452691438	0	NaN	NaN
V4	0	0.443402807	0	1	0.525867345	23.57535754
V4	0.169287453	0.528958638	0.021834058	1	0.446240251	32.94573164
V4	0	0.134036969	0	1	0.432485808	89.13342419
V4	NaN	0.222136431	0.799598963	0	NaN	NaN
V4	NaN	0.799573025	0.098203396	0	NaN	NaN
V4	NaN	0.245125334	0.130361692	0	NaN	NaN
V4	NaN	0.081578806	0	0	NaN	NaN
V4	0	0.063978348	0.049605944	1	0.566544459	39.51860703
V4	0.55229193	0.183985268	0.267081186	1	0.449735475	52.74245831
V4	0	0.462315165	0	1	0.482649174	67.76015721
V4	0.226257897	0.089534804	0.317711071	1	0.558044912	132.9734492
V4	NaN	0.189025181	0.177595387	0	NaN	NaN
V4	1.357649988	0.337996044	1.074502683	1	0.46013873	18.75701901
V4	NaN	0.529311263	0.06758908	0	NaN	NaN
V4	0.699332543	0.176075789	0.023715579	1	0.519212754	44.52968623
V4	NaN	0.942283393	0	0	NaN	NaN
V4	NaN	NaN	0.168781769	0	NaN	NaN
V4	NaN	0.503141927	0.069989967	0	NaN	NaN
V4	0.896242522	0.530937409	0.374095515	1	0.483404662	84.20114333
V4	0	0.48092869	0.324102173	1	0.481790108	79.05426425
V4	NaN	0.142203414	0.10137363	0	NaN	NaN
V4	NaN	0.228620136	0.050449058	0	NaN	NaN
MT	0.494210081	0.369131585	0.326921593	1	0.491129216	53.16577894
MT	NaN	0.351196208	0	0	NaN	NaN
MT	0.562928288	0.898056669	0.141697708	1	0.600771255	15.00411704
MT	0.085453645	0.024619338	0.113549135	1	0.67386587	25.51630417
MT	NaN	0.754036117	0.29052522	0	NaN	NaN
MT	0.307763694	0.002000976	0.260258298	1	0.658606747	38.04717669
MT	0.773172293	1.348993632	0.038294102	1	0.485002413	46.29952288
MT	0.188689654	0.187894433	0.155940442	1	0.516280086	21.58887795
MT	NaN	NaN	0.588817847	0	NaN	NaN
MT	NaN	0.126782323	0.351422639	0	NaN	NaN
MT	0.439775878	0.712774207	0.473252565	1	0.557577729	61.88498426
MT	0.728484048	0.129573116	0.424810677	1	0.713781506	19.24224225
MT	0.259098428	0.237777049	0.195205739	1	0.644326136	74.3770639
MT	NaN	NaN	0.024030969	0	NaN	NaN
MT	NaN	NaN	0.667247748	0	NaN	NaN
MT	0.715959689	0.535762541	0.3902642	1	0.656534199	48.55300946
MT	NaN	0.516890069	0.820504662	0	NaN	NaN
MT	NaN	0.617361833	0.562335054	0	NaN	NaN
MT	NaN	0.445863893	0.061947032	0	NaN	NaN
MT	0.345146033	0.770020917	0.462159527	1	0.471973927	12.80558656
MT	NaN	0.338980814	0.123269205	0	NaN	NaN
MT	1.314159366	0.267112189	0.706024566	1	0.502855425	15.85435329
MT	0.686134838	0.234630895	0.18136182	1	0.569399381	109.2996171
MT	NaN	0.101437292	0.101917783	0	NaN	NaN
MT	0.637613049	0.227706936	0.398339298	1	0.651126629	16.7412464
MT	NaN	0.576456722	0.305856627	0	NaN	NaN
MT	NaN	NaN	0.154600397	0	NaN	NaN
MT	0.51021111	0.151595774	0.379102084	1	0.555638794	78.71749758
MT	0.880549658	1.293561647	0.462468414	1	0.534000333	30.81241943
MT	0.012089979	0.277121014	0.075689772	1	0.4512446	22.37977369
MT	0.395005469	0.525631252	0.216042076	1	0.624582353	34.27403737
MT	0.322977009	0.312456491	0.225712664	1	0.630065455	63.6819289
V4	NaN	0.51169043	0.051980042	0	NaN	NaN
V4	1.02142193	0.369257936	0.609460345	0	0.44978553	17.52263325
V4	0	0.253465799	0	0	0.482117536	35.62769603
V4	0.409179544	0.299269417	0.392261556	0	0.421447269	50.64432823
V4	0.765235963	0.867889732	0.789523036	0	0.468963587	32.33770072
V4	NaN	0.045031489	0.018197026	0	NaN	NaN
V4	NaN	0.172200663	0.334466397	0	NaN	NaN
V4	0.685932672	0.14532328	0.155428949	0	0.569425344	11.2312429
V4	NaN	0.458341976	0	0	NaN	NaN
V4	NaN	0.536991068	0	0	NaN	NaN
V4	0.17039105	0.156108382	0.194508188	0	0.510189098	14.41425825
V4	0.071985915	0.412847055	0.347333093	0	0.565302792	29.89452752
V4	0.130458925	0.179950168	0.126187873	0	0.601027312	33.87766341
V4	0	0.474474761	0	0	0.500213535	91.64289168
V4	NaN	0.350232855	0.196734796	0	NaN	NaN
V4	0	0.067496319	0.050548397	0	0.632330549	19.16995755
V4	NaN	0.3178385	0	0	NaN	NaN
V4	0.149772491	0.1787898	0.113350644	0	0.630978363	18.41021346
V4	0.154292139	0.591419723	0.179905271	0	0.543350522	17.02852998
V4	0.542905908	0.208844267	0.276373255	0	0.585654154	11.35928049
V4	NaN	NaN	0	0	NaN	NaN
V4	1.189844577	0.33798771	0.671080653	0	0.443606414	7.930806107
V4	0.314874857	0.40235277	0.203415012	0	0.491080395	23.69178103
V4	NaN	0.331659034	0.349979074	0	NaN	NaN
V4	NaN	NaN	0.435777262	0	NaN	NaN
V4	NaN	0.268241713	0.121589655	0	NaN	NaN
V4	NaN	0.210649762	0.03658163	0	NaN	NaN
V4	NaN	0.8780585	0.447666916	0	NaN	NaN
V4	0	0.220549501	0	0	0.54076252	11.28605745
V4	NaN	0.458054694	0	0	NaN	NaN
V4	0	0.232865862	0.035070947	0	0.458832779	32.21850385
V4	NaN	NaN	0.126993296	0	NaN	NaN
V4	0	0.278919995	0	0	0.727196737	82.34245315
V4	0	0.154423709	0	0	0.477778854	3.68373131
V4	0.1916605	0.317421628	0.040085029	0	0.54368824	34.51178451
V4	0.374439368	0.417592518	0.244678721	0	0.415557393	22.76528035
V4	NaN	0.614528769	0.280841295	0	NaN	NaN
V4	NaN	0.309449165	0	0	NaN	NaN
V4	1.136860262	0.448625175	0.598625005	0	0.473228247	43.53725672
V4	NaN	0.107934869	0.101583159	0	NaN	NaN
V4	NaN	NaN	0.142478416	0	NaN	NaN
V4	NaN	NaN	0.225968551	0	NaN	NaN
V4	NaN	0.252016396	0.030036364	0	NaN	NaN
V4	0	0.433440639	0	0	0.482560036	6.675152935
V4	0	0.199178866	0	0	0.418261477	28.9574142
V4	0.247533298	0.313616617	0.033733465	0	0.531886004	22.22185215
