# Supplementary material for: Specialized contributions of mid-tier stages of dorsal and ventral pathways to stereoscopic processing in macaque
Source: eLife journal article supplement (doi:10.7554/elife.58749), 2021-02-24
Supplement: supp [file elife-58749-supp-v1.zip › elife_poa_e58749_Figure_6_figure_supplement_1.pdf]

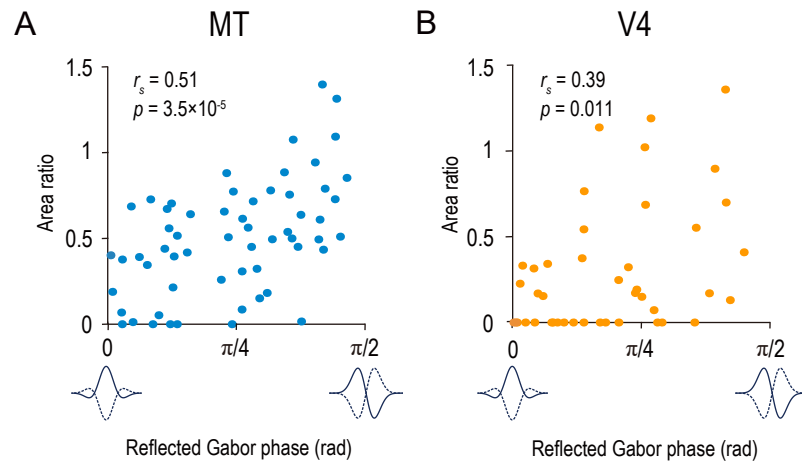

Figure 6 - figure supplement 1: The area ratio is correlated with the symmetry of the disparity-tuning curve as quantified by the Gabor function's phase parameter in MT and V4. The area ratio is plotted against the best-fitted values of the phase parameter of the Gabor function for 59 MT neurons (A) and 43 V4 neurons (B). The analyses were performed in the same population of neurons as in Figure 6.
