# Supplementary material for: Specialized contributions of mid-tier stages of dorsal and ventral pathways to stereoscopic processing in macaque
Source: eLife journal article supplement (doi:10.7554/elife.58749), 2021-02-24
Supplement: supp [file elife-58749-supp-v1.zip › elife_poa_e58749_Figure_6_figure_supplement_2.pdf]

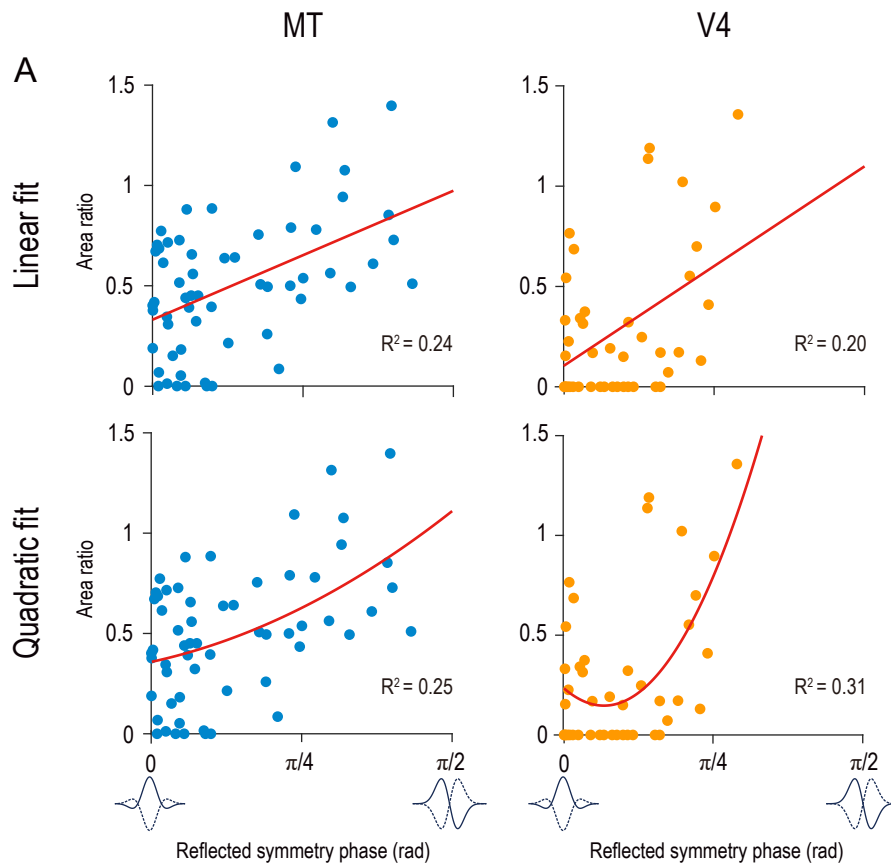

**Figure 6–figure supplement 2: Linear and quadratic regressions for area ratio as dependent variable and reflected symmetry phase as independent variable. Red curves indicate the best fitted linear functions (top row) and quadratic functions (bottom row). Data points are the same as in Figure 6.**
