# Supplementary material for: Specialized contributions of mid-tier stages of dorsal and ventral pathways to stereoscopic processing in macaque
Source: eLife journal article supplement (doi:10.7554/elife.58749), 2021-02-24
Supplement: supp [file elife-58749-supp-v1.zip › elife_poa_e58749_Figure_6_figure_supplement_2_source_data_1.csv]

Area	Model	b0	b1	b2
MT	Linear	0.3306	0.4093	0
V4	Linear	0.1041	0.6332	0
MT	Quadratic	0.3582	0.207	0.1728
V4	Quadratic	0.2359	-0.837	1.9672
