# Supplementary material for: Specialized contributions of mid-tier stages of dorsal and ventral pathways to stereoscopic processing in macaque
Source: eLife journal article supplement (doi:10.7554/elife.58749), 2021-02-24
Supplement: supp [file elife-58749-supp-v1.zip › elife_poa_e58749_Figure_6_source_data_1.csv]

Area	AreaRatio	RefSymPhase	RefGaborPhase
MT	0.880549658	0.178700334073685	0.723483661663686
MT	0.012089979	0.0763952960793661	0.151818919542125
MT	0.51021111	1.35652574344073	1.41775512664859
MT	0.439775878	0.172815669219391	0.345555676321313
MT	0.322977009	0.227976742632807	0.908495998873962
MT	0.562928288	0.928213611403206	0.854361418868958
MT	0.307763694	0.0815921563460461	0.81780933077804
MT	0.773172293	0.0452188405850807	0.76410609772756
MT	0.259098428	0.598746986105093	0.690484356722415
MT	0.728484048	1.25895708991148	1.38584803723405
MT	0.715959689	0.0799277279918037	0.885106756744984
MT	0.345146033	0.0752630283879005	0.239056068638923
MT	1.314159366	0.94072770591581	1.39519962551077
MT	0.686134838	0.0344966665397877	0.141199877700464
MT	0.188689654	0.00140914567680443	0.0275276652731441
MT	0.395005469	0.308034224684389	0.402803301327463
MT	0.637613049	0.376192249118079	1.17651209483254
MT	0.494210081	1.03511432192764	1.2856241064524
MT	0	0.311574997525322	0.757150768672145
MT	0.068110069	0.0332805120412859	0.0821766528008392
MT	0	0.172115254278866	0.379943332737614
MT	0.942857958	0.993593874170112	1.26425692216057
MT	0.558744893	0.210834837097238	0.371607591011804
MT	0.015843123	0.274928482584015	1.18031962973047
MT	0.755085668	0.553170164178729	1.10742051158432
MT	0.656345853	0.205352120173416	0.708862397285762
MT	0.214405418	0.39569016064828	0.39569016064828
MT	0.391678628	0.190691896904995	0.190691896904995
MT	0.182143427	0.149211513878574	0.97081439632564
MT	0.417946292	0.00929860531661591	0.482647189636121
MT	0.434248755	0.775271032133486	1.31443464422723
MT	0	0.0308735494138116	0.0864159493435198
MT	1.075870996	1.00369839539175	1.1293847806927
MT	0.609612198	1.15147222850744	1.2933352901339
MT	0.614614412	0.0560546743109879	0.820616183592797
MT	0.450773196	0.23823286140794	0.875463594112493
MT	0.494987264	0.600837907653209	1.00201201672963
MT	0.852910497	1.23281120390154	1.45766749365772
MT	0.885270166	0.310547549072743	1.0759412631069
MT	0.515694807	0.140282246760685	0.422178386009687
MT	0.377120303	0.00225435033954827	0.0872058525507825
MT	0.641107837	0.429997546230689	0.502372298005437
MT	0.401704929	0.000848374529731309	0.0170305800582956
MT	0.671719627	0.0164529668330066	0.35995517567382
MT	0	0.283060623973131	0.422135864553121
MT	1.397238616	1.24763772423548	1.30781098881621
MT	0.507039433	0.564174214483273	0.733831731714197
MT	0.052298539	0.148106021981295	0.309904245145067
MT	0.537882848	0.786736783460772	1.09610656515565
MT	0.150902721	0.105956209542691	0.92488104761539
MT	1.093023596	0.746908498037429	1.38777878782231
MT	0.789904627	0.723143634524417	1.32451047956634
MT	0	0.127644615400164	0.273446678152318
MT	0.703561768	0.0244014287244451	0.386828447197221
MT	0.085453645	0.660163944385529	0.817256237683412
MT	0.779857763	0.854577167744443	0.991782598350463
MT	0.450899955	0.202377921001187	1.15856926224109
MT	0.727333777	0.140595711734067	0.259917927752421
MT	0.500042475	0.719156689553229	1.12232426169047
V4	0.171851677	0.601312134205861	0.746102258548367
V4	0.341919052	0.0861036090603072	0.21083282647794
V4	0	0.00634667375311598	0.132447840390535
V4	0	0.504849776821614	0.565246625409909
V4	1.357649988	0.910304239915108	1.29656659724889
V4	0	0.19149637710217	1.10868282550368
V4	0.331453678	0.00799537215294194	0.0584571350361896
V4	0.322029605	0.338349629322586	0.703519726279251
V4	0	0.14267194947812	0.271920743768616
V4	0.169287453	0.151500515985091	0.151500515985091
V4	0	0.280515679454718	0.531644122112779
V4	0	0.0329823843232382	0.235922172887334
V4	0.55229193	0.658423332409437	1.11781946915263
V4	0	0.0780585054956589	0.24510577392168
V4	0.226257897	0.0258437244869302	0.0430438939998519
V4	0	0.33664719398042	0.881619767970281
V4	0.699332543	0.694774974322685	1.30055417996339
V4	0.896242522	0.791378659394047	1.23248355777892
V4	0	0.0213159951811309	0.0259849516430797
V4	0	0.255836493098991	0.368925305487354
V4	0.149772491	0.31192396249569	0.786119938026425
V4	0.154292139	0.00965489648105218	0.183181856834735
V4	0.542905908	0.0128112357705579	0.432221831528543
V4	1.02142193	0.621103473631501	0.80416069406089
V4	0	0.212148918180345	0.311018429829219
V4	0.409179544	0.756452823023445	1.41041699766993
V4	0.765235963	0.0305309021862698	0.434221106535768
V4	0.685932672	0.0536617011955999	0.808460591925858
V4	0.17039105	0.505476339202038	1.19845568283649
V4	0.071985915	0.545960529481191	0.860539012105458
V4	0.130458925	0.717101289993247	1.32594110431212
V4	1.189844577	0.448700719642534	0.841431336648315
V4	0.314874857	0.101013896820769	0.127261224857498
V4	0	0.00366341119335106	0.0046701282760086
V4	0	0.0492241764396631	0.0760496297812842
V4	0	0.0121140346793174	0.016882805823056
V4	0	0.480659576220825	0.645700620436672
V4	0	0.364636996957685	0.431981829557772
V4	0	0.312999012360156	0.909934282822628
V4	0.1916605	0.242839667742422	0.755225054056903
V4	0.374439368	0.110794070592068	0.421504388721786
V4	1.136860262	0.440851459822318	0.525853485126607
V4	0.247533298	0.40818443171124	0.644122394243251
