# Supplementary material for: Specialized contributions of mid-tier stages of dorsal and ventral pathways to stereoscopic processing in macaque
Source: eLife journal article supplement (doi:10.7554/elife.58749), 2021-02-24
Supplement: supp [file elife-58749-supp-v1.zip › elife_poa_e58749_Figure_7_source_data_1.csv]

Area	RefSymPhase	UsedInFig6
MT	0.178700335386924	1
MT	0.0763952965768687	1
MT	1.35652574321711	1
MT	0.172815668781217	1
MT	0.597225672199124	0
MT	0.227976743394586	1
MT	0.447634158300003	0
MT	0.928213612929835	1
MT	0.0815921578987155	1
MT	0.0452188399480034	1
MT	0.598746985155506	1
MT	1.25895708995396	1
MT	0.0799277269162983	1
MT	0.0752630278221029	1
MT	0.940727706337478	1
MT	0.0344966678254059	1
MT	0.804316564620155	0
MT	0.00140914636568156	1
MT	0.308034224614862	1
MT	1.25430254271621	0
MT	0.376192250160177	1
MT	0.883201894210388	0
MT	1.05160559680072	0
MT	0.0236590115648959	0
MT	0.0136070610093968	0
MT	1.03511432037541	1
MT	0.311574996383799	1
MT	0.0332805131600856	1
MT	0.17211525445428	1
MT	0.0232916310672306	0
MT	0.993593874106878	1
MT	0.210834836142612	1
MT	0.274928481380841	1
MT	0.55317016525376	1
MT	0.205352119001042	1
MT	0.395690161565245	1
MT	0.0564651002098384	0
MT	0.190691895579067	1
MT	0.149211514713386	1
MT	0.00929860683146675	1
MT	0.775271033511914	1
MT	0.0308735490799954	1
MT	1.00369839383952	1
MT	1.15147222903773	1
MT	0.0560546751221879	1
MT	0.238232861296067	1
MT	0.600837908390987	1
MT	1.2328112035064	1
MT	0.310547550000201	1
MT	0.140282246246155	1
MT	0.201683301039546	0
MT	0.00225434895913917	1
MT	0.429997545272296	1
MT	0.000848373390780024	1
MT	1.53463038038992	0
MT	0.0164529673096898	1
MT	0.158679710989781	0
MT	0.214951857262042	0
MT	0.283060624639528	1
MT	1.24763772266822	1
MT	0.564174215818698	1
MT	0.1987871046628	0
MT	0.148106021078062	1
MT	0.786736782484563	1
MT	0.105956208800082	1
MT	0.746908499439223	1
MT	0.1330540323404	0
MT	0.723143633161927	1
MT	0.127644614750593	1
MT	0.0244014286528074	1
MT	0.660163944501743	1
MT	0.854577167268109	1
MT	0.202377919915456	1
MT	0.14059571228192	1
MT	0.719156688447102	1
MT	1.47260514092313	0
V4	0.601312134383522	1
V4	0.0861036085909721	1
V4	0.00634667387738796	1
V4	0.504849777933229	1
V4	0.99211710768108	0
V4	0.910304239040017	1
V4	0.191496377421105	1
V4	0.00799537175509065	1
V4	0.33834963074688	1
V4	0.0607220041736714	0
V4	0.142671949355111	1
V4	0.151500514506143	1
V4	0.280515680988799	1
V4	0.260068313290586	0
V4	0.00115348995659524	0
V4	0.953731416343274	0
V4	0.010683505833738	0
V4	0.0329823847594138	1
V4	0.658423333151311	1
V4	0.0780585039306997	1
V4	0.0258437259501301	1
V4	0.336647192773882	1
V4	0.162018346761519	0
V4	0.867616556547811	0
V4	0.393302016819059	0
V4	0.694774973258901	1
V4	0.00156764591678848	0
V4	0.318405515286654	0
V4	0.791378658042119	1
V4	0.0213159940625385	1
V4	1.04536522115089	0
V4	0.255836492887992	1
V4	0.402410935610959	0
V4	0.31192396283954	1
V4	0.00965489638565458	1
V4	0.0128112343148004	1
V4	0.030869789464539	0
V4	0.621103472995184	1
V4	0.212148917356576	1
V4	0.128173785139475	0
V4	0.756452821520429	1
V4	0.0305309014513037	1
V4	0.224811363644938	0
V4	0.0536617019440938	1
V4	0.229685501963486	0
V4	1.27690915496885	0
V4	0.505476340597025	1
V4	0.545960529729531	1
V4	0.717101288706982	1
V4	0.448700718950529	1
V4	0.101013895575262	1
V4	0.709963750568584	0
V4	0.112601771772284	0
V4	0.244545540689311	0
V4	0.0408197231221644	0
V4	0.00366341163415735	1
V4	0.0623829039193605	0
V4	0.0492241751365368	1
V4	0.0121140331871959	1
V4	0.480659574998865	1
V4	0.36463699684225	1
V4	0.312999012622856	1
V4	0.242839669297024	1
V4	0.110794070509045	1
V4	0.689267850361474	0
V4	0.019470370665778	0
V4	0.440851460110349	1
V4	0.176712277862862	0
V4	0.00762352431521674	0
V4	0.408184432590169	1
V4	0.0412150644596632	0
