# Supplementary material for: Specialized contributions of mid-tier stages of dorsal and ventral pathways to stereoscopic processing in macaque
Source: eLife journal article supplement (doi:10.7554/elife.58749), 2021-02-24
Supplement: supp [file elife-58749-supp-v1.zip › elife_poa_e58749_Figure_8_source_data_1.csv]

Area	TimeFromStimOn	MeanSDDI
MT	-100	0.027486945268196
MT	-90	-0.00256978504585413
MT	-80	-0.00281211613879366
MT	-70	-0.0427374501220564
MT	-60	0.0293891239070697
MT	-50	-0.0496183280295624
MT	-40	-0.0131520220185988
MT	-30	-0.0114002328433625
MT	-20	-0.0206286587542918
MT	-10	0.0239718313165415
MT	0	-0.00888263937786047
MT	10	0.00199347019136098
MT	20	-0.00527117201630672
MT	30	0.00600692118408572
MT	40	0.00793742129734413
MT	50	-0.000830668820428416
MT	60	0.0112706575638153
MT	70	0.0458891213228685
MT	80	0.122305493992759
MT	90	0.12278078637091
MT	100	0.179063487758977
MT	110	0.184945929689072
MT	120	0.192329170206529
MT	130	0.180194170306237
MT	140	0.172379446693075
MT	150	0.190874314277032
MT	160	0.151660394776228
MT	170	0.165435682034882
MT	180	0.168447589296974
MT	190	0.196941887348341
MT	200	0.198410571616743
MT	210	0.193742988345069
MT	220	0.199325555441085
MT	230	0.188351742298993
MT	240	0.21906314793035
MT	250	0.180560440254384
MT	260	0.204571103691458
MT	270	0.200740182525126
MT	280	0.204089866362685
MT	290	0.220127210658969
MT	300	0.193976764096947
MT	310	0.199081914465887
MT	320	0.23348776561042
MT	330	0.18721336577918
MT	340	0.161915584938563
MT	350	0.163211907311537
MT	360	0.192729250017331
MT	370	0.186316808044225
MT	380	0.187893305465168
MT	390	0.165651160539437
MT	400	0.141181653013696
MT	410	0.195136625107681
MT	420	0.185689360435265
MT	430	0.161397757361692
MT	440	0.161638850915795
MT	450	0.154088892338343
MT	460	0.187131186861663
MT	470	0.180570893957623
MT	480	0.197282862410519
MT	490	0.181640316328077
MT	500	0.142892234336194
V4	-100	0.0471811903553833
V4	-90	0.0169956951513297
V4	-80	0.00155108756437232
V4	-70	0.0434696888021009
V4	-60	-0.0144258944797867
V4	-50	0.008319632111375
V4	-40	0.0108779748743205
V4	-30	-0.0275361671903261
V4	-20	0.00532157310217665
V4	-10	-0.00290307315160393
V4	0	0.0175216808795298
V4	10	0.0145533075585381
V4	20	0.0445020743552426
V4	30	0.0305250649105445
V4	40	0.0111927844065627
V4	50	0.0356029469598235
V4	60	0.0463715876419172
V4	70	-0.0561061845074943
V4	80	0.0284456894125026
V4	90	0.0207472037817056
V4	100	0.0540634649664579
V4	110	0.113814856539573
V4	120	0.123505812752047
V4	130	0.0778243073636877
V4	140	0.10398874805469
V4	150	0.134882015326229
V4	160	0.121023407598522
V4	170	0.126776286832106
V4	180	0.133603623127824
V4	190	0.147313948815064
V4	200	0.147087364462199
V4	210	0.122814717512304
V4	220	0.153145677069809
V4	230	0.106762704231527
V4	240	0.108549390809284
V4	250	0.146902634400385
V4	260	0.167180975495891
V4	270	0.102474865041167
V4	280	0.153945271825778
V4	290	0.15175728860751
V4	300	0.1261786974011
V4	310	0.141105042990648
V4	320	0.120553393895714
V4	330	0.134141543884495
V4	340	0.106890243255015
V4	350	0.125803010658955
V4	360	0.124594984207481
V4	370	0.155490280071279
V4	380	0.132276216860718
V4	390	0.152738155678187
V4	400	0.151142095048825
V4	410	0.117350336818229
V4	420	0.112943558709113
V4	430	0.127197492546613
V4	440	0.112812077157362
V4	450	0.16305813161237
V4	460	0.13292174055279
V4	470	0.145866676021102
V4	480	0.144340316088595
V4	490	0.112767522980207
V4	500	0.140474693309832
