# Supplementary material for: Specialized contributions of mid-tier stages of dorsal and ventral pathways to stereoscopic processing in macaque
Source: eLife journal article supplement (doi:10.7554/elife.58749), 2021-02-24
Supplement: supp [file elife-58749-supp-v1.zip › elife_poa_e58749_Figure_9_figure_supplement_1.pdf]

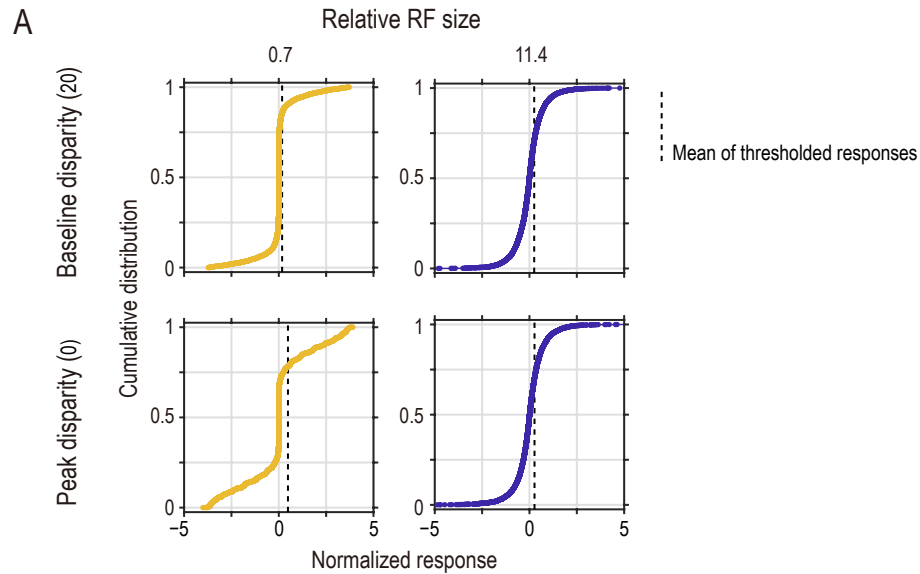

**Figure 9–figure supplement 1: Distributions of instantaneous (frame-wise) responses of the standard energy model to half-matched RDSs.** The response distribution is shown for two relative RF sizes (small and large for the left and right columns, respectively) and for two disparity values (tuning baseline and peak for the top and bottom rows, respectively). Vertical dashed lines indicate the mean computed for the half-wave rectified responses (i.e., responses of the threshold energy model). Their horizontal positions in the top-row panels correspond to the vertical levels of the arrows in the bottom-row panels of **Figure 9C**. The response distribution was sensitive to disparity when the relative RF size was small (left column), but not when the relative RF size was large (right column). At the baseline disparity (top row), the response was closer to zero when the RF was smaller.
