# Supplementary material for: Specialized contributions of mid-tier stages of dorsal and ventral pathways to stereoscopic processing in macaque
Source: eLife journal article supplement (doi:10.7554/elife.58749), 2021-02-24
Supplement: supp [file elife-58749-supp-v1.zip › elife_poa_e58749_Figure_9_figure_supplement_1_source_data_1.csv]

Response	Disparity	RelRFsize
-4.81653693840983e-06	-20	0.714285714285714
4.78733187554438e-05	-20	0.714285714285714
-0.016606120647488	-20	0.714285714285714
4.6931370703574e-05	-20	0.714285714285714
-3.61812517180231e-05	-20	0.714285714285714
0.00246136182354943	-20	0.714285714285714
2.01563152625467e-08	-20	0.714285714285714
8.53536643460814e-08	-20	0.714285714285714
0.504108207372907	-20	0.714285714285714
-0.0382076622529859	-20	0.714285714285714
-0.132470598286698	-20	0.714285714285714
0.142479565446743	-20	0.714285714285714
-0.0145692516220147	-20	0.714285714285714
1.36289822189561e-09	-20	0.714285714285714
1.03269062009785e-10	-20	0.714285714285714
3.09382026809114e-08	-20	0.714285714285714
0.00090632038452151	-20	0.714285714285714
-5.15554278591982e-14	-20	0.714285714285714
0.00152254277318373	-20	0.714285714285714
1.83044814094626	-20	0.714285714285714
-2.18107697755251	-20	0.714285714285714
0.70213323053699	-20	0.714285714285714
0.24022874502746	-20	0.714285714285714
0.0183490640489307	-20	0.714285714285714
0.435791483745114	-20	0.714285714285714
0.120346490604319	-20	0.714285714285714
-0.0492409906963425	-20	0.714285714285714
2.30194301454852	-20	0.714285714285714
0.54505072622594	-20	0.714285714285714
-1.66281924380827	-20	0.714285714285714
3.60062704193794	-20	0.714285714285714
0.000120244640179987	-20	0.714285714285714
-0.26745922411457	-20	0.714285714285714
1.77507918784733e-08	-20	0.714285714285714
-0.106647402557402	-20	0.714285714285714
-1.39747957316983	-20	0.714285714285714
0.0483082884323151	-20	0.714285714285714
1.31316599213625	-20	0.714285714285714
0.0608224161556746	-20	0.714285714285714
-3.09563996266198e-08	-20	0.714285714285714
-0.00010273420409171	-20	0.714285714285714
-0.0816711672030177	-20	0.714285714285714
-2.35285075300625e-06	-20	0.714285714285714
0.000323101003051534	-20	0.714285714285714
-0.0423156006564262	-20	0.714285714285714
-8.77380549005056e-07	-20	0.714285714285714
-0.130921171057824	-20	0.714285714285714
-0.184821617669576	-20	0.714285714285714
-4.30414712916416e-05	-20	0.714285714285714
0.0862799732293889	-20	0.714285714285714
-2.05335647341526	-20	0.714285714285714
0.00110524571078836	-20	0.714285714285714
-1.2733778219446e-07	-20	0.714285714285714
-0.186996834009886	-20	0.714285714285714
0.00416279872578219	-20	0.714285714285714
-0.0145478774522978	-20	0.714285714285714
0	-20	0.714285714285714
1.27580490837194e-11	-20	0.714285714285714
-0.259288211336995	-20	0.714285714285714
-0.000192024516533766	-20	0.714285714285714
0.793311121994627	-20	0.714285714285714
-7.72535930847953e-07	-20	0.714285714285714
-0.0085057261608544	-20	0.714285714285714
0.000361381850899373	-20	0.714285714285714
-0.00740266118375431	-20	0.714285714285714
-1.51661737199779e-06	-20	0.714285714285714
0.186343458851374	-20	0.714285714285714
-2.97168076042561e-06	-20	0.714285714285714
0.526984014469326	-20	0.714285714285714
0.0511499663283609	-20	0.714285714285714
-0.0711865983261961	-20	0.714285714285714
0.914121736975491	-20	0.714285714285714
-0.00252989704141113	-20	0.714285714285714
3.79762687516402e-05	-20	0.714285714285714
-0.696980958539081	-20	0.714285714285714
-0.0164241063533997	-20	0.714285714285714
0.211132253606328	-20	0.714285714285714
-0.238149223527455	-20	0.714285714285714
0.00691970168807276	-20	0.714285714285714
-0.000813289154970775	-20	0.714285714285714
-0.000384890761975124	-20	0.714285714285714
-0.0370624307546845	-20	0.714285714285714
-2.58224889336216e-05	-20	0.714285714285714
-2.33337201961219e-07	-20	0.714285714285714
-0.124131539701272	-20	0.714285714285714
3.33852791884887e-06	-20	0.714285714285714
-0.0118270166481052	-20	0.714285714285714
-0.0010280390521492	-20	0.714285714285714
2.24290178499737e-10	-20	0.714285714285714
-0.539418626042465	-20	0.714285714285714
0.00128068623770076	-20	0.714285714285714
0.27344363823618	-20	0.714285714285714
5.00526351734867e-05	-20	0.714285714285714
-3.5974902893195	-20	0.714285714285714
-0.00989528085002956	-20	0.714285714285714
-0.000100466768116148	-20	0.714285714285714
6.51464549215155e-05	-20	0.714285714285714
-0.26426160898925	-20	0.714285714285714
-0.00404958665004208	-20	0.714285714285714
-0.0445180156018554	-20	0.714285714285714
0.00188108297378579	-20	0.714285714285714
-3.04341302385333e-05	-20	0.714285714285714
-0.586005448147421	-20	0.714285714285714
-2.11140416159066e-06	-20	0.714285714285714
-0.0177330562184273	-20	0.714285714285714
-0.0847006044083862	-20	0.714285714285714
0.669209480337092	-20	0.714285714285714
-0.875723386283152	-20	0.714285714285714
8.87502322588668e-05	-20	0.714285714285714
-0.00508165642663364	-20	0.714285714285714
-0.0479921061504061	-20	0.714285714285714
0.647299637384737	-20	0.714285714285714
0.0674460192274397	-20	0.714285714285714
1.99773192077652	-20	0.714285714285714
-0.134570600603754	-20	0.714285714285714
-0.0656261228112275	-20	0.714285714285714
6.07860719778774e-07	-20	0.714285714285714
-1.54653202112401e-05	-20	0.714285714285714
8.45410320501027e-05	-20	0.714285714285714
-0.0129379927990091	-20	0.714285714285714
-0.356992285815688	-20	0.714285714285714
0.000257232022566873	-20	0.714285714285714
-0.226107243183655	-20	0.714285714285714
3.32949148198114e-08	-20	0.714285714285714
0.025106460361928	-20	0.714285714285714
4.3812785944165e-07	-20	0.714285714285714
0.496508503581132	-20	0.714285714285714
1.90811039869038	-20	0.714285714285714
-0.00713290277582065	-20	0.714285714285714
-0.00757275505686752	-20	0.714285714285714
-0.0015818763907928	-20	0.714285714285714
0.00239571925923366	-20	0.714285714285714
6.92911997857805e-05	-20	0.714285714285714
0.487659272340808	-20	0.714285714285714
-3.10579662418888	-20	0.714285714285714
-0.00032811926918236	-20	0.714285714285714
-0.192122683113342	-20	0.714285714285714
-1.41778663849972e-08	-20	0.714285714285714
5.83505556923608e-07	-20	0.714285714285714
1.67266615340635e-05	-20	0.714285714285714
0.273612732136313	-20	0.714285714285714
-0.000811084321169327	-20	0.714285714285714
-0.0225025152768813	-20	0.714285714285714
-2.30241274488878e-14	-20	0.714285714285714
0.064846833348034	-20	0.714285714285714
0.786980220652695	-20	0.714285714285714
0.549764181821525	-20	0.714285714285714
-2.06741375670832	-20	0.714285714285714
-0.731381292351305	-20	0.714285714285714
3.94561908017797e-10	-20	0.714285714285714
1.77605378021525	-20	0.714285714285714
3.24452006627565	-20	0.714285714285714
0.101557178631546	-20	0.714285714285714
0.251090949940669	-20	0.714285714285714
-2.62149912468302e-06	-20	0.714285714285714
0.00279275057819279	-20	0.714285714285714
-0.0797351807051479	-20	0.714285714285714
-0.00496257494528291	-20	0.714285714285714
-0.00853320584997972	-20	0.714285714285714
0.0142422196327942	-20	0.714285714285714
-0.00318445001980939	-20	0.714285714285714
7.59828281932857e-05	-20	0.714285714285714
0.0705893900696908	-20	0.714285714285714
0.00542361593910213	-20	0.714285714285714
0.000172101368796607	-20	0.714285714285714
1.55666670621375	-20	0.714285714285714
-0.391079273941513	-20	0.714285714285714
0.00326411989798779	-20	0.714285714285714
-0.000176449154366577	-20	0.714285714285714
0.0764596449957607	-20	0.714285714285714
1.84363861843123e-06	-20	0.714285714285714
0.00723380405380258	-20	0.714285714285714
-0.000109779650226237	-20	0.714285714285714
0.000319174547239403	-20	0.714285714285714
0.0555414736335624	-20	0.714285714285714
9.12274490554172e-08	-20	0.714285714285714
-0.19231378939628	-20	0.714285714285714
-1.64221526763847e-09	-20	0.714285714285714
0.130632082787414	-20	0.714285714285714
-0.0938520585411093	-20	0.714285714285714
-0.019956907854277	-20	0.714285714285714
9.60424494188154e-06	-20	0.714285714285714
-0.560438543684033	-20	0.714285714285714
-0.000175868073638532	-20	0.714285714285714
-1.19710268118215	-20	0.714285714285714
-0.000706095053460541	-20	0.714285714285714
0.0960226823930943	-20	0.714285714285714
-0.18283950886314	-20	0.714285714285714
0.0430756918161944	-20	0.714285714285714
-0.00503234711852075	-20	0.714285714285714
-7.21183152156624e-05	-20	0.714285714285714
1.76079223147882e-08	-20	0.714285714285714
-1.41004458431483	-20	0.714285714285714
0.0099531720470785	-20	0.714285714285714
-5.65247200719803e-06	-20	0.714285714285714
3.84861699681686e-07	-20	0.714285714285714
1.79823033184199e-05	-20	0.714285714285714
0.037674896615885	-20	0.714285714285714
0.756022186248256	-20	0.714285714285714
-0.128887807835035	-20	0.714285714285714
-0.184520981131626	-20	0.714285714285714
-0.997913820520157	-20	0.714285714285714
1.43555373771927	-20	0.714285714285714
-2.89548456144682	-20	0.714285714285714
-0.0851095311847567	-20	0.714285714285714
-3.34114595175745e-06	-20	0.714285714285714
-1.46677228193699e-14	-20	0.714285714285714
-3.02324755312686e-10	-20	0.714285714285714
-1.00523549429964e-10	-20	0.714285714285714
-0.0878520984379505	-20	0.714285714285714
-4.46209487470616e-05	-20	0.714285714285714
-0.401867863750121	-20	0.714285714285714
-6.77482920074462e-09	-20	0.714285714285714
0.00225012191521376	-20	0.714285714285714
0.0924454496888808	-20	0.714285714285714
0.0342713553283719	-20	0.714285714285714
0.0943694753396564	-20	0.714285714285714
-3.13179277303944e-05	-20	0.714285714285714
0.141051871005607	-20	0.714285714285714
-1.57979200893753e-07	-20	0.714285714285714
-3.42652716689565	-20	0.714285714285714
-2.36370228927114e-05	-20	0.714285714285714
-0.000774759829724219	-20	0.714285714285714
-8.8083023918005e-05	-20	0.714285714285714
0.461856228163845	-20	0.714285714285714
1.44742521075103e-05	-20	0.714285714285714
-0.210251021895203	-20	0.714285714285714
-0.000132553581772757	-20	0.714285714285714
-5.59492181245872e-07	-20	0.714285714285714
-0.321603150276569	-20	0.714285714285714
0.109697186949683	-20	0.714285714285714
0.0153770657078571	-20	0.714285714285714
-0.0152452326184409	-20	0.714285714285714
0.0916854360961591	-20	0.714285714285714
0.00040049354433281	-20	0.714285714285714
1.54978452415807e-06	-20	0.714285714285714
0.634909198561112	-20	0.714285714285714
-1.84164300603719e-05	-20	0.714285714285714
-2.00887701720379	-20	0.714285714285714
-0.233535500342084	-20	0.714285714285714
0.00203974968692102	-20	0.714285714285714
-0.167351007694709	-20	0.714285714285714
8.74674752138848e-06	-20	0.714285714285714
-0.00126392387250689	-20	0.714285714285714
0.543700470983167	-20	0.714285714285714
0.0547849390783701	-20	0.714285714285714
-3.63483771606173e-05	-20	0.714285714285714
1.89905569061481e-05	-20	0.714285714285714
-0.142295295705878	-20	0.714285714285714
3.7333519137399e-06	-20	0.714285714285714
-9.50857558056082e-09	-20	0.714285714285714
-4.03661799426152e-10	-20	0.714285714285714
-6.60382548998363e-10	-20	0.714285714285714
-0.159861066796575	-20	0.714285714285714
-0.000293218709832097	-20	0.714285714285714
3.71252902491625e-09	-20	0.714285714285714
0.0329532937141639	-20	0.714285714285714
-0.225432775817014	-20	0.714285714285714
1.04108246290211e-10	-20	0.714285714285714
-2.04538761428636	-20	0.714285714285714
-0.0312342352490227	-20	0.714285714285714
0.154445303976947	-20	0.714285714285714
0.224173340399957	-20	0.714285714285714
-0.00127367642314514	-20	0.714285714285714
-0.866488926459526	-20	0.714285714285714
1.61327558516513	-20	0.714285714285714
-2.15363732686927e-06	-20	0.714285714285714
0.232439534460136	-20	0.714285714285714
0.00562116595092491	-20	0.714285714285714
0.484307782146221	-20	0.714285714285714
0.375211840600905	-20	0.714285714285714
0.0964647735989434	-20	0.714285714285714
0.000500940698881525	-20	0.714285714285714
0.0122815092036047	-20	0.714285714285714
0.0613226192576455	-20	0.714285714285714
-1.99342032815501	-20	0.714285714285714
0.887734175743704	-20	0.714285714285714
8.35369642800759e-10	-20	0.714285714285714
4.25322230648175e-06	-20	0.714285714285714
0.116669006462002	-20	0.714285714285714
2.96662918962586e-18	-20	0.714285714285714
0.014464429110512	-20	0.714285714285714
-1.01147133605516e-05	-20	0.714285714285714
-0.000173105618457428	-20	0.714285714285714
-1.54467467130373e-07	-20	0.714285714285714
-0.00986987637571668	-20	0.714285714285714
-0.0156488083344798	-20	0.714285714285714
-0.0109775921184919	-20	0.714285714285714
-0.0646438914377655	-20	0.714285714285714
-1.33769638621907e-05	-20	0.714285714285714
0.147143262297322	-20	0.714285714285714
-0.122755373205559	-20	0.714285714285714
8.50389362260594e-05	-20	0.714285714285714
1.61419247481715e-08	-20	0.714285714285714
-0.017927951211779	-20	0.714285714285714
0.486727538984132	-20	0.714285714285714
-1.33965615701869e-08	-20	0.714285714285714
-0.0729980761400768	-20	0.714285714285714
0.117024796177934	-20	0.714285714285714
-0.0586415766594779	-20	0.714285714285714
0.949948563099455	-20	0.714285714285714
2.40417114735954	-20	0.714285714285714
0.814545455497181	-20	0.714285714285714
-0.490905286788365	-20	0.714285714285714
9.86629919063864e-08	-20	0.714285714285714
-1.76030454661062e-05	-20	0.714285714285714
0.0769384111269446	-20	0.714285714285714
2.50456547738477e-08	-20	0.714285714285714
-8.1256287932207e-07	-20	0.714285714285714
-4.06936045426423e-10	-20	0.714285714285714
2.09698704272198	-20	0.714285714285714
1.2142485410815	-20	0.714285714285714
-0.0517238074817339	-20	0.714285714285714
0.303327869263665	-20	0.714285714285714
0.0525394305493056	-20	0.714285714285714
8.34366630350014e-05	-20	0.714285714285714
0.0144897409596237	-20	0.714285714285714
-0.000137265206508262	-20	0.714285714285714
-9.78061545389488e-06	-20	0.714285714285714
5.75159174683428e-14	-20	0.714285714285714
3.38761655884024	-20	0.714285714285714
-0.127721954773972	-20	0.714285714285714
6.90547777757731e-06	-20	0.714285714285714
0.0162530266480941	-20	0.714285714285714
1.86434059972846e-07	-20	0.714285714285714
0.00250375324287774	-20	0.714285714285714
-0.179671546833709	-20	0.714285714285714
2.28655445052858	-20	0.714285714285714
-1.18956204737904e-11	-20	0.714285714285714
0.00022777789885992	-20	0.714285714285714
0.000696901630493199	-20	0.714285714285714
0.0181203116846367	-20	0.714285714285714
-0.00661340231766375	-20	0.714285714285714
-3.49785982790102	-20	0.714285714285714
-0.162015885976015	-20	0.714285714285714
0.391454387514985	-20	0.714285714285714
0.0108830951815405	-20	0.714285714285714
-0.000951629515745975	-20	0.714285714285714
-7.13099716599036e-07	-20	0.714285714285714
0.014424725090149	-20	0.714285714285714
6.36568215823857e-05	-20	0.714285714285714
-0.0233956646453706	-20	0.714285714285714
0.790373840353863	-20	0.714285714285714
-2.33583823972923e-06	-20	0.714285714285714
-0.780846617440465	-20	0.714285714285714
0.0234488292037655	-20	0.714285714285714
-1.8750598809799e-06	-20	0.714285714285714
0.897974633154552	-20	0.714285714285714
-0.0049027862847925	-20	0.714285714285714
0.119704114393231	-20	0.714285714285714
2.78357345680178e-07	-20	0.714285714285714
-0.336674454662151	-20	0.714285714285714
0.00380418718032021	-20	0.714285714285714
0.000479497869687285	-20	0.714285714285714
-9.69095249594457e-06	-20	0.714285714285714
-1.03286990031758e-14	-20	0.714285714285714
0.00375136820084668	-20	0.714285714285714
-1.20079388573481	-20	0.714285714285714
0.0496806688970367	-20	0.714285714285714
-3.62001421163766e-05	-20	0.714285714285714
0.35529756533197	-20	0.714285714285714
0.0780908065343993	-20	0.714285714285714
-0.651767184085527	-20	0.714285714285714
-1.12327649625949e-05	-20	0.714285714285714
2.88870394242723	-20	0.714285714285714
-0.00345519321826708	-20	0.714285714285714
0.238985357929032	-20	0.714285714285714
-0.00428292142984523	-20	0.714285714285714
8.05471393090784e-06	-20	0.714285714285714
-0.143359918466603	-20	0.714285714285714
-0.0354881641529886	-20	0.714285714285714
5.81974664380995e-09	-20	0.714285714285714
-0.736074006996659	-20	0.714285714285714
0.106723076562848	-20	0.714285714285714
0.112713478348968	-20	0.714285714285714
-0.50106867392162	-20	0.714285714285714
-0.462278796795228	-20	0.714285714285714
1.59397041480915e-15	-20	0.714285714285714
-0.248276548391506	-20	0.714285714285714
-0.000771995208714205	-20	0.714285714285714
2.01389132994112	-20	0.714285714285714
0.26317897440025	-20	0.714285714285714
-0.244950027418665	-20	0.714285714285714
-0.0093436742564963	-20	0.714285714285714
4.0137699385621e-12	-20	0.714285714285714
-3.40695615719656	-20	0.714285714285714
0.0152593645365986	-20	0.714285714285714
0.166249550148587	-20	0.714285714285714
-0.00476266895904112	-20	0.714285714285714
-0.0120570989146593	-20	0.714285714285714
0.000620761631897708	-20	0.714285714285714
0.0100461945717442	-20	0.714285714285714
0.556165314784133	-20	0.714285714285714
3.94320906494563e-06	-20	0.714285714285714
1.6768718297477	-20	0.714285714285714
-0.0351510580355161	-20	0.714285714285714
0.375925323112163	-20	0.714285714285714
-0.132559377112555	-20	0.714285714285714
0.00696386532228461	-20	0.714285714285714
0.00509904522157393	-20	0.714285714285714
0.293268581286384	-20	0.714285714285714
-0.000551401231997902	-20	0.714285714285714
-0.275008406972706	-20	0.714285714285714
-0.0242763191001194	-20	0.714285714285714
-8.33201193403762e-05	-20	0.714285714285714
-0.10449774832768	-20	0.714285714285714
-4.40103604061176e-05	-20	0.714285714285714
-0.00511096507851923	-20	0.714285714285714
-0.00138370880839326	-20	0.714285714285714
0.0487909346821046	-20	0.714285714285714
1.32348930614811	-20	0.714285714285714
0.000264089103889398	-20	0.714285714285714
2.92877949921402	-20	0.714285714285714
3.54009822931008	-20	0.714285714285714
-0.0115640109235191	-20	0.714285714285714
-0.0848646364893677	-20	0.714285714285714
-0.177167480251144	-20	0.714285714285714
-3.64125050484215e-07	-20	0.714285714285714
0.00429156807167773	-20	0.714285714285714
-2.19977146339235	-20	0.714285714285714
-1.39097529826216e-10	-20	0.714285714285714
-1.49976662769112e-09	-20	0.714285714285714
-2.48629925337956e-07	-20	0.714285714285714
5.57124440808965e-05	-20	0.714285714285714
1.33886946003421e-08	-20	0.714285714285714
0.446542751322829	-20	0.714285714285714
0.0860433462215115	-20	0.714285714285714
-0.0426580276631856	-20	0.714285714285714
2.75568488446946	-20	0.714285714285714
-0.000386118550786965	-20	0.714285714285714
3.91612061079955e-05	-20	0.714285714285714
0.0353239378282145	-20	0.714285714285714
0.0133030440088238	-20	0.714285714285714
1.20865532817611	-20	0.714285714285714
-9.12509869627105e-07	-20	0.714285714285714
1.78244026529408e-06	-20	0.714285714285714
2.27300650542548e-05	-20	0.714285714285714
-2.92667096129025e-06	-20	0.714285714285714
-2.0530284194413e-08	-20	0.714285714285714
-0.0141433770399618	-20	0.714285714285714
1.3039659214215e-07	-20	0.714285714285714
-0.0253022967240063	-20	0.714285714285714
-0.0663413633277361	-20	0.714285714285714
-2.26502561696379e-14	-20	0.714285714285714
-0.00760487985791819	-20	0.714285714285714
-0.611492962170767	-20	0.714285714285714
0.000122217663884877	-20	0.714285714285714
1.39864469490481e-05	-20	0.714285714285714
-2.98885646186421e-06	-20	0.714285714285714
0.00130584731559154	-20	0.714285714285714
-0.563323504328488	-20	0.714285714285714
0.000553125456214229	-20	0.714285714285714
3.5618348659145e-06	-20	0.714285714285714
-1.77120708001601	-20	0.714285714285714
1.12968287249632e-11	-20	0.714285714285714
0.00776991575867799	-20	0.714285714285714
-0.00617011806465445	-20	0.714285714285714
-1.15528768787208e-10	-20	0.714285714285714
-5.85330466280241e-05	-20	0.714285714285714
0.142417097284947	-20	0.714285714285714
2.24527006056001e-09	-20	0.714285714285714
-1.3212963844709e-06	-20	0.714285714285714
-0.0479836870156954	-20	0.714285714285714
8.99940457183294e-07	-20	0.714285714285714
0.00632985861502009	-20	0.714285714285714
-1.11354913197281	-20	0.714285714285714
0.00109378534249792	-20	0.714285714285714
1.34487550910674	-20	0.714285714285714
-0.000639803760744432	-20	0.714285714285714
-0.00209337575799924	-20	0.714285714285714
-0.00726117131676405	-20	0.714285714285714
1.36936725514565e-05	-20	0.714285714285714
-0.000118273849129583	-20	0.714285714285714
-7.58005148935207e-05	-20	0.714285714285714
-0.624894041082071	-20	0.714285714285714
0.000366347596604336	-20	0.714285714285714
1.07175138283434e-09	-20	0.714285714285714
0.00443634846268336	-20	0.714285714285714
-0.200992208792528	-20	0.714285714285714
-0.151456436930059	-20	0.714285714285714
1.04002452282198	-20	0.714285714285714
-0.0519964995015676	-20	0.714285714285714
-1.50803304998716e-05	-20	0.714285714285714
-0.137495803500844	-20	0.714285714285714
-1.02209809061686	-20	0.714285714285714
-0.00162172208448903	-20	0.714285714285714
-0.00324392754643856	-20	0.714285714285714
5.90049085581342e-06	-20	0.714285714285714
1.35728356981252e-05	-20	0.714285714285714
2.74330761702508	-20	0.714285714285714
-1.14762497910249	-20	0.714285714285714
-0.0434388593774008	-20	0.714285714285714
0.0697085977113379	-20	0.714285714285714
-3.20838093711427e-10	-20	0.714285714285714
-0.000164601375672045	-20	0.714285714285714
-2.15608181341849e-09	-20	0.714285714285714
1.32442678724539e-06	-20	0.714285714285714
-2.25114193371426	-20	0.714285714285714
-3.15107357012204	-20	0.714285714285714
-1.5294138344736e-05	-20	0.714285714285714
-2.39380526487544	-20	0.714285714285714
-0.0199415053435026	-20	0.714285714285714
5.12285843787438e-06	-20	0.714285714285714
0.0576867747866047	-20	0.714285714285714
0.242314140138274	-20	0.714285714285714
0.00790003549210873	-20	0.714285714285714
-0.000248487929416559	-20	0.714285714285714
-0.0116471177017117	-20	0.714285714285714
9.19939997552963e-06	-20	0.714285714285714
-0.00468152735320565	-20	0.714285714285714
-0.0497469716307888	-20	0.714285714285714
-0.00066104711978158	-20	0.714285714285714
-0.001196028619976	-20	0.714285714285714
1.57418474780832e-05	-20	0.714285714285714
0.0852923603276693	-20	0.714285714285714
-0.0639392663235569	-20	0.714285714285714
-0.00115982464741557	-20	0.714285714285714
0.145733114728272	-20	0.714285714285714
6.14374456817573e-05	-20	0.714285714285714
-0.000501477172801353	-20	0.714285714285714
4.28703548346656e-06	-20	0.714285714285714
-0.404019774792255	-20	0.714285714285714
0.03414799050745	-20	0.714285714285714
-0.271500300645735	-20	0.714285714285714
-0.552565957941712	-20	0.714285714285714
-1.36376998844828e-08	-20	0.714285714285714
-2.61484949978391e-11	-20	0.714285714285714
0.0128975490803361	-20	0.714285714285714
0.000289036602291895	-20	0.714285714285714
0.491817310967414	-20	0.714285714285714
0.0879545197534348	-20	0.714285714285714
1.31106579977918e-08	-20	0.714285714285714
-0.00576941761215222	-20	0.714285714285714
0.447195073411388	-20	0.714285714285714
-0.0173929436158787	-20	0.714285714285714
2.35921920305516	-20	0.714285714285714
0.0122584949371918	-20	0.714285714285714
-0.117921958469346	-20	0.714285714285714
0.00153370677426539	-20	0.714285714285714
-0.138900281795015	-20	0.714285714285714
0.00219103506530251	-20	0.714285714285714
0.0767020799732962	-20	0.714285714285714
-5.6697673495526e-05	-20	0.714285714285714
-0.0905877820745893	-20	0.714285714285714
-0.0251208140252847	-20	0.714285714285714
-0.00756389250561066	-20	0.714285714285714
-0.103061567602478	-20	0.714285714285714
1.31783044712948e-14	-20	0.714285714285714
0.00510083272540512	-20	0.714285714285714
3.20826582573953	-20	0.714285714285714
-0.113899759599992	-20	0.714285714285714
-0.0002804330411531	-20	0.714285714285714
-0.127697079592664	-20	0.714285714285714
-0.387064627499657	-20	0.714285714285714
-1.99071715954732	-20	0.714285714285714
-3.72111209428481	-20	0.714285714285714
-0.313487110998767	-20	0.714285714285714
-0.0108012784580641	-20	0.714285714285714
1.03497955662693e-05	-20	0.714285714285714
-0.0091263887046399	-20	0.714285714285714
0.524930025733973	-20	0.714285714285714
-3.38539970065006e-06	-20	0.714285714285714
0.000821233262570762	-20	0.714285714285714
-0.00466107021514367	-20	0.714285714285714
0.140505659705813	-20	0.714285714285714
1.68329158551434e-09	-20	0.714285714285714
-0.000905848762209213	-20	0.714285714285714
-0.465652278857718	-20	0.714285714285714
-0.209781093804366	-20	0.714285714285714
0.164924352512632	-20	0.714285714285714
-0.552576264643481	-20	0.714285714285714
-3.00003008538096e-05	-20	0.714285714285714
9.20770688622472e-08	-20	0.714285714285714
-2.86920739168689e-05	-20	0.714285714285714
1.50930652495877	-20	0.714285714285714
0.000298980185095064	-20	0.714285714285714
3.44490990983935e-09	-20	0.714285714285714
1.60297290849339	-20	0.714285714285714
-2.48019277424854e-05	-20	0.714285714285714
-0.313448753310192	-20	0.714285714285714
0.0707425355249163	-20	0.714285714285714
3.50981359951919e-14	-20	0.714285714285714
2.59425800518713e-07	-20	0.714285714285714
0.0719425608304247	-20	0.714285714285714
0.0258704515379881	-20	0.714285714285714
-0.0176142297834825	-20	0.714285714285714
-1.78727134372002e-06	-20	0.714285714285714
0.00745725830528989	-20	0.714285714285714
2.78394831181355e-08	-20	0.714285714285714
-0.0064778195979482	-20	0.714285714285714
0.917126376123906	-20	0.714285714285714
-0.00795198961008886	-20	0.714285714285714
0.0291067033572079	-20	0.714285714285714
9.46177523966141e-05	-20	0.714285714285714
2.19030596219322e-05	-20	0.714285714285714
-0.00144444808622023	-20	0.714285714285714
0.197251434951635	-20	0.714285714285714
-0.000276022845751557	-20	0.714285714285714
0.015017729577494	-20	0.714285714285714
2.57806714900291	-20	0.714285714285714
0.0771136262101203	-20	0.714285714285714
-0.00340220416343808	-20	0.714285714285714
0.00559212259530893	-20	0.714285714285714
-1.72485611874277e-06	-20	0.714285714285714
0.0247475302234876	-20	0.714285714285714
1.85178587995043	-20	0.714285714285714
-0.00038628491526171	-20	0.714285714285714
0.504959121465062	-20	0.714285714285714
-1.00076269609077e-05	-20	0.714285714285714
-0.0093304272102116	-20	0.714285714285714
0.0495572735740776	-20	0.714285714285714
-0.000683408561839072	-20	0.714285714285714
-0.00421218703630642	-20	0.714285714285714
-0.00152708756110927	-20	0.714285714285714
-0.000881543508154999	-20	0.714285714285714
-0.791800197944208	-20	0.714285714285714
-0.0114224891832184	-20	0.714285714285714
0.0934145801475713	-20	0.714285714285714
0.00251683871289783	-20	0.714285714285714
-2.53058639711136	-20	0.714285714285714
0.109887754213884	-20	0.714285714285714
0.479635247343996	-20	0.714285714285714
0.00012609714545587	-20	0.714285714285714
-3.59498055913196e-06	-20	0.714285714285714
0.285867532659453	-20	0.714285714285714
-1.82134086067277e-05	-20	0.714285714285714
1.33881352999581	-20	0.714285714285714
-0.281370585737576	-20	0.714285714285714
-0.000372247771312625	-20	0.714285714285714
-0.0309591453553733	-20	0.714285714285714
-0.114899560649218	-20	0.714285714285714
-1.0723387894767e-14	-20	0.714285714285714
-0.830190994509011	-20	0.714285714285714
2.18681584624622	-20	0.714285714285714
-0.00291540564062358	-20	0.714285714285714
1.4443046276775	-20	0.714285714285714
0.310779149245433	-20	0.714285714285714
1.57332861784207e-07	-20	0.714285714285714
0.251880324460231	-20	0.714285714285714
-0.101751327767148	-20	0.714285714285714
0.0361562032279049	-20	0.714285714285714
0.670523530572528	-20	0.714285714285714
0.70126724403578	-20	0.714285714285714
-0.00602660891655672	-20	0.714285714285714
1.23869854238475e-08	-20	0.714285714285714
0.0847993241351357	-20	0.714285714285714
-0.779931344615589	-20	0.714285714285714
-3.28654858732923e-05	-20	0.714285714285714
2.32675983552613	-20	0.714285714285714
0.0647730623064529	-20	0.714285714285714
-0.0427001914965546	-20	0.714285714285714
-0.000300062206385953	-20	0.714285714285714
-9.28422961462955e-07	-20	0.714285714285714
1.31068953817831	-20	0.714285714285714
-1.31743012626775e-09	-20	0.714285714285714
0.0252016352797606	-20	0.714285714285714
-0.00244284558698214	-20	0.714285714285714
0.0337391906199227	-20	0.714285714285714
-3.3566118760156	-20	0.714285714285714
5.73966408476131e-09	-20	0.714285714285714
-0.116297719299127	-20	0.714285714285714
-0.0575305133622349	-20	0.714285714285714
0.0142274628651415	-20	0.714285714285714
0.0554873835092619	-20	0.714285714285714
6.29011231365763e-07	-20	0.714285714285714
-9.84954547070295e-05	-20	0.714285714285714
0.000196146208977027	-20	0.714285714285714
0.0114159970723579	-20	0.714285714285714
1.64854566869475	-20	0.714285714285714
-0.0100014446111627	-20	0.714285714285714
0.000803147078580639	-20	0.714285714285714
2.42002613762423	-20	0.714285714285714
-0.00977378989870223	-20	0.714285714285714
0.0959522631042901	-20	0.714285714285714
-8.89535243659905e-11	-20	0.714285714285714
-0.00419562612689656	-20	0.714285714285714
-0.0134505358697106	-20	0.714285714285714
-1.01579581921477	-20	0.714285714285714
0.127888311525095	-20	0.714285714285714
0.00191119362110531	-20	0.714285714285714
1.03539858673187e-05	-20	0.714285714285714
8.89974153261e-16	-20	0.714285714285714
0.219302883324752	-20	0.714285714285714
0.0459155844770813	-20	0.714285714285714
-0.00867016090495903	-20	0.714285714285714
0.0882169552718226	-20	0.714285714285714
2.57303862257416	-20	0.714285714285714
0.00669379202022126	-20	0.714285714285714
0.000797774008249012	-20	0.714285714285714
0.0130860233773771	-20	0.714285714285714
0.00689754499384299	-20	0.714285714285714
-0.00703115602727359	-20	0.714285714285714
1.61019100816941	-20	0.714285714285714
0.235228979633701	-20	0.714285714285714
0.468392884190962	-20	0.714285714285714
-6.19472139257548e-07	-20	0.714285714285714
-0.00193477949208476	-20	0.714285714285714
-0.172638931621591	-20	0.714285714285714
4.02751181876877e-05	-20	0.714285714285714
0.0871257914077929	-20	0.714285714285714
2.16420996790641e-06	-20	0.714285714285714
-0.0818727167756255	-20	0.714285714285714
-0.00701085166102373	-20	0.714285714285714
0.00483213494719154	-20	0.714285714285714
-0.177090247062429	-20	0.714285714285714
0.0111788565027785	-20	0.714285714285714
-0.0927487726963589	-20	0.714285714285714
8.52821937382264e-05	-20	0.714285714285714
0.793645127167321	-20	0.714285714285714
-0.927392483141323	-20	0.714285714285714
-6.85505110123659e-05	-20	0.714285714285714
1.26810937196039e-05	-20	0.714285714285714
0.0921320751347709	-20	0.714285714285714
4.34691372663118e-05	-20	0.714285714285714
-9.95898710064935e-06	-20	0.714285714285714
-1.16835315088287	-20	0.714285714285714
0.960121726383772	-20	0.714285714285714
3.30434729569615	-20	0.714285714285714
-3.24716910055328	-20	0.714285714285714
-2.68382748174357	-20	0.714285714285714
-0.00746300116427687	-20	0.714285714285714
-1.1578921030516	-20	0.714285714285714
-0.0359008716698992	-20	0.714285714285714
3.17032113270685e-08	-20	0.714285714285714
0.000396903328192714	-20	0.714285714285714
0.0160332793393045	-20	0.714285714285714
1.14602949968221e-07	-20	0.714285714285714
-0.015431566254516	-20	0.714285714285714
0.370240511321024	-20	0.714285714285714
-1.55163341326018	-20	0.714285714285714
-0.387909561887875	-20	0.714285714285714
-6.98756309654035e-11	-20	0.714285714285714
0.0436400273458061	-20	0.714285714285714
0.163067143883901	-20	0.714285714285714
-0.0562635368650463	-20	0.714285714285714
-2.03239552665914	-20	0.714285714285714
-0.120178922561361	-20	0.714285714285714
-0.0419183050794067	-20	0.714285714285714
0.284173355137634	-20	0.714285714285714
1.43613882199197	-20	0.714285714285714
0.95964188647112	-20	0.714285714285714
4.42769331259972e-05	-20	0.714285714285714
0	-20	0.714285714285714
-0.739750151682845	-20	0.714285714285714
0.0138523191849323	-20	0.714285714285714
0.0236002873445722	-20	0.714285714285714
-0.796668149473734	-20	0.714285714285714
-1.2083705992171	-20	0.714285714285714
-2.6499768909623	-20	0.714285714285714
2.38144830418355	-20	0.714285714285714
-0.142978333285398	-20	0.714285714285714
-3.4985067722933e-05	-20	0.714285714285714
3.02903584065678	-20	0.714285714285714
-1.18017088527706	-20	0.714285714285714
0.402235260277414	-20	0.714285714285714
-1.70080422032829	-20	0.714285714285714
0.0101625129925186	-20	0.714285714285714
-4.50453566377986e-08	-20	0.714285714285714
0.556906526269135	-20	0.714285714285714
-0.00272734694953702	-20	0.714285714285714
-0.0703047797363372	-20	0.714285714285714
-0.14959908630402	-20	0.714285714285714
-3.53439247517189	-20	0.714285714285714
5.84018607579504e-05	-20	0.714285714285714
-0.125127266574131	-20	0.714285714285714
-1.17291902689364	-20	0.714285714285714
-0.0213905070452374	-20	0.714285714285714
-2.21704751618967e-10	-20	0.714285714285714
-7.0439483454727e-05	-20	0.714285714285714
0.0210705902016591	-20	0.714285714285714
0.0038105698961635	-20	0.714285714285714
0.000723187949910208	-20	0.714285714285714
0.00157630317051929	-20	0.714285714285714
-0.0740631497020336	-20	0.714285714285714
-1.14566412674152	-20	0.714285714285714
0.00110566481051484	-20	0.714285714285714
0.877192806263442	-20	0.714285714285714
-0.00123802205437803	-20	0.714285714285714
-0.000958994148133556	-20	0.714285714285714
-0.0003438510693936	-20	0.714285714285714
0.00210665752979655	-20	0.714285714285714
0.0588698686569057	-20	0.714285714285714
0.00867708810974114	-20	0.714285714285714
-1.07202049621535	-20	0.714285714285714
0.144155958671728	-20	0.714285714285714
0.85298027364301	-20	0.714285714285714
6.47926104536016e-05	-20	0.714285714285714
0.0996241007176254	-20	0.714285714285714
0.770649645453504	-20	0.714285714285714
-7.73384566901499e-05	-20	0.714285714285714
0.734824675480138	-20	0.714285714285714
-0.203197239391933	-20	0.714285714285714
-0.0288581835409033	-20	0.714285714285714
0.033053660267535	-20	0.714285714285714
0.147092893033534	-20	0.714285714285714
-3.28112879198413	-20	0.714285714285714
0.0234691804496605	-20	0.714285714285714
0.150822415345688	-20	0.714285714285714
0.0287150355293361	-20	0.714285714285714
-0.00645297117226214	-20	0.714285714285714
0.00037660065518747	-20	0.714285714285714
-3.01490526155627e-11	-20	0.714285714285714
0.0703230766369042	-20	0.714285714285714
3.7505035229899e-05	-20	0.714285714285714
-3.15494450497991e-06	-20	0.714285714285714
-6.11107737936794e-05	-20	0.714285714285714
9.54601612108331e-06	-20	0.714285714285714
-0.00689421653607724	-20	0.714285714285714
-2.06987766592101	-20	0.714285714285714
-9.55546969844165e-07	-20	0.714285714285714
-0.00137416940413365	-20	0.714285714285714
-0.000194320060368782	-20	0.714285714285714
-4.39357688233976e-10	-20	0.714285714285714
0.000193309340165535	-20	0.714285714285714
-0.039775956657678	-20	0.714285714285714
-0.56593793160782	-20	0.714285714285714
-0.0260005750614037	-20	0.714285714285714
1.12612708928221e-06	-20	0.714285714285714
-9.26202763595611e-08	-20	0.714285714285714
2.56244826130719e-07	-20	0.714285714285714
-0.00137385620585426	-20	0.714285714285714
-0.246608322681547	-20	0.714285714285714
8.52504962204628e-06	-20	0.714285714285714
-0.0188309569194274	-20	0.714285714285714
-1.92020976405422	-20	0.714285714285714
6.00124668664048e-06	-20	0.714285714285714
0.00291703830483565	-20	0.714285714285714
-2.46961616856463	-20	0.714285714285714
-0	-20	0.714285714285714
4.79490287669936e-05	-20	0.714285714285714
-9.46223693461257e-06	-20	0.714285714285714
0.00288906789225113	-20	0.714285714285714
-0.000794636097760027	-20	0.714285714285714
-9.36863004930413e-06	-20	0.714285714285714
0.227723969736104	-20	0.714285714285714
0.0200006749106955	-20	0.714285714285714
0.487821232965891	-20	0.714285714285714
0.00902747949861445	-20	0.714285714285714
-2.56201043357656e-08	-20	0.714285714285714
-0.00169270223932139	-20	0.714285714285714
0.000896415025451857	-20	0.714285714285714
0.225639817304117	-20	0.714285714285714
-0.0600449991262852	-20	0.714285714285714
0.00518031855176932	-20	0.714285714285714
-2.87797338970279e-08	-20	0.714285714285714
6.71181513058018e-05	-20	0.714285714285714
-0.00725980802492745	-20	0.714285714285714
0.0877562886184171	-20	0.714285714285714
0.000150585197107233	-20	0.714285714285714
-0.657160129164126	-20	0.714285714285714
0.0415406100120143	-20	0.714285714285714
1.09473343308845e-08	-20	0.714285714285714
-0.0219399356912189	-20	0.714285714285714
-0.423117331726824	-20	0.714285714285714
-0.400359508630178	-20	0.714285714285714
0.293782331357479	-20	0.714285714285714
-0.382428311490122	-20	0.714285714285714
-0.821544163212774	-20	0.714285714285714
-1.69204757446217e-05	-20	0.714285714285714
-3.85677080530955e-07	-20	0.714285714285714
-0.000191458034648101	-20	0.714285714285714
-0.968516024167795	-20	0.714285714285714
0.0330460894570862	-20	0.714285714285714
0.0076749456915042	-20	0.714285714285714
2.55546198660005	-20	0.714285714285714
-6.70718510310329e-06	-20	0.714285714285714
-0.672897903621554	-20	0.714285714285714
2.05777844238129	-20	0.714285714285714
2.27788912848932	-20	0.714285714285714
0.0952429918698677	-20	0.714285714285714
0.0366101680486803	-20	0.714285714285714
1.22197093991545	-20	0.714285714285714
-2.08296431228168	-20	0.714285714285714
-0.237946323641343	-20	0.714285714285714
1.58543913067678e-12	-20	0.714285714285714
-0.325160349674363	-20	0.714285714285714
-2.84849073665817e-06	-20	0.714285714285714
0.00194835360745808	-20	0.714285714285714
-0.00485304802895243	-20	0.714285714285714
0.0216966647825604	-20	0.714285714285714
-1.97949825923953e-11	-20	0.714285714285714
-0.15309367452146	-20	0.714285714285714
-9.719052106773e-08	-20	0.714285714285714
-0.0016210673672314	-20	0.714285714285714
-0.00145112629389806	-20	0.714285714285714
-1.12439515336348	-20	0.714285714285714
0.0344926225789404	-20	0.714285714285714
-0.00247247799642003	-20	0.714285714285714
8.91095845716237e-10	-20	0.714285714285714
-0.0874520174290149	-20	0.714285714285714
-0.145790406574358	-20	0.714285714285714
-1.98030764185065	-20	0.714285714285714
-0.0856613197620589	-20	0.714285714285714
0.130365638796	-20	0.714285714285714
0.0960763093242325	-20	0.714285714285714
4.28771325451612e-05	-20	0.714285714285714
-0.016994653463532	-20	0.714285714285714
-5.96424687701099e-08	-20	0.714285714285714
1.55714828116917	-20	0.714285714285714
1.26879171992368	-20	0.714285714285714
-1.60310188081349	-20	0.714285714285714
0.0206432592461134	-20	0.714285714285714
1.40140763836266e-05	-20	0.714285714285714
-0.16196260613578	-20	0.714285714285714
1.46504850199314	-20	0.714285714285714
3.05869452654158e-07	-20	0.714285714285714
0.0579671461007445	-20	0.714285714285714
0.128929859522922	-20	0.714285714285714
-5.58248185123202e-07	-20	0.714285714285714
-3.77297951982378e-08	-20	0.714285714285714
0.449930348811599	-20	0.714285714285714
-0.00886024263776574	-20	0.714285714285714
-2.74136919789954e-05	-20	0.714285714285714
-6.79969858449472e-05	-20	0.714285714285714
1.84709508767608	-20	0.714285714285714
0.00330363524107319	-20	0.714285714285714
-0.00337076351361629	-20	0.714285714285714
-1.81650652384682	-20	0.714285714285714
0.0348148881984994	-20	0.714285714285714
0.0456394396750454	-20	0.714285714285714
-5.03893651986973e-08	-20	0.714285714285714
-0.111273446407672	-20	0.714285714285714
8.7209136103459e-09	-20	0.714285714285714
0.649540491613007	-20	0.714285714285714
0.0009428586844748	-20	0.714285714285714
0.000679320119472785	-20	0.714285714285714
8.89368851067764e-06	-20	0.714285714285714
-0.155481263861446	-20	0.714285714285714
0.0156061361659651	-20	0.714285714285714
7.07777872152367e-06	-20	0.714285714285714
-1.09156486987436	-20	0.714285714285714
1.55393544498578	-20	0.714285714285714
0.0380412037184734	-20	0.714285714285714
3.56392257981751	-20	0.714285714285714
-4.29463549315215e-06	-20	0.714285714285714
0.0283013420626062	-20	0.714285714285714
-0.0397008065013014	-20	0.714285714285714
0.00022035046558463	-20	0.714285714285714
-0.000130171731268001	-20	0.714285714285714
0.00259482715456268	-20	0.714285714285714
-3.26033870081857e-07	-20	0.714285714285714
0.0128899901125836	-20	0.714285714285714
-0.00298978509754902	-20	0.714285714285714
-2.02440468240141e-09	-20	0.714285714285714
-3.21661627837178e-08	-20	0.714285714285714
-1.04823106229745	-20	0.714285714285714
0.000582470880885808	-20	0.714285714285714
-0.256217649103153	-20	0.714285714285714
-3.56855041718767	-20	0.714285714285714
1.21456914803151e-07	-20	0.714285714285714
2.4622258460833e-05	-20	0.714285714285714
-0.0291734454591416	-20	0.714285714285714
0.0197164138804546	-20	0.714285714285714
-0.0073966085084643	-20	0.714285714285714
-0.109258571103914	-20	0.714285714285714
2.27473785728022e-05	-20	0.714285714285714
0.00598226740830107	-20	0.714285714285714
-1.08353629545341	-20	0.714285714285714
0.0164742117110226	-20	0.714285714285714
-1.18450765983087	-20	0.714285714285714
1.38167953610896e-09	-20	0.714285714285714
-2.27472272692234e-07	-20	0.714285714285714
1.24037995276824	-20	0.714285714285714
-0.000286938638278355	-20	0.714285714285714
-0.00116297469627738	-20	0.714285714285714
-0.00197196766052591	-20	0.714285714285714
-0.452255998781676	-20	0.714285714285714
-0.0269019015692046	-20	0.714285714285714
-0.000140501010804914	-20	0.714285714285714
-0.00432572992287634	-20	0.714285714285714
-0.000304972413759658	-20	0.714285714285714
0.0757496729277354	-20	0.714285714285714
1.81534702174544	-20	0.714285714285714
9.75891775331724e-05	-20	0.714285714285714
-2.63194729283805e-05	-20	0.714285714285714
-0.339294364961321	-20	0.714285714285714
0.00376664740882775	-20	0.714285714285714
1.39197476293289	-20	0.714285714285714
-9.64787483381363e-08	-20	0.714285714285714
-0.083730703735494	-20	0.714285714285714
-3.20237507418555	-20	0.714285714285714
1.46642664331339e-06	-20	0.714285714285714
-0.000459079560588882	-20	0.714285714285714
1.04902586060407e-05	-20	0.714285714285714
-2.38894506049177	-20	0.714285714285714
-0.171969015527333	-20	0.714285714285714
0.00334452660528149	-20	0.714285714285714
-0.0222306860120392	-20	0.714285714285714
-1.61871199668799	-20	0.714285714285714
0.00714034618090572	-20	0.714285714285714
-1.06070812922215e-05	-20	0.714285714285714
1.32726249439458e-06	-20	0.714285714285714
3.02916916468473	-20	0.714285714285714
0.00107374840946223	-20	0.714285714285714
-1.42617281525484	-20	0.714285714285714
-0.0959047133297868	-20	0.714285714285714
-0.062596332141805	-20	0.714285714285714
-0.0465047737102837	-20	0.714285714285714
-1.45334337749341	-20	0.714285714285714
0.0194818735569955	-20	0.714285714285714
0.00310940676202887	-20	0.714285714285714
0.0715644325230446	-20	0.714285714285714
-2.31383611328972	-20	0.714285714285714
6.27977754445809e-07	-20	0.714285714285714
-4.31984497029734e-07	-20	0.714285714285714
-0.162813957751863	-20	0.714285714285714
0.591104082978114	-20	0.714285714285714
-0.00350389432150633	-20	0.714285714285714
8.47795576110502e-06	-20	0.714285714285714
-0.277262370486859	-20	0.714285714285714
0.067933330882931	-20	0.714285714285714
0.240472201300749	-20	0.714285714285714
0.0347753832450138	-20	0.714285714285714
-0.000328785364293977	-20	0.714285714285714
-4.41196495609212e-05	-20	0.714285714285714
6.31269659772649e-09	-20	0.714285714285714
0.00040368596680173	-20	0.714285714285714
-0.717863387888865	-20	0.714285714285714
-1.21004878562112e-14	-20	0.714285714285714
0.000164597572467561	-20	0.714285714285714
0.0894676958085666	-20	0.714285714285714
0.00281139234328158	-20	0.714285714285714
2.54574081939556	-20	0.714285714285714
-2.10715764601481e-10	-20	0.714285714285714
0.325315248337741	-20	0.714285714285714
3.96659071318571e-09	-20	0.714285714285714
-2.89828089169543e-05	-20	0.714285714285714
-0.375537230528636	-20	0.714285714285714
-2.21539002455231	-20	0.714285714285714
-2.59381775928054	-20	0.714285714285714
-0.0509729794969962	-20	0.714285714285714
-0.00754406400760008	-20	0.714285714285714
-0.00132784362219447	-20	0.714285714285714
-3.52488355916089e-10	-20	0.714285714285714
0.000843558221186403	-20	0.714285714285714
-0.000227249312509723	-20	0.714285714285714
0.170086922752291	-20	0.714285714285714
1.94558357402547e-06	-20	0.714285714285714
-0.0207460352015937	-20	0.714285714285714
0.0461478509091565	-20	0.714285714285714
0.000258525650960092	-20	0.714285714285714
6.47638899594507e-10	-20	0.714285714285714
1.71689433439439e-06	-20	0.714285714285714
-0.0378982097494178	-20	0.714285714285714
0.977960946536433	-20	0.714285714285714
-0.00478218301851984	-20	0.714285714285714
1.39305395953741	-20	0.714285714285714
-4.91242557059411e-12	-20	0.714285714285714
-0.520992424270557	-20	0.714285714285714
-0.000286365904254098	-20	0.714285714285714
0.00478349435965803	-20	0.714285714285714
0.00217762655180793	-20	0.714285714285714
-0.255043975363259	-20	0.714285714285714
-1.06309991163663	-20	0.714285714285714
6.00367958974356e-06	-20	0.714285714285714
0.0169656830603584	-20	0.714285714285714
3.69691192062457	-20	0.714285714285714
0.581923545392401	-20	0.714285714285714
0.000438955746581884	-20	0.714285714285714
-0.0175825892096652	-20	0.714285714285714
-0.0112423903209361	-20	0.714285714285714
-1.57113597225913	-20	0.714285714285714
-0.0911903329835482	-20	0.714285714285714
-0.394753898837889	-20	0.714285714285714
-1.66667077728233e-06	-20	0.714285714285714
0.597861585357556	-20	0.714285714285714
0.000329836592566077	-20	0.714285714285714
3.60880144285801	-20	0.714285714285714
-0.00405393243512824	-20	0.714285714285714
0.240931724032475	-20	0.714285714285714
0.0261394672734979	-20	0.714285714285714
3.48469618370408e-08	-20	0.714285714285714
0.0774416006530567	-20	0.714285714285714
-0.594446075090536	-20	0.714285714285714
0.0066173539883127	-20	0.714285714285714
1.45280964725442	-20	0.714285714285714
0.142788331433108	-20	0.714285714285714
0.0513939265951301	-20	0.714285714285714
-0.676346927731457	-20	0.714285714285714
-0.0151757160581002	-20	0.714285714285714
-0.00118915449139775	-20	0.714285714285714
-0.0152952650481097	-20	0.714285714285714
0.00275485221701724	-20	0.714285714285714
-2.51117940059067e-06	-20	0.714285714285714
-0.00139597289925952	-20	0.714285714285714
-0.251644600281233	-20	0.714285714285714
-1.17089382439859e-06	-20	0.714285714285714
1.70029370372991	-20	0.714285714285714
-9.12878401348502e-08	-20	0.714285714285714
0.0251580256625371	-20	0.714285714285714
-0.0907098395826881	-20	0.714285714285714
0.00292920010927593	-20	0.714285714285714
-3.28488772907851	-20	0.714285714285714
0.0292757190484354	-20	0.714285714285714
-4.74847561015591e-05	-20	0.714285714285714
0.156389634548581	-20	0.714285714285714
-0.524738052436998	-20	0.714285714285714
1.01117974298212	-20	0.714285714285714
-0.141138446704083	-20	0.714285714285714
-0.00111056917634968	-20	0.714285714285714
-6.10152056544687e-05	-20	0.714285714285714
-1.28042075312185e-08	-20	0.714285714285714
0.218771633770659	-20	0.714285714285714
-0.000100500578181083	-20	0.714285714285714
0.0519881547456919	-20	0.714285714285714
-0.0136413551035761	-20	0.714285714285714
-0.0467065568833988	-20	0.714285714285714
-0.232575748299536	-20	0.714285714285714
-0.105995195512276	-20	0.714285714285714
0.00424778085248358	-20	0.714285714285714
0.00381626179262217	-20	0.714285714285714
2.45181393033895e-07	-20	0.714285714285714
-3.79598394910271e-07	-20	0.714285714285714
-0.00192918699238271	-20	0.714285714285714
-0.62543582020999	-20	0.714285714285714
0.143436822519428	-20	0.714285714285714
0.500479805011011	-20	0.714285714285714
4.93706994472894e-06	-20	0.714285714285714
1.49981096404692e-05	-20	0.714285714285714
0.00801779103629115	-20	0.714285714285714
7.19941016989048e-08	-20	0.714285714285714
3.42292423582703	-20	0.714285714285714
-0.37851925921298	-20	0.714285714285714
0.0832643360355738	-20	0.714285714285714
-0.00508939089516309	-20	0.714285714285714
-0.0672636594728837	-20	0.714285714285714
-0.0454215549085337	-20	0.714285714285714
-0.0713840389707361	-20	0.714285714285714
0.707947374910014	-20	0.714285714285714
-0.0106347931198823	-20	0.714285714285714
-2.4907759744639e-05	-20	0.714285714285714
-0.0923807247476539	-20	0.714285714285714
-4.01102239719687e-07	-20	0.714285714285714
-0.0892757284235376	-20	0.714285714285714
-0.0949127697773043	-20	0.714285714285714
-0.373187837831192	-20	0.714285714285714
3.06754678072623e-05	-20	0.714285714285714
-1.35197815605851e-09	-20	0.714285714285714
-0.669553077788421	-20	0.714285714285714
-1.54672227842252	-20	0.714285714285714
0.479451980021066	-20	0.714285714285714
-1.9970520479453e-06	-20	0.714285714285714
6.98073192387249e-05	-20	0.714285714285714
-0.0436361345533025	-20	0.714285714285714
-0.00108691560710542	-20	0.714285714285714
0.0282315072106146	-20	0.714285714285714
0.383167142622254	-20	0.714285714285714
8.41103404758066e-08	-20	0.714285714285714
-0.00214985896634921	-20	0.714285714285714
0.0207609248744944	-20	0.714285714285714
0.200668452226529	-20	0.714285714285714
1.21091330959271e-05	-20	0.714285714285714
0.00703814623349401	-20	0.714285714285714
-0.385312093022375	-20	0.714285714285714
2.46034243210508	-20	0.714285714285714
0.354848152737649	-20	0.714285714285714
-0.0211395195124571	-20	0.714285714285714
-0.129410738147398	-20	0.714285714285714
-0.00198539992883754	-20	0.714285714285714
1.77162300937695	-20	0.714285714285714
0.00210011460871621	-20	0.714285714285714
0.00384709436836029	-20	0.714285714285714
-0.000244926507833511	-20	0.714285714285714
-0.243447942262999	-20	0.714285714285714
-3.39853553147522	-20	0.714285714285714
1.55728251345941	-20	0.714285714285714
0.00530904389020249	-20	0.714285714285714
0.00108590591564391	-20	0.714285714285714
-1.47225164631912e-10	-20	0.714285714285714
0.23955783062551	-20	0.714285714285714
-1.1318577818278e-05	-20	0.714285714285714
-0.26689235012949	-20	0.714285714285714
-0.282273392385779	-20	0.714285714285714
0.00122471412216763	-20	0.714285714285714
-0.00183984819479641	-20	0.714285714285714
0.000409091994939323	-20	0.714285714285714
-0.482773008400459	-20	0.714285714285714
-1.2617449027484e-08	-20	0.714285714285714
0.00059162912223642	-20	0.714285714285714
-0.0030589497028024	-20	0.714285714285714
-6.79913727704894e-05	-20	0.714285714285714
0.144894861153031	-20	0.714285714285714
-0.772232144926662	-20	0.714285714285714
0.105821825267319	-20	0.714285714285714
-0.00111013009312874	-20	0.714285714285714
-1.40932962242246e-05	-20	0.714285714285714
0.280105396295946	-20	0.714285714285714
-6.00210436223985e-08	-20	0.714285714285714
-0.396421570461386	-20	0.714285714285714
-0.00141056530325713	-20	0.714285714285714
-0.000160979336081571	-20	0.714285714285714
0.0289986201570641	-20	0.714285714285714
0.907421559765426	-20	0.714285714285714
0.000410029689749884	-20	0.714285714285714
-0.0616108183938623	-20	0.714285714285714
7.49957717914614e-05	-20	0.714285714285714
0.0952647238694037	-20	0.714285714285714
-1.35160318452355	-20	0.714285714285714
-0.0185078420711499	-20	0.714285714285714
1.79862208184226e-05	-20	0.714285714285714
0.00122691033758146	-20	0.714285714285714
0.000497156741038494	-20	0.714285714285714
0.162421774488774	-20	0.714285714285714
3.32697861994608e-05	-20	0.714285714285714
0.0649522380189502	-20	0.714285714285714
0.152013945570421	-20	0.714285714285714
0.0865776814616417	-20	0.714285714285714
-0.00584017870081082	-20	0.714285714285714
4.48754633411359e-11	-20	0.714285714285714
0.587023321812182	-20	0.714285714285714
-8.64595574167611e-06	-20	0.714285714285714
-0.495524510551456	-20	0.714285714285714
1.55437816103827	-20	0.714285714285714
-0.00143166289447702	-20	0.714285714285714
1.41895393602972	-20	0.714285714285714
-0.583332062077079	-20	0.714285714285714
-0.165889104382133	-20	0.714285714285714
-0.127187529237516	-20	0.714285714285714
-1.80651290511668	-20	0.714285714285714
-1.03205262551277e-05	-20	0.714285714285714
0.0145842735682805	-20	0.714285714285714
1.54631287636484	-20	0.714285714285714
0.000494855249003264	-20	0.714285714285714
-0.0675671091861518	-20	0.714285714285714
-8.08765215527235e-05	-20	0.714285714285714
0.000545735711053598	-20	0.714285714285714
-0.000202499116843459	-20	0.714285714285714
-0.868900009838094	-20	0.714285714285714
-1.06850347299851	-20	0.714285714285714
0.00301055402603917	-20	0.714285714285714
1.73932929977111	-20	0.714285714285714
3.7308061596787e-05	-20	0.714285714285714
0.0465318080626528	-20	0.714285714285714
2.41434154680636e-05	-20	0.714285714285714
-0.109002686013995	-20	0.714285714285714
-0.0381448000687135	-20	0.714285714285714
-0.00958637897898387	-20	0.714285714285714
-1.28038392344627e-06	-20	0.714285714285714
-0.0101583442296747	-20	0.714285714285714
-2.74185418203009e-08	-20	0.714285714285714
-0.0173895111225462	-20	0.714285714285714
0.0660361881090706	-20	0.714285714285714
-8.82405205102318e-08	-20	0.714285714285714
1.35980319607297e-05	-20	0.714285714285714
0.178523226843171	-20	0.714285714285714
8.60675051651292e-05	-20	0.714285714285714
0.0212630283219164	-20	0.714285714285714
0.00110364237050437	-20	0.714285714285714
0.0963319264340599	-20	0.714285714285714
-0.0908940418811769	-20	0.714285714285714
-9.46685606038132e-05	-20	0.714285714285714
0.109830567546723	-20	0.714285714285714
-0.0592481858200468	-20	0.714285714285714
0.000878856050944489	-20	0.714285714285714
1.23696603275766	-20	0.714285714285714
-2.51647858055379e-05	-20	0.714285714285714
-1.68467714838211	-20	0.714285714285714
0.972385448824497	-20	0.714285714285714
0.972363878991468	-20	0.714285714285714
9.4526966029713e-07	-20	0.714285714285714
-0.167328551135521	-20	0.714285714285714
-0.000333287464801673	-20	0.714285714285714
0.00539713814425239	-20	0.714285714285714
9.96034178143831e-06	-20	0.714285714285714
0.0070770955500175	-20	0.714285714285714
0.00124157092010107	-20	0.714285714285714
0.510007895972433	-20	0.714285714285714
0.406976333599587	-20	0.714285714285714
0	-20	0.714285714285714
0.14952499898021	-20	0.714285714285714
-0.511229787909211	-20	0.714285714285714
3.6969234730765e-09	-20	0.714285714285714
-3.47215842524112	-20	0.714285714285714
0.348358131385853	-20	0.714285714285714
5.32222338997841e-05	-20	0.714285714285714
0.00223139362440961	-20	0.714285714285714
0.00108697552782018	-20	0.714285714285714
0.0414263711522009	-20	0.714285714285714
0.065894478006558	-20	0.714285714285714
-0.00336451331809971	-20	0.714285714285714
-3.19207399700106	-20	0.714285714285714
0.066726401647291	-20	0.714285714285714
-0.0783720723758045	-20	0.714285714285714
1.09376686830906	-20	0.714285714285714
0.000208077901064173	-20	0.714285714285714
1.55051348729714	-20	0.714285714285714
4.60550971146432e-11	-20	0.714285714285714
0.00360691184639851	-20	0.714285714285714
-0.432207232463829	-20	0.714285714285714
0.00487462543678744	-20	0.714285714285714
-2.31668431390039e-06	-20	0.714285714285714
-0.771019871937995	-20	0.714285714285714
0.000123043513300489	-20	0.714285714285714
0.274117246825029	-20	0.714285714285714
-3.53545425512828e-09	-20	0.714285714285714
0.000637338427614748	-20	0.714285714285714
3.31503266093878e-07	-20	0.714285714285714
0.0540790954909994	-20	0.714285714285714
-1.15347580044959	-20	0.714285714285714
-6.4902216715074e-05	-20	0.714285714285714
0.344246365358408	-20	0.714285714285714
-0.654008368686499	-20	0.714285714285714
3.4369170836695e-05	-20	0.714285714285714
-2.06729542119116	-20	0.714285714285714
-0.0431861270900762	-20	0.714285714285714
-0.117789459349663	-20	0.714285714285714
-0.0238347682902731	-20	0.714285714285714
1.1055625591034	-20	0.714285714285714
-0.00683856724404054	-20	0.714285714285714
-0.00675288835719679	-20	0.714285714285714
-0.228240121123695	-20	0.714285714285714
2.66688517537904e-06	-20	0.714285714285714
-1.8625000302881e-05	-20	0.714285714285714
-0.00568949054859172	-20	0.714285714285714
-0.000287243635695994	-20	0.714285714285714
-0.131477308005136	-20	0.714285714285714
0.0564732564562772	-20	0.714285714285714
-9.82158783857247e-05	-20	0.714285714285714
-3.21779649905702	-20	0.714285714285714
0.00649009030894492	-20	0.714285714285714
-2.3528040251342	-20	0.714285714285714
0.18538248253169	-20	0.714285714285714
-0.144289321059833	-20	0.714285714285714
0.0573853855158964	-20	0.714285714285714
2.91274763912839	-20	0.714285714285714
0.0115490331633858	-20	0.714285714285714
-1.34940387873948	-20	0.714285714285714
-1.16850593179422	-20	0.714285714285714
-0.00735232538733118	-20	0.714285714285714
-0.000717040563166387	-20	0.714285714285714
0.723820573293366	-20	0.714285714285714
4.32832376626236e-08	-20	0.714285714285714
-0.499057581235341	-20	0.714285714285714
0.119597034140278	-20	0.714285714285714
-0.0324419627760481	-20	0.714285714285714
-0.00016206820756222	-20	0.714285714285714
-2.49336699732306e-07	-20	0.714285714285714
-0.153459826190762	-20	0.714285714285714
-0.000261676584064351	-20	0.714285714285714
-6.82701350202129e-07	-20	0.714285714285714
-0.0934379422325988	-20	0.714285714285714
-0.000150189725868206	-20	0.714285714285714
1.22835985739181e-06	-20	0.714285714285714
-0.0822217704621654	-20	0.714285714285714
-0.00343909876335397	-20	0.714285714285714
-0.000161564489188715	-20	0.714285714285714
1.23472042001689e-08	-20	0.714285714285714
-0.0153915126590285	-20	0.714285714285714
0.101395476939253	-20	0.714285714285714
2.71584593565971e-06	-20	0.714285714285714
-0.0158294021711638	-20	0.714285714285714
-0.103721817115814	-20	0.714285714285714
-0.772781150368186	-20	0.714285714285714
2.62219553035012e-05	-20	0.714285714285714
0.00422759975757242	-20	0.714285714285714
2.43690996719963e-08	-20	0.714285714285714
0.0105769107081284	-20	0.714285714285714
-0.340555677867457	-20	0.714285714285714
-0.680608568478447	-20	0.714285714285714
-0.0220916710454208	-20	0.714285714285714
-9.89862289773478e-07	-20	0.714285714285714
0.000323713018021399	-20	0.714285714285714
2.62700940933632	-20	0.714285714285714
-3.98131403727566e-07	-20	0.714285714285714
3.41358970236909	-20	0.714285714285714
-3.66740951571802	-20	0.714285714285714
-0.519923126377369	-20	0.714285714285714
0.681148090380268	-20	0.714285714285714
0.00156359710767631	-20	0.714285714285714
0.296857688805372	-20	0.714285714285714
0.00149471495874486	-20	0.714285714285714
0.00037715070337962	-20	0.714285714285714
0.000100328336287141	-20	0.714285714285714
-7.88460046606817e-06	-20	0.714285714285714
0.0197007814229789	-20	0.714285714285714
-0.0230249742566606	-20	0.714285714285714
0.0515610152130901	-20	0.714285714285714
0.000549704108120774	-20	0.714285714285714
-0.0540769957210788	-20	0.714285714285714
-1.4455254471929	-20	0.714285714285714
-0.184896872480378	-20	0.714285714285714
0.0319588227663567	-20	0.714285714285714
-0.0382698060058533	-20	0.714285714285714
-0.000536339886987415	-20	0.714285714285714
0.180478574231558	-20	0.714285714285714
-1.23849687882421e-05	-20	0.714285714285714
-3.11337209904452e-10	-20	0.714285714285714
1.52126485739863	-20	0.714285714285714
-1.85735017200925e-05	-20	0.714285714285714
2.53257078476458e-10	-20	0.714285714285714
-2.74369784003229	-20	0.714285714285714
9.14250277406098e-05	-20	0.714285714285714
-0.0164165666313547	-20	0.714285714285714
-7.81253513801166e-06	-20	0.714285714285714
5.60240833958523e-07	-20	0.714285714285714
1.78378331906478e-05	-20	0.714285714285714
0.319215076063806	-20	0.714285714285714
6.10200595685306e-08	-20	0.714285714285714
-8.37533574630149e-05	-20	0.714285714285714
-0.0795095105051762	-20	0.714285714285714
8.72235069326443e-05	-20	0.714285714285714
1.63945301553061	-20	0.714285714285714
0.156537283316023	-20	0.714285714285714
-1.78896134275591e-06	-20	0.714285714285714
-0.0133642625966915	-20	0.714285714285714
0.0527075674010087	-20	0.714285714285714
0.0119453413173827	-20	0.714285714285714
0.0010415884500702	-20	0.714285714285714
-2.21985461901712	-20	0.714285714285714
0.00102748407978853	-20	0.714285714285714
-0.0107708305425962	-20	0.714285714285714
-0.000258005391352731	-20	0.714285714285714
-0.0300846093345926	-20	0.714285714285714
-6.32907575101959e-12	-20	0.714285714285714
7.4496091423766e-07	-20	0.714285714285714
0.020985046203352	-20	0.714285714285714
-0.00139512603673117	-20	0.714285714285714
-0.000161469222286739	-20	0.714285714285714
5.99974350236094e-09	-20	0.714285714285714
0.0413367896361747	-20	0.714285714285714
-6.12989759568872e-05	-20	0.714285714285714
0.0567320685368283	-20	0.714285714285714
-0.00499346896889389	-20	0.714285714285714
-1.5057514419114	-20	0.714285714285714
-0.00246758884036378	-20	0.714285714285714
0.12387644844358	-20	0.714285714285714
1.34690194798424	-20	0.714285714285714
-0.336203814729309	-20	0.714285714285714
-0.00107290728577955	-20	0.714285714285714
-8.34607306040069e-06	-20	0.714285714285714
-6.90033608212751e-06	-20	0.714285714285714
0.208700404126371	-20	0.714285714285714
-0.00384717038705035	-20	0.714285714285714
3.6855496504831e-05	-20	0.714285714285714
5.04886246125331e-08	-20	0.714285714285714
-1.47196536984832e-06	-20	0.714285714285714
-0.00502192075809266	-20	0.714285714285714
0.0124515702384277	-20	0.714285714285714
-6.28449841165636e-06	-20	0.714285714285714
-0.000878340527154954	-20	0.714285714285714
1.89594528077983	-20	0.714285714285714
0.223847833082886	-20	0.714285714285714
-0.0703165500943204	-20	0.714285714285714
1.47137437646356	-20	0.714285714285714
-0.0532491749055357	-20	0.714285714285714
-0.0780884678195382	-20	0.714285714285714
-0.0175642780298169	-20	0.714285714285714
-0.0232241226113895	-20	0.714285714285714
-0.434324240434538	-20	0.714285714285714
-0.0776421543231222	-20	0.714285714285714
-0.297265575185925	-20	0.714285714285714
-0.023257088464129	-20	0.714285714285714
-0.401055512024916	-20	0.714285714285714
0.971409038128305	-20	0.714285714285714
0.656088652289521	-20	0.714285714285714
-4.00815013941792e-12	-20	0.714285714285714
-0.759107885646677	-20	0.714285714285714
-0.0223009470250956	-20	0.714285714285714
0.0359457507423485	-20	0.714285714285714
-0.0338737984173795	-20	0.714285714285714
-0.0337695923504221	-20	0.714285714285714
-3.07525105601477e-06	-20	0.714285714285714
0.107946257919006	-20	0.714285714285714
0.131232730453915	-20	0.714285714285714
0.164677996043745	-20	0.714285714285714
-9.42271229909716e-05	-20	0.714285714285714
-4.28702033590259e-09	-20	0.714285714285714
-0.00135690215753435	-20	0.714285714285714
-0.161938035947627	-20	0.714285714285714
4.57243108174175e-07	-20	0.714285714285714
-0.0284940172766089	-20	0.714285714285714
-6.84459379271896e-05	-20	0.714285714285714
-0.00019650967973093	-20	0.714285714285714
9.20422301684054e-05	-20	0.714285714285714
4.41120269752503e-08	-20	0.714285714285714
-1.14470361493925e-07	-20	0.714285714285714
0.00452913007848146	-20	0.714285714285714
0.0846214738809639	-20	0.714285714285714
-0.0190318311146029	-20	0.714285714285714
0.0221649983903263	-20	0.714285714285714
-0.0649106073660183	-20	0.714285714285714
0.0264722197672778	-20	0.714285714285714
0.133203139582149	-20	0.714285714285714
1.29033943451447e-07	-20	0.714285714285714
0.00339473065270107	-20	0.714285714285714
1.9323272489353	-20	0.714285714285714
-0.00369040821606978	-20	0.714285714285714
1.28083738647205	-20	0.714285714285714
-0.00659122342925386	-20	0.714285714285714
-0.000341685633107874	-20	0.714285714285714
-0.0252348329682434	-20	0.714285714285714
-0.0861149013269941	-20	0.714285714285714
2.08500960321403	-20	0.714285714285714
0.212137108893808	-20	0.714285714285714
0.011989572439498	-20	0.714285714285714
7.06237673858795e-05	-20	0.714285714285714
2.31706820083799e-05	-20	0.714285714285714
-1.28304783532424e-09	-20	0.714285714285714
-0.0118995989089164	-20	0.714285714285714
-0.766378019490782	-20	0.714285714285714
-0.131227171710757	-20	0.714285714285714
-0.00379799036673491	-20	0.714285714285714
3.33314137939284	-20	0.714285714285714
-0.0566245738881268	-20	0.714285714285714
1.11270394982551	-20	0.714285714285714
-0.48122137732755	-20	0.714285714285714
-0.689731525955989	-20	0.714285714285714
-0.772133407045639	-20	0.714285714285714
-0.654159640564298	-20	0.714285714285714
1.56919252295824e-11	-20	0.714285714285714
-0.0263016627590397	-20	0.714285714285714
-2.85261260110847	-20	0.714285714285714
-2.48347923327259	-20	0.714285714285714
-0.0116856208376729	-20	0.714285714285714
-4.38739778090163e-05	-20	0.714285714285714
-0.00178505299707038	-20	0.714285714285714
0.0538306677065954	-20	0.714285714285714
0.0893012201979695	-20	0.714285714285714
5.79417377584204e-05	-20	0.714285714285714
-4.95106741137566e-05	-20	0.714285714285714
-3.61032683973922	-20	0.714285714285714
0.0351401627209752	-20	0.714285714285714
-3.55746609932944e-07	-20	0.714285714285714
0.000104608110902917	-20	0.714285714285714
0.00094987242570915	-20	0.714285714285714
-0.0284372543031805	-20	0.714285714285714
0.567137124334109	-20	0.714285714285714
-0.0980675911813828	-20	0.714285714285714
1.40686722713326	-20	0.714285714285714
-3.70651256256359	-20	0.714285714285714
0.0103212423222047	-20	0.714285714285714
0.173473497410795	-20	0.714285714285714
-2.25012148774329e-07	-20	0.714285714285714
0.950180600006849	-20	0.714285714285714
3.19549732889362	-20	0.714285714285714
-0.00514160241554723	-20	0.714285714285714
-0.0678583900014542	-20	0.714285714285714
0.00114971924428821	-20	0.714285714285714
0.143965657353663	-20	0.714285714285714
-1.7886912459432	-20	0.714285714285714
1.30033266683958e-07	-20	0.714285714285714
-1.32061219956803e-08	-20	0.714285714285714
0.221216472727842	-20	0.714285714285714
0.00251560465522147	-20	0.714285714285714
0.0414890739064098	-20	0.714285714285714
0.0179313662449789	-20	0.714285714285714
0.639397045116448	-20	0.714285714285714
-0.00146607851080009	-20	0.714285714285714
2.8270933831842	-20	0.714285714285714
-0.00233133757911611	-20	0.714285714285714
0.000219170964826811	-20	0.714285714285714
-0.140949446784931	-20	0.714285714285714
-6.85912043259898e-06	-20	0.714285714285714
0.0068156435987743	-20	0.714285714285714
-0.325063658155138	-20	0.714285714285714
-0.222867495145672	-20	0.714285714285714
2.10481017811054	-20	0.714285714285714
-0.212889100118209	-20	0.714285714285714
0.00243288071061527	-20	0.714285714285714
-0.0720709133068704	-20	0.714285714285714
1.71486496371658	-20	0.714285714285714
-1.05887651630581	-20	0.714285714285714
-0.000489141786897483	-20	0.714285714285714
1.42359639390044e-05	-20	0.714285714285714
-0.426841641549599	-20	0.714285714285714
-0.00304585670402539	-20	0.714285714285714
1.79706702502252e-10	-20	0.714285714285714
3.57705753113463	-20	0.714285714285714
0.101086129887261	-20	0.714285714285714
-5.54811644316816e-05	-20	0.714285714285714
-3.59447138713758e-07	-20	0.714285714285714
0.781054003798442	-20	0.714285714285714
0.0135674035703849	-20	0.714285714285714
0.00670844713072154	-20	0.714285714285714
0.191390570548756	-20	0.714285714285714
0.00230449425647973	-20	0.714285714285714
-0.0110401815846353	-20	0.714285714285714
3.26643610929101	-20	0.714285714285714
0.000653370456323572	-20	0.714285714285714
0.0009691030410448	-20	0.714285714285714
0.0219401155408322	-20	0.714285714285714
-0.0892618243108444	-20	0.714285714285714
-2.3062839794085e-05	-20	0.714285714285714
-1.15391648239886	-20	0.714285714285714
-0.0561265474264303	-20	0.714285714285714
-0.00116923900218533	-20	0.714285714285714
0.00467521579601426	-20	0.714285714285714
-0.223525984517597	-20	0.714285714285714
-1.7112943372662	-20	0.714285714285714
0.0508170835247837	-20	0.714285714285714
1.12262934270281	-20	0.714285714285714
-0.136308909911431	-20	0.714285714285714
-0.0166629293001138	-20	0.714285714285714
-3.42140083433592	-20	0.714285714285714
2.30802448690094	-20	0.714285714285714
-0.0413426313252001	-20	0.714285714285714
0.22152684187431	-20	0.714285714285714
0.0506717226528091	-20	0.714285714285714
2.89818595435905e-07	-20	0.714285714285714
0.0004805035581739	-20	0.714285714285714
-0.00243408518154337	-20	0.714285714285714
-1.71594308159056e-05	-20	0.714285714285714
-0.0827553937656869	-20	0.714285714285714
-0.0263468051713275	-20	0.714285714285714
0.0294206759791131	-20	0.714285714285714
0.0218521932343512	-20	0.714285714285714
-0.00136411238111653	-20	0.714285714285714
1.47539794294373	-20	0.714285714285714
0.796487092303926	-20	0.714285714285714
1.96801344505092e-09	-20	0.714285714285714
0.0644576368492605	-20	0.714285714285714
-0.53668798984203	-20	0.714285714285714
0.000329615065252562	-20	0.714285714285714
0.0100024614434979	-20	0.714285714285714
-0.124369803345644	-20	0.714285714285714
-0.00292400637126716	-20	0.714285714285714
0.000327933983329776	-20	0.714285714285714
-1.67847107208075	-20	0.714285714285714
0.00761046443241577	-20	0.714285714285714
0.917821658658283	-20	0.714285714285714
0.259665955526876	-20	0.714285714285714
-0.00472218740727206	-20	0.714285714285714
-4.13673421448474e-08	-20	0.714285714285714
-1.62665995416213	-20	0.714285714285714
-8.41610667295813e-07	-20	0.714285714285714
-0.000132685480740456	-20	0.714285714285714
-8.55089157107083e-08	-20	0.714285714285714
-3.21504742445644	-20	0.714285714285714
4.59861218892395e-08	-20	0.714285714285714
1.61673079324613e-12	-20	0.714285714285714
-0.000435484430543903	-20	0.714285714285714
0.0731072482838744	-20	0.714285714285714
0.00250583226380462	-20	0.714285714285714
-0.00146017815629719	-20	0.714285714285714
0.64556704045351	-20	0.714285714285714
-0.0292753489398772	-20	0.714285714285714
0.0038105792865051	-20	0.714285714285714
-1.19241039455405	-20	0.714285714285714
0.0315070740951538	-20	0.714285714285714
0.00245531751128103	-20	0.714285714285714
-0.0325709770778307	-20	0.714285714285714
-0.0239665870227732	-20	0.714285714285714
-3.5933766508312	-20	0.714285714285714
-1.75856738452677e-05	-20	0.714285714285714
-1.10061092334935	-20	0.714285714285714
-0.00486419317618395	-20	0.714285714285714
-3.53421169527877	-20	0.714285714285714
-0.233312908389417	-20	0.714285714285714
0.0836273949223719	-20	0.714285714285714
2.77609739157893	-20	0.714285714285714
4.2484519797601e-05	-20	0.714285714285714
-0.142493173067808	-20	0.714285714285714
-0.0250722523764391	-20	0.714285714285714
0.130340199357889	-20	0.714285714285714
1.29591914107056e-06	-20	0.714285714285714
0.00827341033358225	-20	0.714285714285714
1.27328096593309e-05	-20	0.714285714285714
1.69715326606669e-12	-20	0.714285714285714
-0.0067388943480936	-20	0.714285714285714
-0.000781865913330833	-20	0.714285714285714
-0.220139330836174	-20	0.714285714285714
-1.74242839874367	-20	0.714285714285714
-2.9788481344702e-10	-20	0.714285714285714
-0.0527195948627999	-20	0.714285714285714
-8.89180911707669e-05	-20	0.714285714285714
-1.4035891811988	-20	0.714285714285714
-0.0001020113185345	-20	0.714285714285714
0.168102190690498	-20	0.714285714285714
-0.00996653930771043	-20	0.714285714285714
-3.15721022179967	-20	0.714285714285714
1.1261562693865e-08	-20	0.714285714285714
0.000526257440737409	-20	0.714285714285714
-0.0555784991309575	-20	0.714285714285714
-9.30780216061461e-10	-20	0.714285714285714
0.0476328311850743	-20	0.714285714285714
0.000458782441143407	-20	0.714285714285714
0.00730560931198045	-20	0.714285714285714
-0.228052489527811	-20	0.714285714285714
0.00024192664454026	-20	0.714285714285714
1.78557030545932e-08	-20	0.714285714285714
-0.754187864004638	-20	0.714285714285714
9.38654256248082e-10	-20	0.714285714285714
-0.0843703735618861	-20	0.714285714285714
0.474001634972688	-20	0.714285714285714
2.41871910681314e-06	-20	0.714285714285714
0.211195162827036	-20	0.714285714285714
-1.26812272456038e-11	-20	0.714285714285714
-1.68497777687474	-20	0.714285714285714
3.32225376935216	-20	0.714285714285714
-0.201146161757071	-20	0.714285714285714
-0.0215643600491992	-20	0.714285714285714
-2.1850273037224e-05	-20	0.714285714285714
-0.360725529939075	-20	0.714285714285714
-0.241518797245122	-20	0.714285714285714
3.54758767669439	-20	0.714285714285714
0.00733236124139772	-20	0.714285714285714
0.00087942567593869	-20	0.714285714285714
-0.0805878920562742	-20	0.714285714285714
-0.0362281348418292	-20	0.714285714285714
-0.00174022827487499	-20	0.714285714285714
-0.0130343624500176	-20	0.714285714285714
-0.0047283175580534	-20	0.714285714285714
-1.63904653301185	-20	0.714285714285714
0.643439272666559	-20	0.714285714285714
-0.0819575374999862	-20	0.714285714285714
-0.632398652927859	-20	0.714285714285714
0.000537423088543236	-20	0.714285714285714
3.08859464113585e-06	-20	0.714285714285714
-5.54848060413186e-11	-20	0.714285714285714
-0.0348509932410591	-20	0.714285714285714
-0.0046643439905189	-20	0.714285714285714
1.89840386340157e-06	-20	0.714285714285714
0.946847127505682	-20	0.714285714285714
-0.0268144778019049	-20	0.714285714285714
-0.0578249158054642	-20	0.714285714285714
0.692612652409698	-20	0.714285714285714
0.163822331942935	-20	0.714285714285714
4.48148955504393e-08	-20	0.714285714285714
0.0930774216078457	-20	0.714285714285714
0.00114876897398933	-20	0.714285714285714
2.02465104208643e-05	-20	0.714285714285714
-2.67855645023363	-20	0.714285714285714
0.2361184998793	-20	0.714285714285714
1.11503922537853	-20	0.714285714285714
0.0371488966127693	-20	0.714285714285714
-0.0199245302027372	-20	0.714285714285714
-0.461289393098079	-20	0.714285714285714
-0.0917140804021331	-20	0.714285714285714
-0.201337779101832	-20	0.714285714285714
0.0531261349080576	-20	0.714285714285714
-0.00201763469930867	-20	0.714285714285714
0.0094403132557054	-20	0.714285714285714
-0.0186290430318774	-20	0.714285714285714
2.60174401996651e-11	-20	0.714285714285714
-0.0178254532587005	-20	0.714285714285714
0.447898735520081	-20	0.714285714285714
-0.0062458242097791	-20	0.714285714285714
3.58355114595254e-09	-20	0.714285714285714
0.328629688157682	-20	0.714285714285714
-1.04306334715446	-20	0.714285714285714
-0.000161848579387853	-20	0.714285714285714
0.159581941136024	-20	0.714285714285714
1.51080243114534	-20	0.714285714285714
-1.25743021958955	-20	0.714285714285714
-5.16242617406699e-07	-20	0.714285714285714
-1.25474380976155e-08	-20	0.714285714285714
0.00676006421260784	-20	0.714285714285714
0.517528440862481	-20	0.714285714285714
-0.00596352362590931	-20	0.714285714285714
0.540091630532961	-20	0.714285714285714
-0.00207931011965843	-20	0.714285714285714
-0.289722556305701	-20	0.714285714285714
-0.13532749977214	-20	0.714285714285714
-0.00694962331100751	-20	0.714285714285714
1.61133210710912	-20	0.714285714285714
-0.0105251979962545	-20	0.714285714285714
-0.236212365041814	-20	0.714285714285714
-1.13461132569161e-07	-20	0.714285714285714
-0.377846360926841	-20	0.714285714285714
-0.185050208006901	-20	0.714285714285714
0.000680726200848918	-20	0.714285714285714
-2.91413981021967e-09	-20	0.714285714285714
2.83188225065805e-05	-20	0.714285714285714
-0.0165607079142024	-20	0.714285714285714
-2.82280263172974	-20	0.714285714285714
-0.311351618028805	-20	0.714285714285714
-0.246420528134162	-20	0.714285714285714
0.12571323757007	-20	0.714285714285714
0.000518390693889817	-20	0.714285714285714
2.26281022160764e-05	-20	0.714285714285714
3.3603181010666e-05	-20	0.714285714285714
0.0349973628699717	-20	0.714285714285714
-1.50904522098403e-06	-20	0.714285714285714
-0.00724400412148514	-20	0.714285714285714
0.0580775175219706	-20	0.714285714285714
-3.46747713323018	-20	0.714285714285714
0.250230668000774	-20	0.714285714285714
0.0064721427384509	-20	0.714285714285714
0.28802090229288	-20	0.714285714285714
1.43852205442317e-05	-20	0.714285714285714
-0.00455543697570346	-20	0.714285714285714
0.182715624325228	-20	0.714285714285714
-0.00458489735572831	-20	0.714285714285714
1.2585168900725	-20	0.714285714285714
1.88452852579696e-08	-20	0.714285714285714
0.203241990776364	-20	0.714285714285714
-0.234481481375315	-20	0.714285714285714
1.97046331840462	-20	0.714285714285714
-1.05352177967478e-06	-20	0.714285714285714
-0.278839133956951	-20	0.714285714285714
0.165443327042654	-20	0.714285714285714
-1.82475342119919e-06	-20	0.714285714285714
0.973279495279236	-20	0.714285714285714
-5.4582405156108e-06	-20	0.714285714285714
0.117927542985971	-20	0.714285714285714
0.0214414749048195	-20	0.714285714285714
-0.00126742024792816	-20	0.714285714285714
0.304888890496358	-20	0.714285714285714
-3.45989829744958e-05	-20	0.714285714285714
0.010060654236978	-20	0.714285714285714
-0.000418813306655818	-20	0.714285714285714
0.103778841873394	-20	0.714285714285714
-0.0695644613496066	-20	0.714285714285714
-0.507126214168033	-20	0.714285714285714
0.0579645133724793	-20	0.714285714285714
0.00286094461684026	-20	0.714285714285714
0.00950516130696017	-20	0.714285714285714
1.52898040152788e-05	-20	0.714285714285714
-1.56774618139933	-20	0.714285714285714
-0.364833512201652	-20	0.714285714285714
1.0658931830017	-20	0.714285714285714
0.00187135068718361	-20	0.714285714285714
-1.04272929107654	-20	0.714285714285714
-0.0339255905657886	-20	0.714285714285714
9.44524396199302e-06	-20	0.714285714285714
0.438996295460772	-20	0.714285714285714
0.0540833650224897	-20	0.714285714285714
2.13315013431545	-20	0.714285714285714
9.67963765318429e-07	-20	0.714285714285714
-1.49355690678956	-20	0.714285714285714
0.00917154251297367	-20	0.714285714285714
-0.000818723837615554	-20	0.714285714285714
5.31011806709012e-05	-20	0.714285714285714
0.000791229555877906	-20	0.714285714285714
-0.29905224141533	-20	0.714285714285714
-0.0608749816990976	-20	0.714285714285714
-0.177721413430672	-20	0.714285714285714
-0.125129773497407	-20	0.714285714285714
-2.31957676695284	-20	0.714285714285714
-0.0952340537003307	-20	0.714285714285714
-0.792395154097685	-20	0.714285714285714
-0.00278768004666076	-20	0.714285714285714
7.82940128731844e-12	-20	0.714285714285714
3.0054152955636e-09	-20	0.714285714285714
-5.96201538082774e-07	-20	0.714285714285714
0.000684575217573845	-20	0.714285714285714
-0.000155634957167523	-20	0.714285714285714
0.0584474738425028	-20	0.714285714285714
-3.34877917669058e-06	-20	0.714285714285714
0.21261705469543	-20	0.714285714285714
0.182852927563902	-20	0.714285714285714
0.0227493588007087	-20	0.714285714285714
0.0144741497709766	-20	0.714285714285714
0.0147669703094136	-20	0.714285714285714
0.00285953604133671	-20	0.714285714285714
0.285023917512479	-20	0.714285714285714
0.00385375069259075	-20	0.714285714285714
8.72853519263074e-05	-20	0.714285714285714
-5.67335776365049e-09	-20	0.714285714285714
-0.000173289967282236	-20	0.714285714285714
-0.095979696328821	-20	0.714285714285714
-0.101257343339121	-20	0.714285714285714
1.91545879372816e-11	-20	0.714285714285714
0.0862281301723155	-20	0.714285714285714
0.0100080230771536	-20	0.714285714285714
-0.0515775734143918	-20	0.714285714285714
0.0165980612555467	-20	0.714285714285714
0.0102320266830503	-20	0.714285714285714
0.522157747639028	-20	0.714285714285714
0.00105939584289244	-20	0.714285714285714
-2.55593333629895e-05	-20	0.714285714285714
0.261866241995599	-20	0.714285714285714
0.000138615680623656	-20	0.714285714285714
0.0197668303270965	-20	0.714285714285714
4.24899782071926e-09	-20	0.714285714285714
-3.13067575461246e-06	-20	0.714285714285714
-1.08988221446493	-20	0.714285714285714
0.453755806909264	-20	0.714285714285714
-0.000406704203911732	-20	0.714285714285714
-0.0394522767737949	-20	0.714285714285714
0.000107351563690607	-20	0.714285714285714
3.19290381778261e-07	-20	0.714285714285714
-0.632034987169385	-20	0.714285714285714
-0.254007330228555	-20	0.714285714285714
0.000133960992633779	-20	0.714285714285714
-0.331317826706836	-20	0.714285714285714
0.0140279652955847	-20	0.714285714285714
-3.0876888324482	-20	0.714285714285714
-2.55386366207001e-10	-20	0.714285714285714
-5.6237869198919e-09	-20	0.714285714285714
2.74135990229177	-20	0.714285714285714
-0.000176279224815501	-20	0.714285714285714
4.90647020373915e-05	-20	0.714285714285714
-0.6538725847125	-20	0.714285714285714
-0.050528904282361	-20	0.714285714285714
-7.98419363271573e-06	-20	0.714285714285714
-3.93178807889264e-07	-20	0.714285714285714
0.0398380801962438	-20	0.714285714285714
0.000118380487956413	-20	0.714285714285714
-0.423982588576116	-20	0.714285714285714
1.14168141001486	-20	0.714285714285714
6.77410446922189e-05	-20	0.714285714285714
0.0165275699738809	-20	0.714285714285714
-2.41250110603191	-20	0.714285714285714
-0.333820123143314	-20	0.714285714285714
0.0121193093944206	-20	0.714285714285714
-0.000399039488902851	-20	0.714285714285714
0.279666043624976	-20	0.714285714285714
0.00599713421608702	-20	0.714285714285714
-0.594416360395845	-20	0.714285714285714
-1.02780961218342	-20	0.714285714285714
0.21245578113595	-20	0.714285714285714
0.000274402698418271	-20	0.714285714285714
-0.42873135419886	-20	0.714285714285714
-0.0952638667342131	-20	0.714285714285714
0.00275510923319815	-20	0.714285714285714
-0.036713107080652	-20	0.714285714285714
0.59225275908287	-20	0.714285714285714
-0.0043419711841917	-20	0.714285714285714
0.0621789716100454	-20	0.714285714285714
0.693646846957419	-20	0.714285714285714
8.57924001548098e-11	-20	0.714285714285714
2.71350676652325	-20	0.714285714285714
-0.102336637946137	-20	0.714285714285714
-0.0475596611510567	-20	0.714285714285714
-0.0260761689536431	-20	0.714285714285714
-7.63751160105268e-13	-20	0.714285714285714
0.012383713645181	-20	0.714285714285714
0.075578482258794	-20	0.714285714285714
3.1829483308249	-20	0.714285714285714
-0.0629690425302111	-20	0.714285714285714
0.00894517072163785	-20	0.714285714285714
0.000396162277872782	-20	0.714285714285714
0.403513162502726	-20	0.714285714285714
2.15280985444899e-06	-20	0.714285714285714
-0.0480322480372141	-20	0.714285714285714
-1.4839837086496e-09	-20	0.714285714285714
-0.00231633095731336	-20	0.714285714285714
0.199679308482004	-20	0.714285714285714
-0.0472122479425182	-20	0.714285714285714
2.48573144672927e-10	-20	0.714285714285714
1.07936234585725e-08	-20	0.714285714285714
5.32278606367455e-14	-20	0.714285714285714
-2.47144103560074	-20	0.714285714285714
0.0203832663827653	-20	0.714285714285714
0.000360825279629836	-20	0.714285714285714
-0.467725295285981	-20	0.714285714285714
1.90764439048504	-20	0.714285714285714
1.40491265578418e-10	-20	0.714285714285714
-0.336414204300673	-20	0.714285714285714
-1.24748163376177e-13	-20	0.714285714285714
-0.390385160869755	-20	0.714285714285714
8.52289527724239e-10	-20	0.714285714285714
0.000243629938657838	-20	0.714285714285714
5.91119237833979e-06	-20	0.714285714285714
0.0624572356308872	-20	0.714285714285714
0.00021531755486343	-20	0.714285714285714
2.76598077222362e-06	-20	0.714285714285714
-1.14897863169808e-08	-20	0.714285714285714
-0.427707563209808	-20	0.714285714285714
-0.00232293387832681	-20	0.714285714285714
0.000782742923199048	-20	0.714285714285714
-6.75383763256286e-11	-20	0.714285714285714
0.0436206706769198	-20	0.714285714285714
0.0320307076528767	-20	0.714285714285714
-0.25734660247733	-20	0.714285714285714
0.12279497711169	-20	0.714285714285714
-0.00397801259769577	-20	0.714285714285714
0.00750152911660212	-20	0.714285714285714
0.335529675505213	-20	0.714285714285714
0.113292094117309	-20	0.714285714285714
0.196667111985489	-20	0.714285714285714
-0.000894041845204572	-20	0.714285714285714
-0.233793317857429	-20	0.714285714285714
0.00082273506762699	-20	0.714285714285714
0.00564061036437449	-20	0.714285714285714
-0.00012323292051825	-20	0.714285714285714
0.00751752251441691	-20	0.714285714285714
-0.299871591475832	-20	0.714285714285714
0.00383289767142411	-20	0.714285714285714
-6.3865810206609e-08	-20	0.714285714285714
2.06324603715238	-20	0.714285714285714
-0.000509578648188709	-20	0.714285714285714
8.0258497094006e-05	-20	0.714285714285714
-0.00472622772740352	-20	0.714285714285714
-0.00103004929529621	-20	0.714285714285714
-0.172328410748811	-20	0.714285714285714
0.072172236707408	-20	0.714285714285714
-0.0549242758284239	-20	0.714285714285714
-7.74083087859191e-05	-20	0.714285714285714
-1.12079745266934	-20	0.714285714285714
0.0103072873986845	-20	0.714285714285714
-3.59373673940665	-20	0.714285714285714
0.13146711945375	-20	0.714285714285714
-1.10989455480434	-20	0.714285714285714
-0.00749134004428798	-20	0.714285714285714
-0.161866344180562	-20	0.714285714285714
-0.953595186829418	-20	0.714285714285714
-0.319412833567507	-20	0.714285714285714
-0.0267631008241165	-20	0.714285714285714
9.81512191059862e-07	-20	0.714285714285714
-0.00382186954791484	-20	0.714285714285714
-8.07670482241712e-09	-20	0.714285714285714
-0.058208299574633	-20	0.714285714285714
-0.0506251018414959	-20	0.714285714285714
0.0504849626810771	-20	0.714285714285714
-0.0319229621586005	-20	0.714285714285714
0.000364330021102448	-20	0.714285714285714
-0.000763760869822244	-20	0.714285714285714
[truncated: 23,601 more rows]
