# Supplementary material for: Specialized contributions of mid-tier stages of dorsal and ventral pathways to stereoscopic processing in macaque
Source: eLife journal article supplement (doi:10.7554/elife.58749), 2021-02-24
Supplement: supp [file elife-58749-supp-v1.zip › elife_poa_e58749_Figure_9_source_data_1.csv]

RelRFsize	BinoCorr	Disparity	Standard	Threshold
11.4285714285714	-100	-20	-0.00382477958310376	0.255975140847318
11.4285714285714	-100	-16	0.0228506562622845	0.27900031497418
11.4285714285714	-100	-12	0.00683903805029568	0.259695020006728
11.4285714285714	-100	-8	0.109887225743524	0.314125669589827
11.4285714285714	-100	-4	-0.145901137049025	0.144592592262714
11.4285714285714	-100	0	-1.02285926949391	-0
11.4285714285714	-100	4	-0.160834232111077	0.141727990377753
11.4285714285714	-100	8	0.131824890918229	0.340799372981466
11.4285714285714	-100	12	0.00412464869753168	0.262891213135297
11.4285714285714	-100	16	-0.00477214025575395	0.262599512166843
11.4285714285714	-100	20	0.0102424489990559	0.26958846050634
11.4285714285714	-66.6666666666667	-20	-0.00343947042692804	0.255970090951795
11.4285714285714	-66.6666666666667	-16	0.024126081181071	0.268089555807964
11.4285714285714	-66.6666666666667	-12	0.00623196511291231	0.257999845866466
11.4285714285714	-66.6666666666667	-8	0.0654450452976242	0.297888247235849
11.4285714285714	-66.6666666666667	-4	-0.109540334234654	0.193315828190348
11.4285714285714	-66.6666666666667	0	-0.667253743917967	0.0316013495686422
11.4285714285714	-66.6666666666667	4	-0.104285288585234	0.185661648289957
11.4285714285714	-66.6666666666667	8	0.0811680388311687	0.296209502518521
11.4285714285714	-66.6666666666667	12	0.0204554285912807	0.267341555591291
11.4285714285714	-66.6666666666667	16	-0.00796032323437199	0.257514978204034
11.4285714285714	-66.6666666666667	20	0.0192995407597313	0.270123512411913
11.4285714285714	-33.3333333333333	-20	-0.00107628909318659	0.264789578118779
11.4285714285714	-33.3333333333333	-16	0.0167261616756876	0.266509358724403
11.4285714285714	-33.3333333333333	-12	-0.000268810570574644	0.26494792050827
11.4285714285714	-33.3333333333333	-8	0.0636949847988929	0.292643146977923
11.4285714285714	-33.3333333333333	-4	-0.0554084331286543	0.230639122279785
11.4285714285714	-33.3333333333333	0	-0.353788081853728	0.116289866776928
11.4285714285714	-33.3333333333333	4	-0.0451434511144535	0.236022128641341
11.4285714285714	-33.3333333333333	8	0.0305695822702839	0.275488971548857
11.4285714285714	-33.3333333333333	12	0.0221154157545049	0.274231697457187
11.4285714285714	-33.3333333333333	16	-0.00120641402926621	0.25960344082058
11.4285714285714	-33.3333333333333	20	-0.00326206163390198	0.250677515134263
11.4285714285714	0	-20	0.0154036542082822	0.264232671207069
11.4285714285714	0	-16	0.00525094352264333	0.264491521798171
11.4285714285714	0	-12	0.00704274149475819	0.260121880357941
11.4285714285714	0	-8	-0.00688283124431534	0.260618242564401
11.4285714285714	0	-4	-0.000165098714297983	0.259788087597635
11.4285714285714	0	0	0.00332455123210605	0.262700695790588
11.4285714285714	0	4	-0.0036183162644265	0.260651744516355
11.4285714285714	0	8	-0.0128841973706889	0.252826449590296
11.4285714285714	0	12	-0.0200417304495954	0.249950828738193
11.4285714285714	0	16	-0.0017175920875145	0.257431216182224
11.4285714285714	0	20	-0.000637135144519253	0.263238221379705
11.4285714285714	33.3333333333333	-20	-0.00396945732693044	0.259137102093904
11.4285714285714	33.3333333333333	-16	0.00478102861606164	0.260971504986729
11.4285714285714	33.3333333333333	-12	0.0190734072033653	0.270198941352769
11.4285714285714	33.3333333333333	-8	-0.0423823542573	0.239885817827703
11.4285714285714	33.3333333333333	-4	0.0544633079184516	0.284736517996222
11.4285714285714	33.3333333333333	0	0.316087652689384	0.44023905413266
11.4285714285714	33.3333333333333	4	0.0601430653853349	0.285714836766035
11.4285714285714	33.3333333333333	8	-0.0381558631425221	0.236487392027247
11.4285714285714	33.3333333333333	12	0.00108212197531348	0.258337865795986
11.4285714285714	33.3333333333333	16	-0.0142793710084927	0.249439926088568
11.4285714285714	33.3333333333333	20	0.000624424871163333	0.26117405733657
11.4285714285714	66.6666666666667	-20	0.0110413215082721	0.264547250875284
11.4285714285714	66.6666666666667	-16	0.00576210190048201	0.264142346829319
11.4285714285714	66.6666666666667	-12	-0.00180094503064907	0.255642732571345
11.4285714285714	66.6666666666667	-8	-0.0770982057992046	0.228929200746079
11.4285714285714	66.6666666666667	-4	0.120153246738773	0.309376143884198
11.4285714285714	66.6666666666667	0	0.674368397659068	0.707396056480821
11.4285714285714	66.6666666666667	4	0.107559974002801	0.303782777709195
11.4285714285714	66.6666666666667	8	-0.0848420268880669	0.21437419366326
11.4285714285714	66.6666666666667	12	-0.0186399508279429	0.254198465044036
11.4285714285714	66.6666666666667	16	0.000981807928217956	0.25781729769794
11.4285714285714	66.6666666666667	20	-0.00502810368857076	0.256256564893626
11.4285714285714	100	-20	0.000947015241687374	0.26084310828634
11.4285714285714	100	-16	0.00644962808149785	0.257428338896507
11.4285714285714	100	-12	-0.00566746608506046	0.263660860127376
11.4285714285714	100	-8	-0.102388376249493	0.214272773234628
11.4285714285714	100	-4	0.156232044601029	0.299168591206202
11.4285714285714	100	0	1	1
11.4285714285714	100	4	0.148984293567987	0.295682262772375
11.4285714285714	100	8	-0.12227979372431	0.206633260839203
11.4285714285714	100	12	-0.0096137924238308	0.26740010228032
11.4285714285714	100	16	-0.00711868182797981	0.254370265266878
11.4285714285714	100	20	-0.00961526222832922	0.263875381634737
0.714285714285714	-100	-20	0.0207472373667637	0.184330772107608
0.714285714285714	-100	-16	0.00333324615738177	0.163027794722041
0.714285714285714	-100	-12	-0.179104643778952	0.116049722241764
0.714285714285714	-100	-8	-0.45154948197566	0.0646771142672135
0.714285714285714	-100	-4	-0.78223915633099	0.00470628775041301
0.714285714285714	-100	0	-0.997104995701402	-0
0.714285714285714	-100	4	-0.754649587094114	0.00422819938130155
0.714285714285714	-100	8	-0.453134477722561	0.0605619787487256
0.714285714285714	-100	12	-0.175368720750008	0.120528054559858
0.714285714285714	-100	16	-0.00715961740031547	0.159432323126296
0.714285714285714	-100	20	0.0254011712116798	0.177825149848513
0.714285714285714	-66.6666666666667	-20	0.0183072097596488	0.180523019278608
0.714285714285714	-66.6666666666667	-16	0.00439793854192681	0.172419363894884
0.714285714285714	-66.6666666666667	-12	-0.116240899119628	0.146857205977991
0.714285714285714	-66.6666666666667	-8	-0.29646353744342	0.136805766736455
0.714285714285714	-66.6666666666667	-4	-0.535553162317963	0.12264842261244
0.714285714285714	-66.6666666666667	0	-0.68002988166574	0.150246008979684
0.714285714285714	-66.6666666666667	4	-0.502470030846729	0.135753240122635
0.714285714285714	-66.6666666666667	8	-0.293258203536362	0.138754016003087
0.714285714285714	-66.6666666666667	12	-0.115775018478881	0.14861194527007
0.714285714285714	-66.6666666666667	16	0.00318505164359034	0.167232346186205
0.714285714285714	-66.6666666666667	20	0.020417143384783	0.183756407019822
0.714285714285714	-33.3333333333333	-20	0.00921293625040625	0.169160092230355
0.714285714285714	-33.3333333333333	-16	0.00505897175704093	0.168842293761088
0.714285714285714	-33.3333333333333	-12	-0.0767868914700665	0.160272336629222
0.714285714285714	-33.3333333333333	-8	-0.140317310640082	0.210149731198956
0.714285714285714	-33.3333333333333	-4	-0.239231744060915	0.258899153751206
0.714285714285714	-33.3333333333333	0	-0.332782222302881	0.305258767965378
0.714285714285714	-33.3333333333333	4	-0.261924872663271	0.240902695153467
0.714285714285714	-33.3333333333333	8	-0.159584179417894	0.198471636163397
0.714285714285714	-33.3333333333333	12	-0.0636974570355328	0.171269814650738
0.714285714285714	-33.3333333333333	16	0.00327845868120492	0.166932429673907
0.714285714285714	-33.3333333333333	20	-0.0055717849364721	0.170004412438682
0.714285714285714	0	-20	-0.0108068820937514	0.166262076729409
0.714285714285714	0	-16	0.00723675299417647	0.169580608208193
0.714285714285714	0	-12	0.00343277620639288	0.201908435955585
0.714285714285714	0	-8	-0.00193953454107551	0.284571277492359
0.714285714285714	0	-4	-0.0153965919860185	0.375796207627757
0.714285714285714	0	0	-0.00520162309939957	0.464757205166867
0.714285714285714	0	4	0.00553186303460294	0.371568701117731
0.714285714285714	0	8	-0.0158084013641373	0.275229466437697
0.714285714285714	0	12	0.000894331253498627	0.198695357503253
0.714285714285714	0	16	-0.00402131407225051	0.163610592814034
0.714285714285714	0	20	-0.00554353320483658	0.160244696133042
0.714285714285714	33.3333333333333	-20	-0.0101061708634547	0.162691991407139
0.714285714285714	33.3333333333333	-16	-0.0102198552086256	0.158397384290998
0.714285714285714	33.3333333333333	-12	0.0611126060896477	0.232560214139093
0.714285714285714	33.3333333333333	-8	0.154173503773395	0.362322951545476
0.714285714285714	33.3333333333333	-4	0.253442495699356	0.504026701079167
0.714285714285714	33.3333333333333	0	0.322240819525461	0.631510687172403
0.714285714285714	33.3333333333333	4	0.230991223292685	0.486471724559379
0.714285714285714	33.3333333333333	8	0.145994209661133	0.359998699350724
0.714285714285714	33.3333333333333	12	0.0577403241149137	0.231350585902273
0.714285714285714	33.3333333333333	16	0.00576736537730141	0.167281920002195
0.714285714285714	33.3333333333333	20	-0.00222616878365847	0.163331938712742
0.714285714285714	66.6666666666667	-20	-0.0147817179904034	0.160230966735865
0.714285714285714	66.6666666666667	-16	-0.0120485351615781	0.16447005534885
0.714285714285714	66.6666666666667	-12	0.119564213619371	0.268280122772548
0.714285714285714	66.6666666666667	-8	0.303389077888236	0.435657474967048
0.714285714285714	66.6666666666667	-4	0.513182760250877	0.650041124209283
0.714285714285714	66.6666666666667	0	0.675173320666786	0.822607666516066
0.714285714285714	66.6666666666667	4	0.522319334155097	0.645775388571868
0.714285714285714	66.6666666666667	8	0.311441802661077	0.449352617575719
0.714285714285714	66.6666666666667	12	0.118171123004904	0.261630535802051
0.714285714285714	66.6666666666667	16	0.0028768459343163	0.168480153635904
0.714285714285714	66.6666666666667	20	-0.0169186464438665	0.158286223012814
0.714285714285714	100	-20	-0.0353799420845232	0.153466015919844
0.714285714285714	100	-16	-0.0204577171548579	0.160540153455952
0.714285714285714	100	-12	0.178738326177064	0.296780889376927
0.714285714285714	100	-8	0.466515803619984	0.530437840250311
0.714285714285714	100	-4	0.768212047208151	0.772851903080545
0.714285714285714	100	0	1	1
0.714285714285714	100	4	0.765299377487317	0.76967540467694
0.714285714285714	100	8	0.440977018912455	0.508376628632512
0.714285714285714	100	12	0.188713869097459	0.303205561835147
0.714285714285714	100	16	0.00929391963395714	0.1721199151925
0.714285714285714	100	20	-0.0180706364443051	0.162244250658422
