# Supplementary material for: Specialized contributions of mid-tier stages of dorsal and ventral pathways to stereoscopic processing in macaque
Source: eLife journal article supplement (doi:10.7554/elife.58749), 2021-02-24
Supplement: supp [file elife-58749-supp-v1.zip › elife_poa_e58749_Figure_9_source_data_2.csv]

RelRFsize	BinoCorr	SignedAmpRatio
11.4285714285714	-100	-0.34224508233389
11.4285714285714	-80	-0.324411070059582
11.4285714285714	-60	-0.283998792014124
11.4285714285714	-40	-0.211159641312088
11.4285714285714	-20	-0.125236802367454
11.4285714285714	0	0.00447812812503946
11.4285714285714	20	0.133239202464734
11.4285714285714	40	0.373774020084159
11.4285714285714	60	0.512438237419418
11.4285714285714	80	0.734751642692408
11.4285714285714	100	1
5.71428571428571	-100	-0.338305106769364
5.71428571428571	-80	-0.309711644812955
5.71428571428571	-60	-0.247491819315029
5.71428571428571	-40	-0.172679247138595
5.71428571428571	-20	-0.0845927041756068
5.71428571428571	0	0.0333395622014362
5.71428571428571	20	0.174436582686543
5.71428571428571	40	0.343442595329172
5.71428571428571	60	0.555139981425335
5.71428571428571	80	0.750869613498204
5.71428571428571	100	1
2.85714285714286	-100	-0.308133949985625
2.85714285714286	-80	-0.230270609854506
2.85714285714286	-60	-0.154581345462627
2.85714285714286	-40	-0.0589840526404605
2.85714285714286	-20	0.0628373202762415
2.85714285714286	0	0.164101746163878
2.85714285714286	20	0.3269735982833
2.85714285714286	40	0.450497231765699
2.85714285714286	60	0.639766290713014
2.85714285714286	80	0.822932968362826
2.85714285714286	100	1
1.42857142857143	-100	-0.226947973228305
1.42857142857143	-80	-0.14171351499436
1.42857142857143	-60	-0.0111518680400479
1.42857142857143	-40	0.104868817974967
1.42857142857143	-20	0.204372318248116
1.42857142857143	0	0.356848080198952
1.42857142857143	20	0.447319315512504
1.42857142857143	40	0.598858552331887
1.42857142857143	60	0.750681266818518
1.42857142857143	80	0.873696856420848
1.42857142857143	100	1
0.714285714285714	-100	-0.204793808292265
0.714285714285714	-80	-0.0882441097385114
0.714285714285714	-60	0.00584760059793246
0.714285714285714	-40	0.141694737591612
0.714285714285714	-20	0.24267790049291
0.714285714285714	0	0.396340797735214
0.714285714285714	20	0.483456070773764
0.714285714285714	40	0.616551802978813
0.714285714285714	60	0.785860863047074
0.714285714285714	80	0.862734205818105
0.714285714285714	100	1
