# Supplementary material for: Specialized contributions of mid-tier stages of dorsal and ventral pathways to stereoscopic processing in macaque
Source: eLife journal article supplement (doi:10.7554/elife.58749), 2021-02-24
Supplement: supp [file elife-58749-supp-v1.zip › elife_poa_e58749_Figure_9_source_data_3.csv]

RelRFsize	AreaRatio
11.4285714285714	0.493241887905189
5.71428571428571	0.41414852501009
2.85714285714286	0.197582664076106
1.42857142857143	0.0684032133095264
0.714285714285714	0.046793439693386
